# Supplementary material for: A systematic review of patient-reported outcome measures (PROMs) in cystic fibrosis
Source: PubMed Central journal article supplement — BMJ Open. 2020 Oct 1;10(10):e033867. doi: 10.1136/bmjopen-2019-033867 (PMC7534676; doi:10.1136/bmjopen-2019-033867), 2020-10-01
Supplement: bmjopen-2019-033867.draft_revisions.pdf [file bmjopen-2019-033867.draft_revisions.pdf]

# BMJ Open

BMJ Open is committed to open peer review. As part of this commitment we make the peer review history of every article we publish publicly available.

When an article is published we post the peer reviewers' comments and the authors' responses online. We also post the versions of the paper that were used during peer review. These are the versions that the peer review comments apply to.

The versions of the paper that follow are the versions that were submitted during the peer review process. They are not the versions of record or the final published versions. They should not be cited or distributed as the published version of this manuscript.

BMJ Open is an open access journal and the full, final, typeset and author-corrected version of record of the manuscript is available on our site with no access controls, subscription charges or pay-per-view fees (<http://bmjopen.bmj.com>).

If you have any questions on BMJ Open's open peer review process please email [info.bmjopen@bmj.com](mailto:info.bmjopen@bmj.com)

# BMJ Open

## A Systematic Review of Patient Reported Outcome Measures (PROMs) in Cystic Fibrosis

|                               |                                                                                                                                                                                                                                                                               |
|-------------------------------|-------------------------------------------------------------------------------------------------------------------------------------------------------------------------------------------------------------------------------------------------------------------------------|
| Journal:                      | <i>BMJ Open</i>                                                                                                                                                                                                                                                               |
| Manuscript ID                 | bmjopen-2019-033867                                                                                                                                                                                                                                                           |
| Article Type:                 | Original research                                                                                                                                                                                                                                                             |
| Date Submitted by the Author: | 27-Aug-2019                                                                                                                                                                                                                                                                   |
| Complete List of Authors:     | Ratnayake, Irushi; Monash University, Department of Epidemiology and Preventive Medicine<br>Ahern, Susannah; Monash University Department of Epidemiology and Preventive Medicine,<br>Ruseckaite, Rasa; Monash University, Department of Epidemiology and Preventive Medicine |
| Keywords:                     | PUBLIC HEALTH, Cystic fibrosis < THORACIC MEDICINE, Paediatric thoracic medicine < THORACIC MEDICINE                                                                                                                                                                          |
|                               |                                                                                                                                                                                                                                                                               |

SCHOLARONE™  
Manuscripts

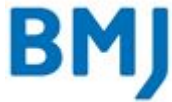

I, the Submitting Author has the right to grant and does grant on behalf of all authors of the Work (as defined in the below author licence), an exclusive licence and/or a non-exclusive licence for contributions from authors who are: i) UK Crown employees; ii) where BMJ has agreed a CC-BY licence shall apply, and/or iii) in accordance with the terms applicable for US Federal Government officers or employees acting as part of their official duties; on a worldwide, perpetual, irrevocable, royalty-free basis to BMJ Publishing Group Ltd ("BMJ") its licensees and where the relevant Journal is co-owned by BMJ to the co-owners of the Journal, to publish the Work in this journal and any other BMJ products and to exploit all rights, as set out in our [licence](#).

The Submitting Author accepts and understands that any supply made under these terms is made by BMJ to the Submitting Author unless you are acting as an employee on behalf of your employer or a postgraduate student of an affiliated institution which is paying any applicable article publishing charge ("APC") for Open Access articles. Where the Submitting Author wishes to make the Work available on an Open Access basis (and intends to pay the relevant APC), the terms of reuse of such Open Access shall be governed by a Creative Commons licence – details of these licences and which [Creative Commons](#) licence will apply to this Work are set out in our licence referred to above.

Other than as permitted in any relevant BMJ Author's Self Archiving Policies, I confirm this Work has not been accepted for publication elsewhere, is not being considered for publication elsewhere and does not duplicate material already published. I confirm all authors consent to publication of this Work and authorise the granting of this licence.

1  
2  
3 **Title:** A Systematic Review of Patient Reported Outcome Measures (PROMs) in Cystic  
4 Fibrosis

5  
6 **Authors:** Irushi Ratnayake<sup>1</sup>, Susannah Ahern<sup>1</sup> PhD, Rasa Ruseckaite<sup>1</sup> PhD  
7

8  
9 **Author Affiliations:**

10  
11 <sup>1</sup>Department of Epidemiology and Preventive Medicine, Monash University, Melbourne,  
12  
13 Australia  
14

15  
16  
17 Corresponding author:

18 Rasa Ruseckaite

19  
20 Department of Epidemiology and Preventive Medicine, Monash University

21  
22 Address: 553 St Kilda Rd, Melbourne, VIC 3004, Australia

23  
24 Email: rasa.ruseckaite@monash.edu

25  
26 Telephone: +61 3 9903 0437  
27  
28  
29

30  
31 Word Count: Text 4383; Abstract 321

32  
33 Keywords: patient reported outcome measure, PROM, health-related quality of life, cystic  
34  
35 fibrosis  
36  
37  
38  
39  
40  
41  
42  
43  
44  
45  
46  
47  
48  
49  
50  
51  
52  
53  
54  
55  
56  
57  
58  
59  
60

## ABSTRACT

**Objectives:** The primary aim of this systematic review was to identify Patient Reported Outcome Measures (PROMs) used in adult and paediatric cystic fibrosis populations, to determine any that may be suitable for incorporation into the Australian Cystic Fibrosis Data Registry.

**Setting:** Articles were included from inpatient and outpatient settings.

**Participants:** Articles describing adult and paediatric patients with diagnosed cystic fibrosis were included.

**Primary and secondary outcome measures:** Primary outcome measure for this study was identifying PROMs in CF population. Secondary outcome measures were contexts in which PROMs have previously been used, administration methods of PROMs, assessed or stated validity and reliability of PROMs, acceptability of PROMs for patient population

**Results:** Twenty-seven different PROMs were identified. The most common PROMs were designed specifically for CF. Equal numbers of studies were conducted on adult (32%, n=31), paediatric (35%, n=34) and both (27%, n=26) populations. The two most widely used PROMs, the Cystic Fibrosis Questionnaire-Revised (CFQ-R) and the Cystic Fibrosis Quality of Life Questionnaire (CFQoL) demonstrated superior psychometric properties and acceptability in English-speaking populations. No PROMs were used within a clinical registry setting previously.

**Conclusions:** A range of PROMs are used in CF. We have identified two PROMs appropriate for ACFDR that will be used in a further qualitative study of CF patients and clinicians, to gain their perspectives on the instruments and the feasibility of incorporating a PROM into the ACFDR.

**PROSPERO registration:** CRD42019126931

## STRENGTHS AND LIMITATIONS OF THE STUDY

- Per our knowledge this is the first systematic review evaluating PROMs in adult and paediatric CF populations.
- This review involved a rigorous and extensive search of medical databases using clearly defined inclusion criteria and distinctly outlines how items will be selected and abstracted.
- The study will assess the most relevant and acceptable PROM for the context of a CF clinical registry.
- A limitation of this study is that the search was not conducted outside of medical databases, therefore may not capture studies examining PROM use in CF that are not published in peer reviewed journals.

## INTRODUCTION

Cystic Fibrosis (CF) has undergone significant changes in the last few decades. In the mid-1900s, the majority of CF patients did not survive beyond infancy. Now, over half of patients are adults<sup>1</sup> and life expectancy exceeds 40 in most developed countries.<sup>1</sup> The changing demographics of CF has led to new challenges in both disease management and clinical research. Treatment burden has increased<sup>2</sup> such that treatments currently require two to four hours a day.<sup>3</sup> The growing adult population encounters more difficulties balancing symptom and treatment burden of the disease with work, education or family demands.<sup>4, 5</sup> Therefore, there is an increasing requirement to examine and manage psychosocial impacts of CF.<sup>3</sup> Another challenge is posed by the relative healthiness of the modern CF population resulting in traditional endpoints in clinical trials, such as forced expiratory volume in one second (FEV1) and frequency of pulmonary exacerbations, having reduced sensitivity.<sup>6</sup>

A possible solution to these challenges is to monitor and collect data on health-related quality of life (HRQOL).<sup>7</sup> HRQOL is “an individual’s perception of their position in life in the context of the culture and value systems in which they live and in relation to their goals, expectations, standards and concerns”.<sup>8</sup> It encompasses physical health, social networks and relationships, psychological health, and functional capacity.<sup>8</sup> As HRQOL is subjective, it can be described using Patient-Reported Outcome Measures (PROMs).<sup>9</sup> PROMs are standardised sets of questions completed by patients without clinician interpretation.<sup>9</sup> PROMs have been used in a range of settings, from enhancing clinician-patient interaction to supporting health policy creation and economic analysis.<sup>10</sup> They are widely used in research; in observational studies to describe the impact of a disease on daily functioning, as tools for cost analysis of medical interventions<sup>2</sup> and the FDA have recommended HRQOL measures be used as outcomes in clinical trials.<sup>5</sup>

### **Australian Cystic Fibrosis Data Registry**

The Australian Cystic Fibrosis Data Registry (ACFDR) has been collecting data on Australian adults and children diagnosed with CF since 1998. In 2017 the ACFDR held records of 3151 patients,<sup>11</sup> estimated to be over 90% of Australia’s CF population.<sup>4</sup> The registry collects information on patients’ demographics, social functioning, physical health, treatments and mortality. In addition to increasing awareness about Australia’s CF population, the ACFDR has supported interventional and observational research and economic analysis.<sup>12</sup> The ACFDR enables national and international benchmarking<sup>12</sup> which has transformed models of care worldwide.<sup>4</sup>

PROMs evaluating HRQOL have been incorporated in Australian and international clinical registries.<sup>13-15</sup> In the US, PROM information is used to support observational studies which assess the association between patient demographics, disease burden and HRQOL.<sup>16</sup> In

1  
2  
3 Sweden, the national rheumatology registry enters its PROM data into a database to which  
4 patients and clinicians have access, so that patients are empowered to monitor their HRQOL  
5 and shared decision making is enhanced.<sup>15</sup> In Australia, PROMs evaluating HRQOL are  
6 currently incorporated in a number of state and national registries.<sup>17</sup> Information is used to  
7 monitor long term quality of life outcomes of treatments and complications,<sup>17</sup> to enable  
8 clinicians and health services to benchmark outcomes and ensure patient safety,<sup>14</sup> and to  
9 influence changes in clinical practice.<sup>14</sup>  
10  
11  
12  
13

14  
15 Integration of a PROM evaluating HRQOL into the ACFDR will reinforce the patient voice in  
16 data collection. PROMs in the ACFDR have the potential to be used for periodic review of  
17 aggregate HRQOL over time; to inform quality improvement for health services and  
18 clinicians; and for outcome measurement in registry-related clinical trials.<sup>10</sup> In order to fulfil  
19 these functions, any PROM selected for integration must be comprehensive in capturing all  
20 effects of CF on HRQOL. It must also have demonstrated good psychometric properties, be  
21 feasible to incorporate in ACFDR data collection and be acceptable to patients.  
22  
23  
24  
25

## 26 **AIMS**

27  
28 The primary aim of this review was to identify PROMs used in adult and paediatric CF  
29 populations, to determine any that may be suitable for incorporation into the ACFDR.  
30

31 Secondary aims were to examine:  
32

- 33 • Contexts in which PROMs are currently being used in CF (e.g. study design, setting);
- 34 • Methods of administration of PROMs (e.g. paper survey, electronic, interview, use of  
35 proxy-respondents);
- 36 • Assessed or stated psychometric properties of PROMs (e.g. reliability, validity,  
37 responsiveness);
- 38 • Acceptability of PROMs in adult and paediatric patient population.  
39  
40  
41  
42  
43  
44  
45  
46  
47  
48  
49  
50  
51  
52  
53  
54  
55  
56  
57  
58  
59  
60



## METHODS

A protocol for this systematic review was created following the Preferred Reporting Items for Systematic review and Meta-Analysis (PRISMA) guidelines.<sup>18</sup> The protocol was registered with PROSPERO (Registration number is CRD42019126931).

Eligibility and inclusion criteria are described in Table 1.

Table 1: Population, Intervention, Comparison, Outcome Research Strategy for Systematic Review

| PICO                | Description                                                                                                                                                                                                                                                                                                                                                                                                                  |
|---------------------|------------------------------------------------------------------------------------------------------------------------------------------------------------------------------------------------------------------------------------------------------------------------------------------------------------------------------------------------------------------------------------------------------------------------------|
| <b>Population</b>   | Adults and children with diagnosed CF                                                                                                                                                                                                                                                                                                                                                                                        |
| <b>Intervention</b> | Articles describing PROMs used to assess HRQOL in CF.<br><br>Articles describing both generic and disease-specific measures will be included.                                                                                                                                                                                                                                                                                |
| <b>Comparison</b>   | Studies without a comparator will be considered for inclusion                                                                                                                                                                                                                                                                                                                                                                |
| <b>Outcome</b>      | Primary outcome measure is: <ul style="list-style-type: none"> <li>• Identifying PROMs in CF population</li> </ul> Secondary outcome measures are: <ul style="list-style-type: none"> <li>• Contexts in which PROMs have previously been used</li> <li>• Administration methods of PROMs</li> <li>• Assessed or stated validity and reliability of PROMs</li> <li>• Acceptability of PROMs for patient population</li> </ul> |

### Inclusion criteria

Articles were included according to the following criteria:

- Study participants of all ages with a prior diagnosis of CF;
- Inpatients and outpatients;
- Study designs including quantitative (e.g. cohort, longitudinal, prospective, retrospective and validation) and qualitative studies (e.g. ethnography and case report)

## Exclusion criteria

Articles were excluded according to the following criteria:

- Published before January 2009;
- No article available in the English language;
- Conference abstracts;
- Editorials;
- Randomised Control Trials, as the same PROM was used for all and they provided limited additional information on secondary outcomes.

The review searched MEDLINE, EMBASE, Scopus, CINAHL, PsycINFO and Cochrane Library databases. The search strategy was adapted to each database and included keywords: “*patient reported outcome*” OR “*patient reported outcome measure*” OR “*self-report\**” OR “*questionnaire*” OR “*scale*” OR “*perception*” OR “*quality of life*” OR “*QOL*” AND “*cystic fibrosis.*” The search was restricted to English language, humans and last 10 years. Supplementary File 1 describes the search strategy for each database.

Endnote X7 was used to compile search results. Review documentation and search results were saved and backed up in Monash University faculty-allocated network storage (S-drive). Initial screening involved a reviewer reading titles and abstracts of all articles identified by the search. Any articles that clearly did not meet the inclusion criteria were removed. Full texts of remaining articles were then read by reviewers. The numbers of studies at each stage of the search were recorded using the PRISMA flow diagram.

A data extraction form was constructed to summarise selected studies in line with the outcomes of the systematic review. Information extracted included: type of study, mean age of participants, setting PROM(s) administered, method of administration, time points administered PROM(s) used, type of PROM(s), psychometric properties of PROM(s) and acceptability of PROM(s) to patients.

The COnsensus-based Standards for the selection of health Measurement INstruments (COSMIN) risk of bias checklist was used to assess methodological quality of included studies. This tool was chosen as it was specifically created for studies using PROMs.<sup>19</sup> One reviewer appraised studies using the tool. Items were rated on a four point scale denoted as very good, adequate, doubtful or inadequate. Results were summarised into a table presenting the lowest score for each property.<sup>19</sup>

A descriptive synthesis of results was undertaken, organised thematically by type of PROM and assessing context, administration, acceptability and reliability of each measure. A meta-analysis was not performed as included studies assess different outcomes.

## RESULTS

### Search results

The search yielded 5671 results. The numbers at each stage are summarised in Figure 1. A final number of 97 studies were included in the review. The data extraction table is presented in Supplementary File 3.

[Figure 1]

### Contexts in which PROMs were used

A large proportion (75%, n=73) of studies identified were of observational study design. Validation studies were the next most frequent, making up 14% (n=14) of all studies. Four narrative reviews and two systematic reviews were identified. The search also identified two non-randomised control trials, two qualitative studies and one study describing development of a PROM. Similar numbers of studies were conducted on adults (32%, n=31), children (35%, n=34) or both (27%, n=26) age groups.

Most studies recruited patients from a CF outpatient clinic (58%, n=56). Other studies used patient populations from: RCT data (7%, n=7), inpatients (6%, n=6), longitudinal cohort study data (5%, n=5) and national databases (4%, n=4). No study was conducted using clinical registry data. In 45% (n=44) of studies, PROM instruments were used in cross-sectional observational studies to evaluate whether there was an association between HRQOL and physical factors (e.g. sleep, physical fitness), psychological factors (e.g. self-esteem, illness perception), social factors (e.g. stigma, employment status) or demographic factors (e.g. age, gender). Other reasons for utilising PROMs were to assess HRQOL in a population (16%, n=16) or validate PROMs (16%, n=16).

### Mode and method of administration

PROMs were commonly self-reported on paper in clinic for 18% (n=17) of studies. Many studies (13%, n=13) used multiple methods of administration e.g. paper and interview. Less commonly, data was collected using electronic methods for 7% (n=7) of studies. Many studies (52%, n=50) did not state mode or method of PROM administration.

For 43 studies conducted on young children below 13 years of age, the most common method of administration for 33% (n=14) was self-report using instruments specially designed for use in young children. Interviews were used in 28% (n=12) of studies and parents were used as proxy respondents in 23% (n=10) of studies completed on paediatric populations. When studies assessed the degree of agreement between child self-report and parent-proxies, they found variable results. While some studies found a high level of agreement in parent-child reports,<sup>20, 21</sup> others found that parents were better able to report

1  
2  
3 HRQOL in observable domains, such as physical symptoms.<sup>22-25</sup> Two studies<sup>26, 27</sup> noted that  
4 parent-child agreement was better for younger children than older.  
5

6  
7 PROMs were administered once at the beginning of the study for the majority of studies  
8 (55%, n=50), which reflects the large proportion of cross-sectional studies. Several PROMs  
9 were administered twice (12%, n=11) and 15 (15%) studies applied PROMs longitudinally,  
10 between five to twelve times. The frequency of longitudinal administration varied from  
11 fortnightly<sup>28</sup> to 2 yearly.<sup>29</sup> Studies did not discuss the benefits of administering PROMs at  
12 their chosen frequencies. Dill et al.<sup>30</sup> applied the Cystic Fibrosis Questionnaire Revised  
13 (CFQ-R) every 3 months and found individual variation in each domain. This was not seen in  
14 a study that administered the EQ-5D every 8 weeks.<sup>31</sup> Abbott et al.<sup>32</sup> applied the Cystic  
15 Fibrosis Quality of Life Questionnaire (CFQoL) to the same patients over 12 years and  
16 observed a steady decrease of overall CFQoL score at 1% per year, which correlated with  
17 the decrease in FEV1%.  
18  
19  
20  
21  
22  
23

### 24 **Acceptability**

25  
26 Two studies assessing patient views towards PROMs found that parent caregivers were  
27 satisfied with the questionnaires.<sup>33, 34</sup> Salek et al.<sup>3</sup> observed that 76% of CF patients in their  
28 study would be willing to complete the CFQoL at every clinic visit. Overall, as most studies  
29 did not report the patient burden of PROMs to their patient populations, this review has  
30 found limited information on acceptability of PROMs for patients.  
31  
32  
33

### 34 **PROMs identified**

35  
36 This review identified 27 different PROMs evaluating HRQOL. These were CF-specific,  
37 respiratory-specific, mental health-specific or generic. Some studies (24%, n=23) used two  
38 or more different PROMs. CF-Specific PROMs were used more commonly than other types.  
39 The most common instrument used was CFQ-R, used in 51% (n=49) of studies.  
40  
41  
42

### 43 *CF-specific instruments*

44 Table 2 summarises the characteristics of CF-specific PROMs identified in this review.  
45  
46  
47  
48  
49  
50  
51  
52  
53  
54  
55  
56  
57  
58  
59  
60

Table 2: CF-specific PROMs

| PROM                                                                      | Studies Included | Year developed | Target population                            | Languages*                                                                                               | Number of items and domains                                                                                                                                                                                                                                                                     | Psychometric properties                                                                                                                                                                                                                                                                             |
|---------------------------------------------------------------------------|------------------|----------------|----------------------------------------------|----------------------------------------------------------------------------------------------------------|-------------------------------------------------------------------------------------------------------------------------------------------------------------------------------------------------------------------------------------------------------------------------------------------------|-----------------------------------------------------------------------------------------------------------------------------------------------------------------------------------------------------------------------------------------------------------------------------------------------------|
| Cystic Fibrosis Questionnaire - Revised <sup>28, 35-41</sup>              | 49               | 2003           | Teen/ adult<br>Adolescent<br>Child<br>Parent | English<br>Polish<br>German<br>Hungarian<br>Dutch<br>Hindi<br>Portugese<br>Spanish<br>Swedish<br>Turkish | Number of Items:<br>Adult: 50<br>Adolescent: 35<br>Child: 35<br>Parent: 44<br><br>Domains: Physical, vitality, emotion, social, role/ school, body image, treatment burden, health perceptions, weight, respiratory, digestion                                                                  | Reliability: $\alpha > 0.7$ except treatment burden and social functioning domains in some studies<br><br>Test retest reliability** > 0.6<br><br>Validity: Known groups validity with FEV1, age and BMI.<br><br>Ceiling effects: Eating disturbances (46.4%), Body Image (39.6%), Digestion (37.2%) |
| Cystic Fibrosis Quality of Life Questionnaire <sup>3, 29, 32, 42-49</sup> | 14               | 2000           | Adult                                        | English<br>Polish<br>Greek<br>Portugese                                                                  | Adult: 52<br><br>Domains: Physical, social, treatment, emotional, relationships, career, future, chest symptoms, body image                                                                                                                                                                     | Reliability: $\alpha: 0.72 - 0.95$<br><br>Test retest reliability > 0.7<br><br>Validity: All domains correlated with FEV2, sensitive to change over time                                                                                                                                            |
| Cystic Fibrosis Questionnaire <sup>27, 50-55</sup>                        | 7                | 1997           | Teen/ adult<br>Child<br>Parent               | English<br>German<br>Dutch<br>Portugese                                                                  | Number of Items:<br>Adult: 48<br>Adolescent:<br>Child: 35<br>Parent: 44<br><br>Domains: Physical functioning, vitality, emotional state, social limitations, role/ school, body image, treatment constraints, embarrassment, eating disturbances, health status, weight, respiratory, digestion | Reliability: $\alpha=0.62 - 0.93$ for most domains in adult and child questionnaires<br><br>Validity: Some domains correlated with FEV1                                                                                                                                                             |

| PROM                                                     | Studies Included | Year developed | Target population | Languages* | Number of items and domains                                                | Psychometric properties                                                                                                                          |
|----------------------------------------------------------|------------------|----------------|-------------------|------------|----------------------------------------------------------------------------|--------------------------------------------------------------------------------------------------------------------------------------------------|
| DISABKIDS-CFM <sup>34, 56</sup>                          | 2                | 2013           | Child Parent      | Portugese  | Number of items: 10<br>Domains: Impact, Treatment                          | Reliability: $\alpha$ : 0.71 - 0.76<br>Validity: Good convergent and divergent validity assessed by MTMM<br>Ceiling effects: 27.5% impact domain |
| CF Symptom Diary <sup>57</sup>                           | 1                | 2009           | Child             | English    | Number of items: 16<br>Domains: Symptom, emotional impact, activity impact | Not reported                                                                                                                                     |
| Cystic Fibrosis Respiratory Symptom Diary <sup>26</sup>  | 1                | 2018           | Child             | English    | Number of items: 17<br>Domains: Respiratory signs, CF-related impacts      | Validity: Discriminates between sick and well CF patients                                                                                        |
| Res-CF <sup>58</sup>                                     | 1                | 2017           | Adult             | English    | Number of items: 4 (VAS)                                                   | Test retest reliability** > 0.7 for 3/4 items<br>Validity: Correlates with CFQ-R and responsive to changes in health                             |
| Cystic Fibrosis Symptom Progression Survey <sup>33</sup> | 1                | 2015           | Child             | Arabic     | Number of items: 10                                                        | Reliability: $\alpha$ = 0.76<br>Validity: Content validity demonstrated using factor analysis                                                    |

\* Languages included in this review

\*\*Test-retest reliability measured by intraclass correlation coefficient

MTMM: Multitrait multimethod matrix

1  
2  
3 CFQ-R was the most commonly used PROM in this review. It is widely used as it includes  
4 scales for children (6-11 years), adolescents (12-13 years), teens/adults (14+ years) and  
5 parents. This PROM is a revised version of the original Cystic Fibrosis Questionnaire  
6 (CFQ).<sup>38</sup> The CFQ was developed in France in 1997<sup>59</sup> and minor revisions were performed  
7 by Wenniger et al.<sup>60</sup> in 2003 due to inadequate psychometric properties found during  
8 validation of the German translation. As well as being the preferred tool in English speaking  
9 countries,<sup>5</sup> the CFQ-R has been translated into 36 different languages.<sup>2</sup> Gancz et al.<sup>61</sup>  
10 reported that the CFQ-R was generally completed in 10-30 minutes.  
11

12  
13  
14  
15  
16 Studies demonstrated generally good psychometric properties of the CFQ-R. When  
17 considering only the scales in English, internal consistency evaluated by Cronbach alpha  
18 ranged from 0.62 – 0.93<sup>36-38, 40</sup> for adult and child questionnaires and 0.55 – 0.75 for parent  
19 questionnaires.<sup>62</sup> Studies reported that the treatment burden, body image and school  
20 functioning domains were exceptions.<sup>25, 36, 38, 40</sup> Validity was demonstrated by the association  
21 between several CFQ-R domains and clinical parameters, in particular FEV1<sup>30, 38, 63-67</sup> and  
22 BMI (Body Mass Index).<sup>66, 67</sup> Longitudinal studies have shown that CFQ-R is sensitive to  
23 changes to HRQOL with antibiotic treatment<sup>35</sup> or over the course of a year.<sup>68</sup> Authors  
24 suggested it could predict survival<sup>42</sup> and be a determinant for lung transplantation.<sup>69</sup> Content  
25 validity was acceptable.<sup>25, 70</sup>  
26

27  
28  
29  
30  
31  
32 The CFQoL was the second most commonly used PROM. It has only been developed for  
33 adult populations. Salek et al.<sup>3</sup> found an average nine minute completion time and that the  
34 majority of patients found the instrument acceptable for completion in every clinic  
35 appointment. Studies identified in our search described robust psychometric properties of  
36 the CFQoL. Reliability measured by Cronbach alpha ranged from 0.72 – 0.95<sup>32, 45</sup> for all  
37 domains. It was correlated with generic measures, Short Form Questionnaire (SF36) and UK  
38 Sickness Impact Profile (UKSIP),<sup>3, 32</sup> and Schwachman-Kulczycki score, a clinician reported  
39 outcome measure.<sup>43</sup> Discriminant validity has been demonstrated by significantly worse  
40 CFQoL scores in CF patients than in controls.<sup>47</sup> Studies demonstrated correlation between  
41 CFQoL domains and FEV1,<sup>3, 32, 46</sup> however one study did not find a significant correlation.<sup>71</sup>  
42

43  
44  
45  
46  
47  
48  
49 Other CF specific PROMs identified included the CFQ, which was the first CF-specific  
50 PROM developed and has child, teen/adult and parent versions.<sup>38</sup> Studies demonstrated  
51 good internal consistency of most domains,<sup>55,27</sup> with the exception of treatment burden  
52 domain in all versions, social functioning domain in child and adult, and eating and digestion  
53 domains in adult and parent versions.<sup>27</sup> The DISABKIDS- CF Module, which was developed  
54 for children was used in two studies conducted in Brazil. Good internal consistency was  
55 demonstrated<sup>34, 56</sup> but one study found a ceiling effect and low test-retest reliability.<sup>56</sup> Several  
56 CF-specific PROMs were developed or initially validated during the last decade. These  
57  
58  
59  
60

1  
2  
3 included the CF Respiratory Symptom Diary (CFRSD),<sup>26</sup> CF Symptom Progression Survey  
4 (CF-SPS),<sup>33</sup> CF Symptom Diary<sup>57</sup> and the Respiratory Symptoms in CF (ReS-CF).<sup>58</sup>  
5  
6

### 7 *Respiratory specific PROMs*

8 Several HRQOL PROMs developed for chronic respiratory conditions were used in CF.  
9 These included the Leicester Cough Questionnaire (LCQ),<sup>58, 72</sup> St George's Respiratory  
10 Questionnaire (SGRQ),<sup>73, 74</sup> the Sinus and Nasal Quality of Life Survey (SN-5),<sup>75, 76</sup> the Sino-  
11 Nasal Outcome Test (SNOT-22)<sup>77</sup> and the Liverpool Respiratory Symptom Questionnaire  
12 (LRSQ).<sup>6</sup> The SN-5 and SNOT-22 exclusively assess sinus symptoms.<sup>75-77</sup> The other  
13 respiratory PROMs, LCQ, SGRQ and LRSQ were originally piloted in patients with asthma<sup>78</sup>  
14 or chronic cough.<sup>79</sup> The LCQ, SGRQ and LRSS demonstrated acceptable reliability<sup>6, 58, 74</sup> and  
15 were found to correlate with CFQ-R domains<sup>58, 72</sup> and lung function tests.<sup>6, 73</sup> However, two  
16 studies found ceiling effects with the LCQ.<sup>58, 72</sup> Reliability of the SN-5 and SNOT-22 were not  
17 assessed, but SNOT-22 demonstrated floor effects<sup>77</sup> and the validity of SN-5 has not been  
18 assessed in CF.<sup>76</sup>  
19  
20  
21  
22  
23  
24  
25

### 26 *Mental health specific PROMs*

27 The most common mental health specific PROM identified was the Hospital Anxiety  
28 Depression Scale (HADS), which was used in eight observational studies in Europe and US.  
29 The instrument was reported to take 15 – 20 minutes to complete.<sup>48</sup> Studies found good  
30 reliability assessed by Cronbach alpha.<sup>36, 80</sup> Yohannes et al.<sup>48</sup> found good test-retest  
31 reliability and correlation with CFQoL. The HADS was used to show increased anxiety and  
32 depression in CF patients compared to the non-CF population.<sup>81</sup> Other HRQOL surveys  
33 focused on mental health identified were the Patient Health Questionnaire (PHQ-9), General  
34 Health Questionnaire (GHQ) and General Anxiety Disorder (GAD-7). Each was used in one  
35 study and found to have acceptable reliability,<sup>74, 82</sup> however validity was not assessed.  
36  
37  
38  
39  
40  
41  
42

### 43 *Generic Instruments*

44 Table 3 describes characteristics of generic instruments included in this study.  
45  
46  
47  
48  
49  
50  
51  
52  
53  
54  
55  
56  
57  
58  
59  
60



Table 3: Generic PROMs

| PROM                                                               | Number of Studies included | Year developed | Target population | Languages*                                                                             | Number of items and domains                                                                                                                                                                                               | Psychometric properties                                                                                          |
|--------------------------------------------------------------------|----------------------------|----------------|-------------------|----------------------------------------------------------------------------------------|---------------------------------------------------------------------------------------------------------------------------------------------------------------------------------------------------------------------------|------------------------------------------------------------------------------------------------------------------|
| EQ-5D <sup>21, 31, 52, 63, 83-85</sup>                             | 7                          | 1990           | Adult<br>Child    | English<br>French<br>German<br>Hungarian<br>Italian<br>Spanish<br>Swedish<br>Bulgarian | Number of items: 5<br><br>Domains: mobility, self-care, usual activities, pain/ discomfort, anxiety/depression                                                                                                            | Validity: Discriminates between CF and non-CF population<br><br>Ceiling effects: 44 - 67%                        |
| Paediatric Quality of Life Inventory <sup>20, 22, 23, 35, 86</sup> | 5                          | 1998           | Child             | English<br>Hungarian<br>Persian                                                        | Number of items: 23<br><br>Domains: Physical, Emotional, School, Social                                                                                                                                                   | Reliability: $\alpha = 0.68 - 0.93$<br><br>Validity: Discriminates between CF and asthma or non-CF population    |
| Short Form-36 <sup>42, 73, 74, 87</sup>                            | 4                          | 1990           | Adult<br>Child    | English<br>German<br>Italian<br>Polish                                                 | Number of items: 36<br><br>Domains: Physical functioning, role-physical, role - emotional, bodily pain, general health, vitality, social functioning, mental health                                                       | Known groups validity with age and time after lung transplant<br><br>Ceiling effects up to 67.7% in some domains |
| UK Sickness Impact Profile <sup>3</sup>                            | 1                          | 1975           | Adult             | English                                                                                | Number of items: 136<br><br>Domains: Sleep and rest, eating, work, home management, recreation and pastimes, ambulation, mobility, body care, social interaction, alertness behaviour, emotional behaviour, communication | Reliability: $\alpha = 0.87 - 0.9$<br>Test retest reliability 0.57 - 0.84<br><br>Convergent validity with CFQoL  |

| PROM                                                          | Number of Studies included | Year developed | Target population | Languages* | Number of items and domains                                                                                                           | Psychometric properties        |
|---------------------------------------------------------------|----------------------------|----------------|-------------------|------------|---------------------------------------------------------------------------------------------------------------------------------------|--------------------------------|
| World Health Organisation Quality of Life scale <sup>43</sup> | 1                          | 1996           | Adult             | Portugese  | Number of items: 26<br>Domains: Physical health, psychological, social relationships, environment                                     | Not reported                   |
| Single Item Scale <sup>48</sup>                               | 1                          | 2011           | Adult             | English    | Number of items: 1                                                                                                                    | Test retest reliability 0.78   |
| Quality of Life Profile for the Chronically Ill <sup>73</sup> | 1                          | 2000           | Adult             | German     | Number of items: 40<br>Domains: Physical capacity, psychological capacity, social capacity, psychological wellbeing, social wellbeing | Not reported                   |
| Core Outcome Measures <sup>37</sup>                           | 1                          | 1993           | Adult             | English    | Number of items: 34<br>Domains: Wellbeing, symptoms, functioning, risk                                                                | Convergent validity with CFQ-R |
| KINDL <sup>70</sup>                                           | 1                          | 1994           | Child             | Turkish    | Number of items: 40<br>Domains: psychosocial wellbeing, physical state, social relationships, functional capacity(76)                 | Convergent validity with CFQ-R |

\*Languages included in this review \*\*Test-retest reliability measured by intraclass correlation coefficient

1  
2  
3 The most common generic instrument was the EQ-5D questionnaire, which was developed  
4 to enable economic evaluations based on HRQOL scores. It was utilised in six observational  
5 studies in adult and paediatric populations.<sup>21, 31, 52, 63, 83-85</sup> This review found EQ-5D was  
6 reliable<sup>63</sup> and correlated with CFQ-R<sup>84</sup> and FEV1.<sup>63</sup> The PROM distinguished HRQoL  
7 differences in CF and non-CF populations<sup>83</sup> and was sensitive to change during pulmonary  
8 exacerbation<sup>84</sup> and recovery.<sup>31</sup> However, studies found a large proportion of patients  
9 reporting no problems with EQ-5D,<sup>31, 52</sup> demonstrating that it may not be sensitive in  
10 collecting HRQOL data from CF patients.  
11  
12  
13  
14  
15

16 A similar finding was observed in the Short Form Survey (SF-36), which was used in four  
17 European studies on adult populations.<sup>47, 73, 74, 88</sup> The instrument demonstrated robust  
18 psychometric properties; Cronbach alpha of 0.95<sup>74</sup> and discriminated between CF and non-  
19 CF populations.<sup>47, 74</sup> However Abbott et al.<sup>88</sup> found a high proportion of participants reporting  
20 no problems and that the instrument was less sensitive to clinical deterioration than the  
21 CFQoL.  
22  
23  
24  
25

26 The Paediatric Quality of Life Inventory (PedsQL) is a generic HRQOL instrument developed  
27 for children with paediatric cancers.<sup>89</sup> The PedsQL demonstrated good internal  
28 consistency,<sup>20</sup> discriminant validity comparing asthma and CF and correlated with BMI.<sup>35</sup>  
29 Other generic HRQOL PROMs described in adult populations were the World Health  
30 Organisation Quality Of Life scale (WHOQOL-BREF),<sup>43</sup> Core Outcome Measures tool  
31 (CORE-OM),<sup>37</sup> United Kingdom Sickness Impact Profile (UKSIP),<sup>3</sup> KINDL and the Quality of  
32 Life Profile for the Chronically Ill (PLC).<sup>73</sup> These instruments were each used in one  
33 observational study. Psychometric properties were not evaluated in included studies.  
34  
35  
36  
37  
38

### 39 **Risk of Bias**

40 The COSMIN Risk of Bias checklist is designed to critically appraise studies evaluating the  
41 reliability or validity of PROMs. A number of studies in this review did not validate  
42 instruments for their study population and relied on previous reliability and validity statistics  
43 for the PROM used. Therefore, these studies were not critically appraised. The results of  
44 critical appraisal are summarised in Supplementary File 2.  
45  
46  
47  
48

49 Critically appraising articles using the COSMIN checklist enables reviewers to discern  
50 whether psychometric properties have been evaluated using appropriate methodology. From  
51 this, reviewers can determine whether the information reported on psychometric properties  
52 of PROMs is trustworthy. For example, the second most commonly evaluated property  
53 'Internal Consistency' frequently received optimal scores, demonstrating that researchers  
54 were in line with COSMIN recommendations and that 'Internal Consistency' reported is  
55 generally reliable. However, the most commonly reported property 'Hypothesis Testing for  
56  
57  
58  
59  
60

1  
2  
3 Construct Validity' received variable scores, demonstrating a lack of reliability in interpreting  
4 this statistic.  
5

## 6 **DISCUSSION**

### 7 **Contexts in which PROMs were used**

8  
9  
10 This review identified that PROMs are used in a variety of settings in CF. PROMs were most  
11 commonly used in observational studies, where they assessed the impact of physical,  
12 psychological, social or demographic variables on HRQOL. No studies implemented a  
13 PROM in a clinical registry or used clinical registry data.  
14  
15

16  
17 The lack of PROM use in CF clinical registries may be due to feasibility issues, including  
18 cost and time burden on patients and clinicians, or due to limitations of existing PROMs. One  
19 limitation may be the length of commonly used CF-specific PROMs, which could reduce  
20 patient compliance and increase data entry burden. Newly developed CF-specific PROMs  
21 identified in this study were substantially shorter,<sup>33, 49, 58</sup> demonstrating that researchers  
22 require less burdensome CF-specific PROMs. Another limitation may be inadequacy of  
23 paediatric measures as currently, no validated PROMs exists to measure data in 0-6 year  
24 olds.<sup>26</sup> This review identified researchers validating or developing PROMs for younger  
25 patient populations.<sup>26, 33, 56</sup>  
26  
27  
28  
29  
30

### 31 **Mode and methods of administration**

32  
33 The mode of administration of the selected PROM will be a major determinant of patient  
34 adherence and completion rates<sup>9</sup>. Studies in this review used paper based methods most  
35 frequently. However, electronic or online administration is reported to have higher patient  
36 adherence,<sup>9</sup> avoid the need for manual data entry and be more cost effective in the long  
37 term than paper methods.<sup>90</sup>  
38  
39  
40

41  
42 For paediatric populations, the most common method of administration was self-reporting,  
43 using instruments specially designed for use in children. Proxy reporting was uncommon and  
44 studies investigating the consistency of parent and child results found that it was better for  
45 observable symptoms<sup>22-25</sup> and younger children.<sup>26, 27</sup> Edwards et al.<sup>26</sup> hypothesised this  
46 finding was because parents are more involved in care for younger children and therefore  
47 have a better understanding of their HRQOL.  
48  
49  
50

51  
52 This review demonstrated the advantages of longitudinal PROM collection, as associations  
53 between physical and sociodemographic characteristics and quality of life were seen in  
54 studies undertaken over a decade,<sup>29, 32</sup> which weren't seen over 12 or 18 month periods.<sup>30</sup>  
55 However, where PROMs captured longitudinally, there was a range of frequencies of  
56 administration, demonstrating a lack of consensus on the most appropriate time required  
57 between PROM administration. Studies generally did not report information on the  
58  
59  
60

effectiveness of the frequency of administration in demonstrating changes in HRQOL. Further evaluation of the most useful and acceptable time points of administration must be conducted prior to incorporation of a PROM into the ACFDR.

### **PROMs identified**

Our review identified that PROMs developed specifically for CF are more commonly used for CF patients than generic PROMs. Generic PROMs, which ask about health domains relevant to everyone, have the advantage of applicability across all populations.<sup>14</sup> Therefore, they were used to compare different diseases and in cost-analysis and resource allocation decisions.<sup>21, 83</sup> CF-specific PROMs include an assessment of CF symptoms that are not relevant in non-CF populations,<sup>14</sup> therefore have comparatively limited uses in health policy. However, this review found that CF-specific PROMs are more responsive to changes in health<sup>9</sup> and better correlated to clinical parameters<sup>22, 91</sup> compared to generic PROMs. Significant ceiling effects found using EQ-5D<sup>31</sup> or SF-36<sup>88</sup> suggest these generic instruments are not capturing problems faced by the CF population. Specific PROMs can therefore give more clinically relevant information than generic<sup>2, 9</sup> and better compare outcomes within CF populations.<sup>92</sup>

A number of symptom-specific PROMs were identified in our review that assessed respiratory symptoms or mental health. Use of these PROMs in CF is limited as CF affects all four domains of HRQOL, and in addition can have respiratory and gastrointestinal complications. While it is important to assess depression and anxiety in CF, evaluating only these symptoms will not enable a holistic picture of HRQOL.

### **Choosing a PROM for the ACFDR**

The ACFDR was established to facilitate varying research methodologies and impart accurate information on the current outcomes of Australia's CF population.<sup>4</sup> One of its key functions, providing feedback of outcomes for clinicians and health services, is critical for the ongoing improvement of care.<sup>93</sup> The inclusion of CF-specific domains in the chosen tool is therefore essential, as these domains will be most directly affected by changes in treatment and therefore will be the most useful information to feedback to clinicians. Similarly this CF symptom information will be relevant for pharmaceutical companies or researchers following up the long term outcomes of treatment and complications. In addition, ensuring that PROM data captures all aspects of HRQOL will enable it to be widely used in research. Therefore, it is most appropriate to include a CF-specific PROM.

After evaluating PROMs based on the predetermined criteria for incorporation into the ACFDR; comprehensiveness, robust psychometric properties, feasibility and acceptability, the CFQ-R and CFQoL come closest to achieving this criteria. They are comprehensive as

1  
2  
3 they include both general and CF-specific domains. This review establishes satisfactory  
4 psychometric properties for these two instruments.  
5

6  
7 A major limitation to incorporating either PROM into the ACFDR is the length of the  
8 instruments, which may dissuade patients from participating in data collection or completing  
9 the instrument. This poses a difficulty, as a large amount of missing data may cause  
10 collection of PROM data to become ineffectual. However, if patients believe that measuring  
11 HRQOL is useful to them, they may complete the instrument regardless of its length. At the  
12 Duke Cancer Institute in US, patients in solid tumour clinics have less than 5% missing data  
13 for a survey with median completion time of 11 minutes.<sup>90</sup> Communication of the beneficial  
14 outcomes to patients, clinicians and researchers of HRQOL data collection may influence  
15 patients to regard completing the instrument as important to them.  
16  
17

18  
19 Both of the selected CF PROM tools are also the oldest specific instruments developed in  
20 CF.<sup>94, 95</sup> There is a possibility of longevity bias if these PROMs are most commonly used in  
21 CF because they are well-known, rather than superior instruments. Another concern is that  
22 as the demographics and outcomes of CF have changed considerably since these  
23 instruments were first developed, their relevance to the current population may be limited. In  
24 addition, the PROM selected for the ACFDR must also be applicable to future populations,  
25 so that registry data collection remains consistent.<sup>90</sup> However, both the CFQ-R and CFQoL  
26 demonstrated the most robust psychometric properties of all the PROMs and recent studies  
27 that used these instruments reported no requirement for modification,<sup>28, 46, 86, 96</sup> so it can be  
28 concluded they are currently relevant to the CF population.  
29  
30  
31  
32  
33  
34  
35  
36  
37

### 38 **Limitations of the review**

39 This systematic review has a number of limitations. The lack of information on the use of  
40 PROMs in registries may be because a grey literature search was not conducted. However,  
41 it may also occur because PROMs have been incorporated in registries in CF but not  
42 reported or because no other CF registry has begun the process of incorporating PROMs.  
43 Researchers also excluded randomised controlled trials (RCTs) from this review, which  
44 limited our results on the extent of PROM use in CF research. However, this enabled a focus  
45 on observational studies, which have data collection methods more closely resembling  
46 clinical registries. Furthermore, during the initial searches for this topic, RCTs were found to  
47 only use the CFQ-R and not report on administration methods, psychometric properties or  
48 patient perspectives of PROMs.  
49  
50  
51  
52  
53  
54

55 Another limitation is the lack of information identified on the views of CF patients and  
56 caregivers on the relevance of PROMs, their clarity and structure, ease of use and whether  
57 completing PROMs was emotionally burdensome. This information is important because  
58  
59  
60

1  
2  
3 symptoms and treatments are already emotionally and physically demanding, therefore a  
4 time-consuming and difficult questionnaire should not be imposed on patients. In addition,  
5 giving a questionnaire that is meaningful to patients and clinicians is essential to ensure  
6 compliance and guarantee complete data collection. Acceptability may be affected by  
7 multiple factors including the PROM used and its method and frequency of administration.  
8  
9

10  
11 In order to overcome these limitations, researchers will conduct a further feasibility and  
12 acceptability study to identify patient and clinician perspectives toward incorporation of either  
13 the CFQ-R or CFQoL into the ACFDR.  
14  
15

## 16 17 **CONCLUSION**

18 This review aimed to identify whether existing HRQOL instruments are suitable for  
19 incorporation in the registry and to gain an understanding of the use of PROMs in CF. We  
20 found that PROMs are widely used in CF, but there is a lack of reporting on methods of  
21 administration and time points. We have identified two PROMs appropriate for ACFDR that  
22 will be used in a further qualitative study of CF patients and clinicians, to gain their  
23 perspectives on the instruments and the feasibility of incorporating a PROM into the ACFDR.  
24  
25  
26  
27  
28  
29  
30

31 **Funding:** No funding received.

32 **Competing interests:** None declared.

33 **Patient and Public Involvement:** It was not possible to include patients or the public in this  
34 study  
35  
36

37 **Data Availability:** No additional data available  
38  
39

40 **Author contributions:** All authors developed the protocol for this systematic review. One  
41 author (IR) conducted the screening, critical appraisal and data extraction. All authors  
42 assisted in write up of results.  
43  
44  
45  
46  
47  
48  
49  
50  
51  
52  
53  
54  
55  
56  
57  
58  
59  
60

## REFERENCES

1. Quittner AL, Saez-Flores E, Barton JD. The psychological burden of cystic fibrosis. *Curr Opin Pulm Med* 2016;22(2):187-91.
2. Ratjen F, Bell SC, Rowe SM et al. Cystic fibrosis. *Nat Rev Dis Primers* 2015;1:15010. doi:10.1038/nrdp.2015.10.
3. Salek MS, Jones S, Rezaie M, et al. Do patient-reported outcomes have a role in the management of patients with cystic fibrosis? *Front Pharmacol* 2012;3. <https://www.ncbi.nlm.nih.gov/pmc/articles/PMC3298894/> (accessed 20 Mar 2019) doi: 10.3389/fphar.2012.00038
4. Bell SC, Bye PTP, Cooper PJ, et al. Cystic fibrosis in Australia, 2009: results from a data registry. *Med J Aust* 2011;195(7):396-400.
5. Royce FH, Carl JC. Health-related quality of life in cystic fibrosis. *Curr Opin Pediatr* 2011;23(5):535-40. doi: 10.1097/MOP.0b013e32834a7829
6. Trinick R, Southern KW, McNamara PS. Assessing the Liverpool Respiratory Symptom Questionnaire in children with cystic fibrosis. *Eur Respir J*. 2012;39(4):899-905. doi: 10.1183/09031936.00070311
7. Elborn JS. Cystic fibrosis. *The Lancet* 2016;388(10059):2519-31. doi: [https://doi.org/10.1016/S0140-6736\(16\)00576-6](https://doi.org/10.1016/S0140-6736(16)00576-6)
8. World Health Organisation. WHOQOL-BREF : introduction, administration, scoring and generic version of the assessment: field trial version, December 1996. Geneva; World Health Organisation; 1996.
9. Blackwell LS, Marciel KK, Quittner AL. Utilization of patient-reported outcomes as a step towards collaborative medicine. *Paediatr Respir Rev* 2013;14(3):146-51.
10. Williams K, Sansoni J, Morris D. Patient-reported outcome measures: Literature review. Sydney; Australian Commission for Safety and Quality in Health Care; 2016
11. Ruseckaite R, Ahern S, Ranger T et al. Australian Cystic Fibrosis Data Registry Annual Report, 2017. Melbourne; Monash University Department of Epidemiology and Preventive Medicine; 2019
12. Ahern S, Sims G, Earnest A, S CB. Optimism, opportunities, outcomes: the Australian Cystic Fibrosis Data Registry. *Intern Med J* 2018;48(6):721-3.
13. Devlin N, Appleby J, Buxton M, et al. Getting the most out of PROMs. London; The King's Fund; 2010
14. Collecting Patient Reported Outcomes Measures in Victoria Consultation Paper. Melbourne; Department of Health and Human Services; 2016
15. Nelson EC, Eftimovska E, Lind C, et al. Patient Reported Outcome Measures in Practice. *BMJ* 2015;350. [www.jstor.org/stable/26518240](http://www.jstor.org/stable/26518240) (accessed 8 Apr 2019) doi: 10.1136/bmj.g7818
16. Weitzman ER, Wisk LE, Salimian PK, et al. Adding patient-reported outcomes to a multisite registry to quantify quality of life and experiences of disease and treatment for youth with juvenile idiopathic arthritis. *J Patient Rep Outcomes*. 2018;2(1). <https://link.gale.com/apps/doc/A554974377/AONE?u=monash&sid=AONE&xid=3b2bd1a0> (accessed 8 Apr 2019) doi: <http://dx.doi.org.ezproxy.lib.monash.edu.au/10.1186/s41687-017-0025-2>
17. Thompson C, Sansoni J, Morris D, et al. Patient-reported Outcome Measures: An environmental scan of the Australian healthcare sector. Sydney; Australian Commission on Safety and Quality in Health Care; 2016
18. Moher D, Shamseer L, Clarke M, et al. Preferred reporting items for systematic review and meta-analysis protocols (PRISMA-P) 2015 statement. *Syst Rev* 2015;4(1):1. doi: <http://dx.doi.org.ezproxy.lib.monash.edu.au/10.1186/2046-4053-4-1>
19. Mookkink LB, Terwee CB, Patrick DL, et al. COSMIN checklist manual. *Qual Life Res* 2018;27(5):1171-1179. doi: 10.1007/s1136-017-1765-4 [Published Online First: 19 December 2017]
20. Bodnar R, Kadar L, Szabo L, et al. Health Related Quality of Life of Children with Chronic Respiratory Conditions. *Adv Clin Exp Med*. 2015;24(3):487-95. doi: 10.17219/acem/24991



21. Chevreul K, Berg Brigham K, Michel M, et al. Costs and health-related quality of life of patients with cystic fibrosis and their carers in France. *J Cyst Fibros* 2015;14(3):384-91. doi: <http://dx.doi.org/10.1016/j.jcf.2014.11.006>
22. Driscoll KA, Modi AC, Filigno SS, et al. Quality of life in children with CF: Psychometrics and relations with stress and mealtime behaviors. *Pediatr Pulmonol* 2015;50(6):560-7. doi: 10.1002/ppul.23149
23. Kianifar HR, Bakhshoodeh B, Hebrani P, et al. Quality of Life in Cystic Fibrosis Children. *Iran J Pediatr* 2013;23(2):149-53.
24. Kir D, Gupta S, Jolly G, et al. Health Related Quality of Life in Indian Children with Cystic Fibrosis. *Indian Pediatr* 2015;52(5):403-8.
25. Schmidt A, Wenninger K, Niemann N, et al. Health-related quality of life in children with cystic fibrosis: validation of the German CFQ-R. *Health Qual Life Outcomes* 2009;7:97. doi: 10.1186/1477-7525-7-97
26. Edwards TC, Emerson J, Genatossio A, et al. Initial development and pilot testing of observer-reported outcomes (ObsROs) for children with cystic fibrosis ages 0-11 years. *J Cyst Fibros* 2018;17(5):680-6. doi: <https://doi.org/10.1016/j.jcf.2017.12.008>
27. Tluczek A, Becker T, Grieve A, et al. Health-related quality of life in children and adolescents with cystic fibrosis: convergent validity with parent-reports and objective measures of pulmonary health. *J Dev Behav Pediatr* 2013;34(4):252-61.
28. Flume PA, Suthoff ED, Kosinski M, et al. Measuring recovery in health-related quality of life during and after pulmonary exacerbations in patients with cystic fibrosis. *J Cyst Fibros*. 2018. <https://www.sciencedirect-com.ezproxy.lib.monash.edu.au/science/article/pii/S1569199318309421> [accessed 25 Mar 2019] doi: <https://doi.org/10.1016/j.jcf.2018.12.004>
29. Abbott J, Morton AM, Hurley MA, et al. Longitudinal impact of demographic and clinical variables on health-related quality of life in cystic fibrosis. *BMJ Open* 2015;5(5):e007418. [https://bmjopen.bmj.com/content/5/5/e007418?utm\\_source=trendmd&utm\\_medium=cpc&utm\\_campaign=bmjopen&trendmd-shared=1&utm\\_content=Journalcontent&utm\\_term=TrendMDPhase4](https://bmjopen.bmj.com/content/5/5/e007418?utm_source=trendmd&utm_medium=cpc&utm_campaign=bmjopen&trendmd-shared=1&utm_content=Journalcontent&utm_term=TrendMDPhase4) [accessed 20 Mar 2019] doi:10.1136/bmjopen-2014-007418
30. Dill EJ, Dawson R, Sellers DE, et al. Longitudinal trends in health-related quality of life in adults with cystic fibrosis. *Chest* 2013;144(3):981-9. doi: 10.1378/chest.12-1404
31. Solem CT, Vera-Llonch M, Liu S, et al. Impact of pulmonary exacerbations and lung function on generic health-related quality of life in patients with cystic fibrosis. *Health Qual Life Outcomes* 2016;14:63. doi: 10.1186/s12955-016-0465-z
32. Abbott J, Hurley MA, Morton AM, et al. Longitudinal association between lung function and health-related quality of life in cystic fibrosis. *Thorax* 2013;68(2):149-54. doi:10.1136/thoraxjnl-2012-202552
33. Norrish C, Norrish M, Fass U, et al. The Cystic Fibrosis Symptom Progression Survey (CF-SPS) in Arabic: A Tool for Monitoring Patients' Symptoms. *Oman Med J* 2015;30(1):17-25.
34. de Souza Serio dos Santos DM, Deon KC, Fegadolli C, et al. Cultural adaptation and initial psychometric properties of the DISABKIDS®- Cystic Fibrosis Module - Brazilian version. *Rev Esc Enferm USP* 2013;47(6):1311-7 doi: 10.1590/S0080-623420130000600009
35. Modi AC, Lim CS, Driscoll KA, et al. Changes in pediatric health-related quality of life in cystic fibrosis after IV antibiotic treatment for pulmonary exacerbations. *J Clin Psychol Med Settings*. 2010;17(1):49-55.
36. Oliver KN. Longitudinal study of perceived stigma, disclosure, and optimism in adolescents and adults living with cystic fibrosis: Measuring the impact on psychological and physical health. Dissertation Abstracts International: Section B: The Sciences and Engineering. 2016;76(11-B(E)):No Pagination Specified.
37. Platten MJ, Newman E, Quayle E. Self-esteem and its relationship to mental health and quality of life in adults with cystic fibrosis. *J Clin Psychol Med Settings* 2013;20(3):392-9 doi: 10.1007/s10880-012-9346-8

- 1
- 2
- 3
- 4 38. Quittner AL, Sawicki GS, McMullen A, et al. Erratum to: Psychometric evaluation of the Cystic  
5 Fibrosis Questionnaire-Revised in a national, US sample. *Qual Life Res* 2012;21(7):1279-90. doi:  
6 10.1007/s11136-011-0091-5
- 7 39. Sole A, Oliveira C, Perez I, et al. Development and electronic validation of the revised Cystic  
8 Fibrosis Questionnaire (CFQ-R Teen/Adult): New tool for monitoring psychosocial health in CF. *J Cyst*  
9 *Fibros* 2018;17(5):672-9. doi: <https://doi.org/10.1016/j.jcf.2017.10.015>
- 10 40. Simon SL, Duncan CL, Horky SC, et al. Body satisfaction, nutritional adherence, and quality of  
11 life in youth with cystic fibrosis. *Pediatr Pulmonol* 2011;46(11):1085-92. [https://onlinelibrary-wiley-](https://onlinelibrary-wiley-com.ezproxy.lib.monash.edu.au/doi/full/10.1002/ppul.21477)  
12 [com.ezproxy.lib.monash.edu.au/doi/full/10.1002/ppul.21477](https://onlinelibrary-wiley-com.ezproxy.lib.monash.edu.au/doi/full/10.1002/ppul.21477) [accessed 25 Mar 2019] doi:  
13 10.1002/ppul.21477
- 14 41. Schmidt AM, Jacobsen U, Bregnballe V, et al. Exercise and quality of life in patients with  
15 cystic fibrosis: A 12-week intervention study. *Physiother* 2011;27(8):548-56. doi:  
16 10.3109/09593985.2010.545102
- 17 42. Abbott J, Hart A, Morton AM, et al. Can health-related quality of life predict survival in adults  
18 with cystic fibrosis? *Am J Respir Crit Care Med* 2009;179(1):54-8.
- 19 43. Forte GC, Barni GC, Perin C, et al. Relationship Between Clinical Variables and Health-Related  
20 Quality of Life in Young Adult Subjects With Cystic Fibrosis. *Respir Care* 2015;60(10):1459-68. doi:  
21 10.4187/respcare.03665
- 22 44. Kelemen L, Lee AL, Button BM, et al. Pain impacts on quality of life and interferes with  
23 treatment in adults with cystic fibrosis. *Physiother Res Int* 2012;17(3):132-41. doi: 10.1002/pri.524
- 24 45. Stofa M, Xanthos T, Ekmektzoglou K, et al. Quality of life in adults with cystic fibrosis: the  
25 Greek experience. *Pneumonol Alergol Pol* 2016;84(4):205-11 doi: 10.5603/PiAP.2016.0025
- 26 46. Tomaszek L, Debska G, Cepuch G, et al. Evaluation of quality of life predictors in adolescents  
27 and young adults with cystic fibrosis. *Heart and Lung* 2018;48(2):159-165 doi:  
28 <https://doi.org/10.1016/j.hrtlng.2018.08.003>
- 29 47. Uchmanowicz I, Jankowska-Polanska B, Rosinczuk J, et al. Health-related quality of life of  
30 patients suffering from cystic fibrosis. *Adv* 2015;24(1):147-52 doi: 10.17219/acem/38147
- 31 48. Yohannes AM, Dodd M, Morris J, et al. Reliability and validity of a single item measure of  
32 quality of life scale for adult patients with cystic fibrosis. *Health Qual Life Outcomes* 2011;9:105.
- 33 49. Yohannes AM, Willgoss TG, Fatoye FA, et al. Relationship between anxiety, depression, and  
34 quality of life in adult patients with cystic fibrosis. *Respir Care* 2012;57(4):550-6. doi:  
35 10.4187/respcare.01328
- 36 50. Aguiar KCA, Marson FAL, Gomez CCS, et al. Physical performance, quality of life and sexual  
37 satisfaction evaluation in adults with cystic fibrosis: An unexplored correlation. *Rev Port Pneumol*  
38 2017;23(4):179-92. doi: <http://dx.doi.org/10.1016/j.rppnen.2017.02.00>
- 39 51. Cohen MA, Ribeiro MA, Ribeiro AF, et al. Quality of life assessment in patients with cystic  
40 fibrosis by means of the Cystic Fibrosis Questionnaire. *J Bras Pneumol* 2011;37(2):184-92.
- 41 52. Eidt-Koch D, Mittendorf T, Greiner W. Cross-sectional validity of the EQ-5D-Y as a generic  
42 health outcome instrument in children and adolescents with cystic fibrosis in Germany. *BMC Pediatr*  
43 2009;9:55 doi: 10.1186/1471-2431-9-55
- 44 53. Shoff SM. Nutritional status and quality of life in children with CF aged 9 to 19 years. *Pediatr*  
45 *Pulmonol* 2014;38):174-6 doi: <http://dx.doi.org/10.1016/j.jcf.2013.01.00>
- 46 54. Tibosch MM, Sintnicolaas CJ, Peters JB, et al. How about your peers? Cystic fibrosis  
47 questionnaire data from healthy children and adolescents. *BMC Pediatr* 2011;11:86 doi:  
48 55. Tluczek A, Becker T, Laxova A, et al. Relationships among health-related quality of life,  
49 pulmonary health, and newborn screening for cystic fibrosis. *Chest* 2011;140(1):170-7. doi:  
50 10.1378/chest.10-1504
- 51 56. de Souza Serio dos Santos DM, Deon KC, Bullinger M, et al. Validity of the DISABKIDS® -  
52 Cystic Fibrosis Module for Brazilian children and adolescents. *Rev Lat Am Enfermagem*  
53 2014;22(5):819-25 doi: 10.1590/0104-1169.3450.2485
- 54
- 55
- 56
- 57
- 58
- 59
- 60

57. Goss CH, Edwards TC, Ramsey BW, et al. Patient-reported respiratory symptoms in cystic fibrosis. *J Cyst Fibros* 2009;8(4):245-52 doi: doi:10.1016/j.jcf.2009.04.003
58. Ward N, Stiller K, Rowe H, et al. The psychometric properties of the Leicester Cough Questionnaire and Respiratory Symptoms in CF tool in cystic fibrosis: A preliminary study. *J Cyst Fibros* 2017;16(3):425-32 doi: <http://dx.doi.org/10.1016/j.jcf.2016.11.011>
59. Henry B, Aussage P, Grosskopf C, et al. Measuring Quality of Life in Children with Cystic Fibrosis: The Cystic Fibrosis Questionnaire (CFQ). *Qual Life Res* 1997;6(7/8):657.
60. Wenninger K, Aussage P, Wahn U, et al. The Revised German Cystic Fibrosis Questionnaire" Validation of a Disease-specific Health-related Quality of Life Instrument. *Qual Life Res* 2003;12(1):77-85
61. Gancz DW, Cunha MT, Leone C, et al. Quality of life amongst adolescents and young adults with cystic fibrosis: correlations with clinical outcomes. *Clinics* 2018;73:e427.
62. Alpern AN, Brumback LC, Ratjen F, et al. Initial evaluation of the Parent Cystic Fibrosis Questionnaire--Revised (CFQ-R) in infants and young children. *J Cyst Fibros* 2015;14(3):403-11. doi: <http://dx.doi.org/10.1016/j.jcf.2014.11.002>
63. Acaster S, Pinder B, Mukuria C, et al. Mapping the EQ-5D index from the cystic fibrosis questionnaire-revised using multiple modelling approaches. *Health Qual Life Outcomes* 2015;13:33 doi: 10.1186/s12955-015-0224-6
64. Cronly J, Duff A, Riekert K, et al. Positive mental health and wellbeing in adults with cystic fibrosis: A cross sectional study. *J Psychosom Res* 2019;116:125-30. doi: <https://doi.org/10.1016/j.jpsychores.2018.11.016>
65. Hochwalder J, Bergsten Brucefors A, Hjelte L. Psychometric evaluation of the Swedish translation of the revised Cystic Fibrosis Questionnaire in adults. *Ups J Med Sci* 2017;122(1):61-6. doi: <http://dx.doi.org/10.1080/03009734.2016.1225871>
66. Sawicki GS, Sellers DE, Robinson WM. Associations between illness perceptions and health-related quality of life in adults with cystic fibrosis. *J Psychosom Res* 2011;70(2):161-7 doi:10.1016/j.jpsychores.2010.06.005
67. Borawska-Kowalczyk U, Sands D. Determinants of health-related quality of life in polish patients with CF - adolescents' and parents' perspectives. *Med Wieku Rozwoj* 2015;19(1):127-36.
68. Sawicki GS, Rasouliyan L, McMullen AH, et al. Longitudinal assessment of health-related quality of life in an observational cohort of patients with cystic fibrosis. *Pediatr Pulmonol* 2011;46(1):36-44 doi: 10.1002/ppul.21325
69. Sole A, Perez I, Vazquez I, et al. Patient-reported symptoms and functioning as indicators of mortality in advanced cystic fibrosis: A new tool for referral and selection for lung transplantation. *J Heart Lung Transplant* 2016;35(6):789-94 doi: <http://dx.doi.org/10.1016/j.healun.2016.01.1233>
70. Yuksel H, Yilmaz O, Dogru D, et al. Reliability and validity of the Cystic Fibrosis Questionnaire-Revised for children and parents in Turkey: cross-sectional study. *Qual Life Res* 2013;22(2):409-14. doi: 10.1007/s11136-012-0152-4
71. Debska G, Cepuch G, Mazurek H. Quality of life in patients with cystic fibrosis depending on the severity of the disease and method of its treatment. *Postepy Hig Med Dosw (Online)* 2014;68:498-502.
72. Del Corral T, Percegonia J, Lopez N, et al. Validity of a Spanish Version of the Leicester Cough Questionnaire in Children With Cystic Fibrosis. *Arch Bronconeumol* 2016;52(2):63-9.
73. Ihle F, Zimmermann G, Meis T, et al. Determinants of quality of life after lung transplantation. *Open Transplant J* 2015;8(1).
74. Ricotti S, Martinelli V, Caspani P, et al. Changes in quality of life and functional capacity after lung transplantation: A single-center experience. *Monaldi Arch Chest Dis* 2017;87(3):123-9. doi: 10.4081/monaldi.2017.831
75. Xie DX, Wu J, Kelly K, et al. Evaluating the sinus and Nasal Quality of Life Survey in the pediatric cystic fibrosis patient population. *Int J Pediatr Otorhinolaryngol* 2017;102:133-7. doi: <https://doi.org/10.1016/j.ijporl.2017.09.014>

- 1  
2  
3 76. Chan DK, McNamara S, Park JS, et al. Sinonasal Quality of Life in Children With Cystic  
4 Fibrosis. *JAMA Otolaryngol Head Neck Surg* 2016;142(8):743-9. doi: 10.1001/jamaoto.2016.0979
- 5 77. Kang SH, Meotti CD, Bombardelli K, et al. Sinonasal characteristics and quality of life by  
6 SNOT-22 in adult patients with cystic fibrosis. *Eur Arch Otorhinolaryngol* 2017;274(4):1873-82 doi:  
7 0.1007/s00405-016-4426-2
- 8 78. Powell CVE, McNamara P, Solis A, et al. A parent completed questionnaire to describe the  
9 patterns of wheezing and other respiratory symptoms in infants and preschool children. *Arch Dis*  
10 *Child*. 2002;87(5):376-9. doi: <http://dx.doi.org/10.1136/adc.87.5.376>
- 11 79. Birring SS, Prudon B, Carr AJ, et al. Development of a symptom specific health status  
12 measure for patients with chronic cough: Leicester Cough Questionnaire (LCQ). *Thorax*.  
13 2003;58(4):339-43. doi: <http://dx.doi.org/10.1136/thorax.58.4.339>
- 14 80. Goldbeck L, Besier T, Hinz A, et al. Prevalence of symptoms of anxiety and depression in  
15 German patients with cystic fibrosis. *Chest* 2010;138(4):929-36.
- 16 81. Olveira C, Sole A, Giron R, et al. Depression and anxiety symptoms in Spanish adult patients  
17 with cystic fibrosis: Associations with health-related quality of life. *Gen Hosp Psychiatry* 2016;40:39-  
18 46.
- 19 82. Quon BS, Bentham WD, Unutzer J, et al. Prevalence of symptoms of depression and anxiety  
20 in adults with cystic fibrosis based on the PHQ-9 and GAD-7 screening questionnaires.  
21 *Psychosomatics* 2015;56(4):345-53.
- 22 83. Angelis A, Kanavos P, Lopez-Bastida J, et al. Social and economic costs and health-related  
23 quality of life in non-institutionalised patients with cystic fibrosis in the United Kingdom. *BMC Health*  
24 *Serv Res* 2015;15:428 doi: 10.1186/s12913-015-1061-3
- 25 84. Bradley JM, Blume SW, Balp MM, et al. Quality of life and healthcare utilisation in cystic  
26 fibrosis: a multicentre study. *Eur Respir J* 2013;41(3):571-7 doi: 10.1183/09031936.00224911
- 27 85. Chevreur K, Michel M, Brigham K, et al. Social/economic costs and health-related quality of  
28 life in patients with cystic fibrosis in Europe. *Eur J Health Econ* 2016;17:7-18 doi: 10.1007/s10198-  
29 016-0781-6
- 30 86. Vandeleur M, Walter LM, Armstrong DS, et al. Quality of life and mood in children with cystic  
31 fibrosis: Associations with sleep quality. *J Cyst Fibros* 2018;17(6):811-20 doi:  
32 <https://doi.org/10.1016/j.jcf.2017.11.021>
- 33 87. Uchmanowicz I, Jankowska-Polańska B, Wleklík M, et al. Health-related quality of life of  
34 patients with cystic fibrosis assessed by the SF-36 questionnaire. *Pneumonol Alergol Pol*  
35 2014;82(1):10-7
- 36 88. Abbott J. Health-related quality of life measurement in cystic fibrosis: advances and  
37 limitations. *Chron* 2009;6(1):31-41
- 38 89. Varni WJ, Seid AM, Rode AC. The PedsQL™: Measurement Model for the Pediatric Quality of  
39 Life Inventory. *Medical Care* 1999;37(2):126-39.
- 40 90. Use of Patient-Reported Outcomes in Registries. In: Glicklich RE, Dryer NA, Leavy MB, eds.  
41 Registries for Evaluating Patient Outcomes: A User's Guide 2. Rockville, MD: Agency for Healthcare  
42 Research and Quality 2014
- 43 91. Backstrom-Eriksson L, Bergsten-Brucefors A, Hjelte L, et al. Associations between genetics,  
44 medical status, physical exercise and psychological well-being in adults with cystic fibrosis. *BMJ Open*  
45 *Respir Res* 2016;3:e000141 <https://bmjopenrespres.bmj.com/content/bmjresp/3/1/e000141.full.pdf>  
46 [accessed 15 Mar 2019] doi:10.1136/bmjresp-2016-000141
- 47 92. Australian Institute of Health and Welfare. Australia's Health 2018. Canberra; Australian  
48 Institute of Health and Welfare; 2018
- 49 93. Wilcox N, McNeil JJ. Clinical quality registries have the potential to drive improvements in  
50 the appropriateness of care. *Med J Aust* 2016;205(S10):S21-S6 doi:  
51 <https://doi.org/10.5694/mja15.00921>
- 52 94. Gee L, Abbott J, Conway SP, et al. Development of a disease specific health related quality of  
53 life measure for adults and adolescents with cystic fibrosis. *Thorax* 2000;55(11):946-54.
- 54  
55  
56  
57  
58  
59  
60

1  
2  
3 95. Henry B, Aussage P, Grosskopf C, et al. Development of the Cystic Fibrosis Questionnaire  
4 (CFQ) for assessing quality of life in pediatric and adult patients. *Qual Life Res.* 2003;12(1):63-76. doi:  
5 <https://doi.org/10.1023/A:1022037320039>  
6

7 96. Cavanaugh K, Read L, Dreyfus J, et al. Association of poor sleep with behavior and quality of  
8 life in children and adolescents with cystic fibrosis. *Sleep Biol Rhythms* 2016;14(2):199-204 doi:  
9 [10.1007/s41105-015-0044-4](https://doi.org/10.1007/s41105-015-0044-4)  
10  
11  
12  
13  
14  
15  
16  
17  
18  
19  
20  
21  
22  
23  
24  
25  
26  
27  
28  
29  
30  
31  
32  
33  
34  
35  
36  
37  
38  
39  
40  
41  
42  
43  
44  
45  
46  
47  
48  
49  
50  
51  
52  
53  
54  
55  
56  
57  
58  
59  
60

For peer review only

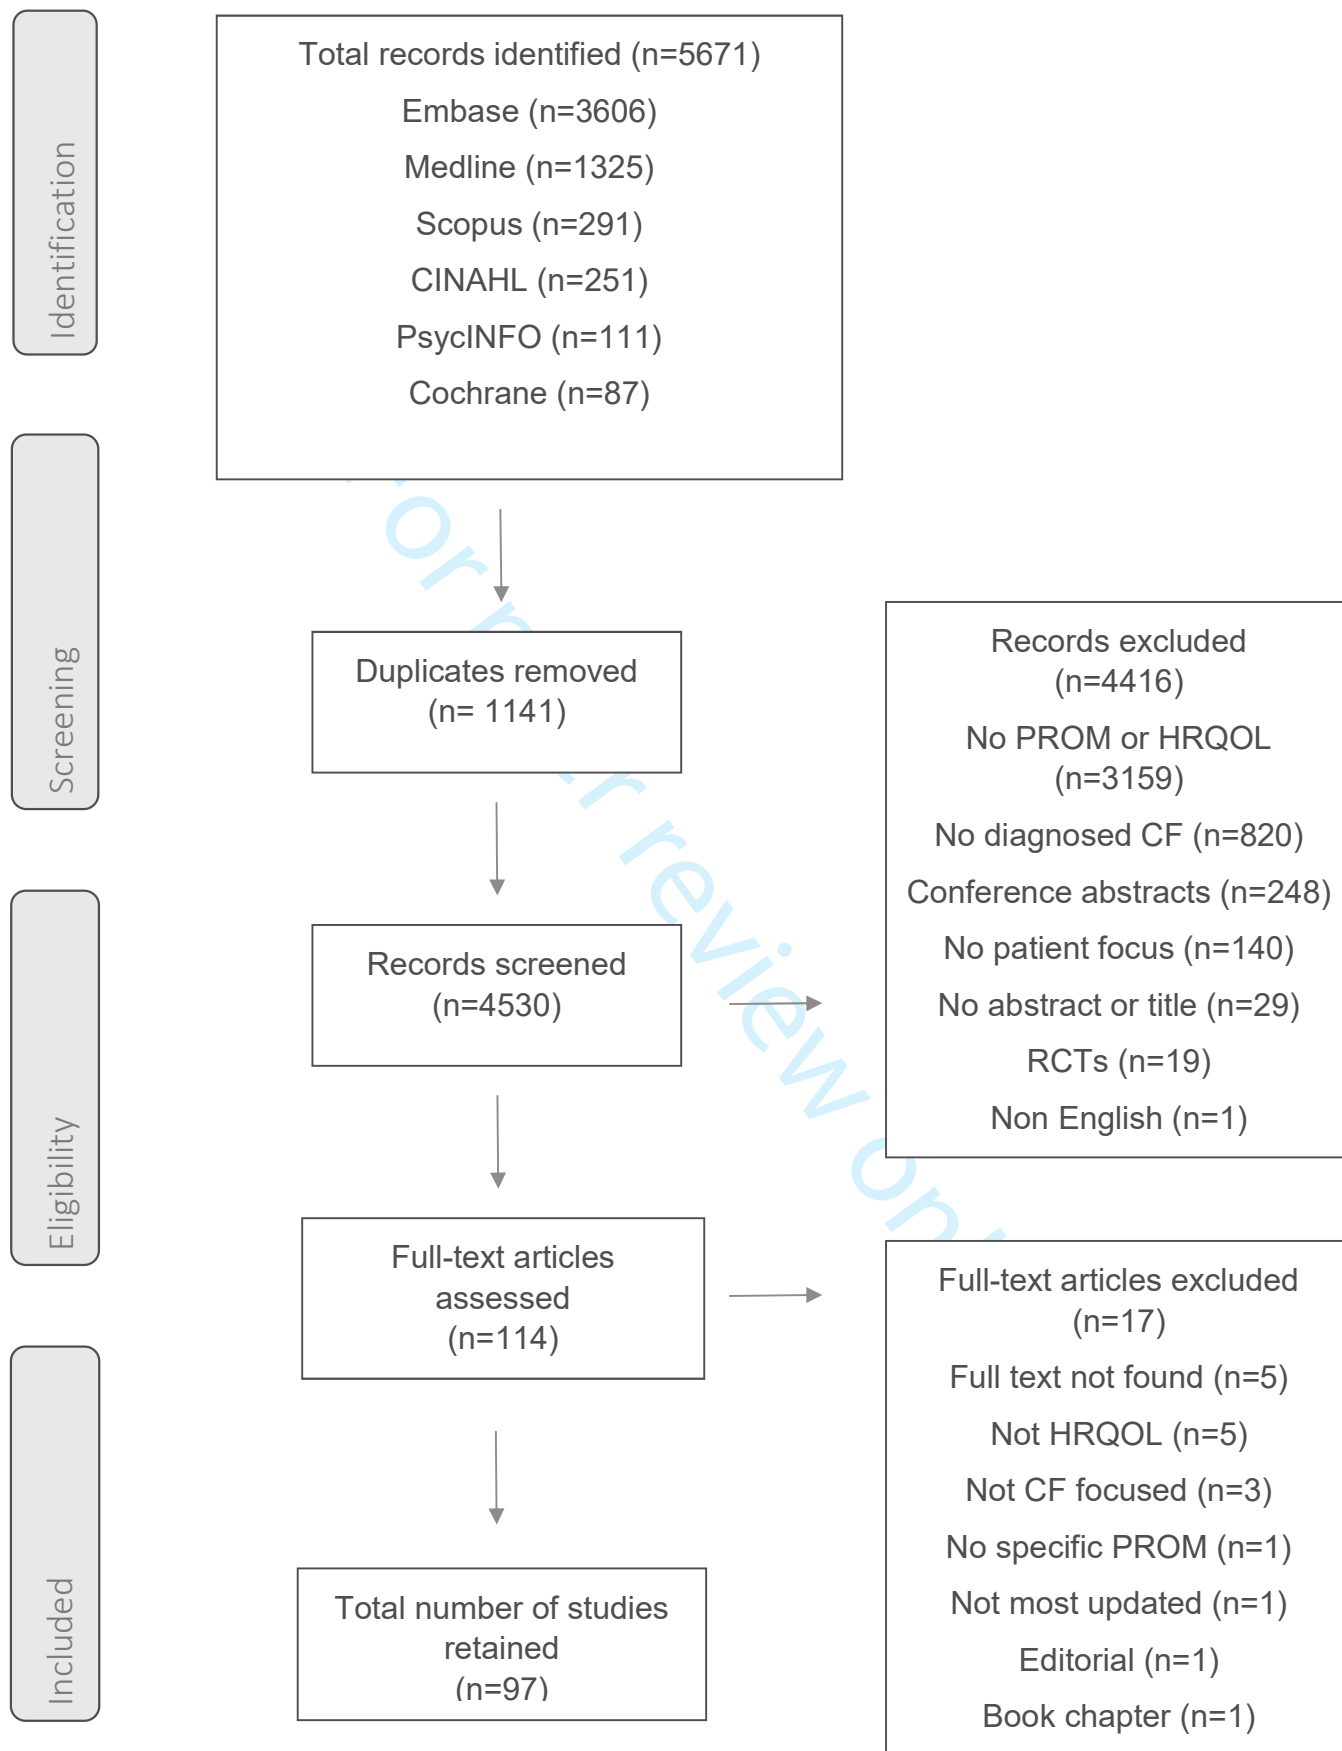

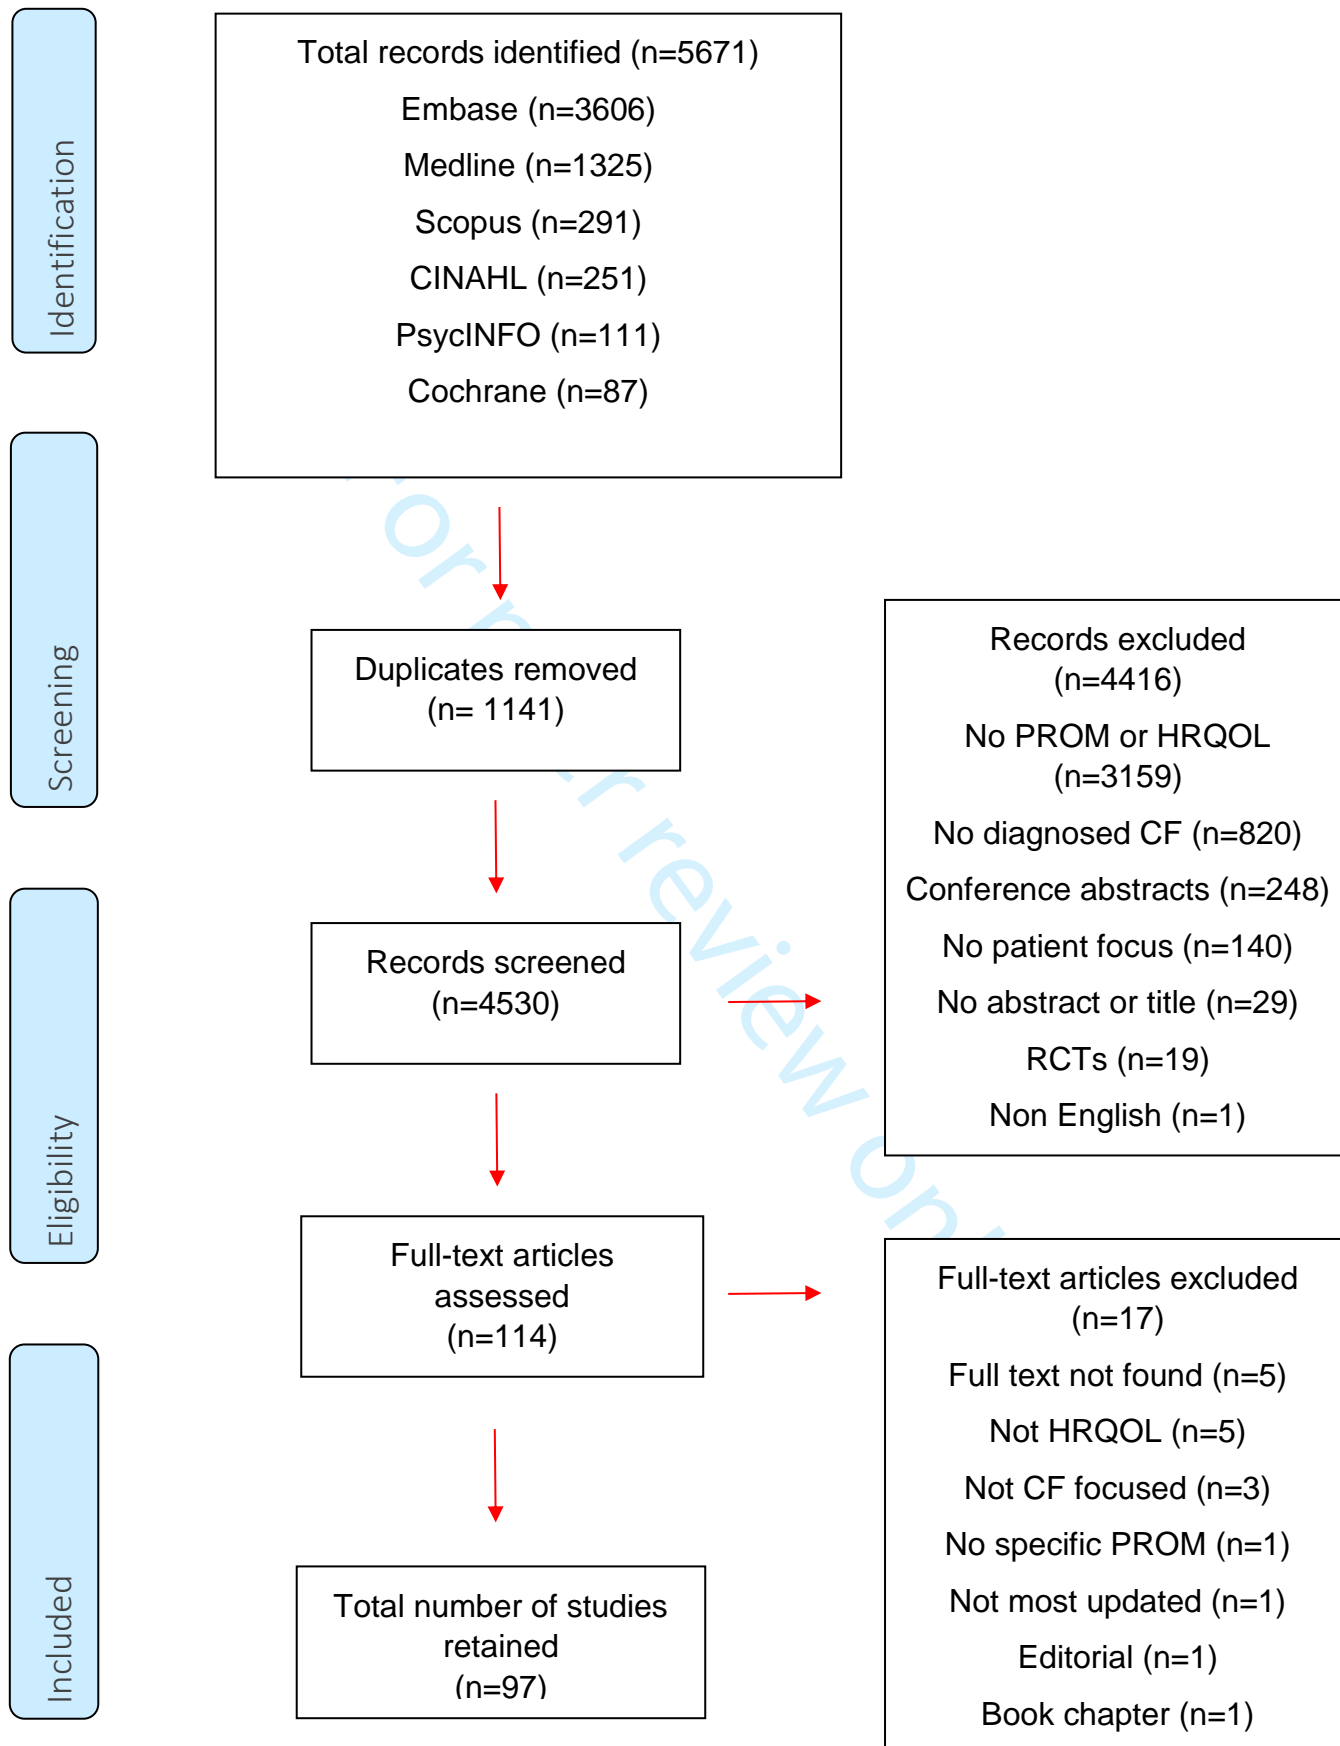

## Supplementary File 1: Complete search strategy

|                 |                                                                                                                            |
|-----------------|----------------------------------------------------------------------------------------------------------------------------|
| <b>Database</b> | <b>OVID MEDLINE</b>                                                                                                        |
| <b>Strategy</b> | <b>#1 OR #2 AND #3</b><br>Limit English language and humans and last 10 years                                              |
| #1              | Patient Reported Outcome Measures/exp OR "Surveys and Questionnaires/exp OR Self Report/exp or Perception/exp OR scale.mp  |
| #2              | "Quality of Life"/exp OR QOL.mp OR "health related quality of life". mp                                                    |
| #3              | Cystic Fibrosis/exp                                                                                                        |
| <b>Database</b> | <b>PsycINFO</b>                                                                                                            |
| <b>Strategy</b> | <b>#1 OR #2 AND #3</b><br>Limit English language and humans and last 10 years                                              |
| #1              | Patient reported outcome.mp OR Self Report/exp OR Client Attitudes/exp OR Questionnaires/exp OR Perception/exp OR scale.mp |
| #2              | "Quality of Life"/exp OR QOL.mp                                                                                            |
| #3              | Cystic Fibrosis/ exp                                                                                                       |
| <b>Database</b> | <b>Scopus</b>                                                                                                              |
| <b>Strategy</b> | <b>#1 OR #2 AND #3</b><br>Limit English language and Publication Year 2009 – 2019 and Final Publication                    |
| #1              | patient AND reported AND outcome* OR self-report* OR questionnaire OR scale OR perception                                  |
| #2              | quality AND of AND life                                                                                                    |
| #3              | cystic AND fibrosis                                                                                                        |
| <b>Database</b> | <b>Embase</b>                                                                                                              |
| <b>Strategy</b> | <b>#1 OR #2 AND #3</b><br>Limit English language and humans and last 10 years                                              |
| #1              | Patient-reported outcome/exp OR questionnaire/exp OR self report/exp or perception/exp OR scale.mp                         |
| #2              | Quality of life/exp OR QOL.mp                                                                                              |
| #3              | Cystic Fibrosis/ exp                                                                                                       |
| <b>Database</b> | <b>Cochrane</b>                                                                                                            |
| <b>Strategy</b> | <b>#1 OR #2 AND #3</b><br>Limit English language and humans and last 10 years                                              |
| #1              | Patient Reported Outcome Measures/exp OR Self Report/exp OR Survey and Questionnaires/exp                                  |



|                 |                                                                                   |                                                                                                  |
|-----------------|-----------------------------------------------------------------------------------|--------------------------------------------------------------------------------------------------|
|                 | #2                                                                                | Quality of Life/exp                                                                              |
|                 | #3                                                                                | Cystic Fibrosis/ exp                                                                             |
| <b>Database</b> | <b>CINAHL</b>                                                                     |                                                                                                  |
| <b>Strategy</b> | <b>#1 OR #2 AND #3</b><br>Limit English language and Publication Year 2009 - 2019 |                                                                                                  |
|                 | #1                                                                                | "Patient-reported Outcome Measures" OR "Self Report+" OR "Patient Attitudes" OR "Questionnaires" |
|                 | #2                                                                                | "Quality of Life+"                                                                               |
|                 | #3                                                                                | "Cystic Fibrosis"                                                                                |

1  
2  
3  
4  
5  
6  
7  
8  
9  
10  
11  
12  
13  
14  
15  
16  
17  
18  
19  
20  
21  
22  
23  
24  
25  
26  
27  
28  
29  
30  
31  
32  
33  
34  
35  
36  
37  
38  
39  
40  
41  
42  
43  
44  
45  
46  
47  
48  
49  
50  
51  
52  
53  
54  
55  
56  
57  
58  
59  
60

For peer review only

Supplementary File 2: Results of critical appraisal using COSMIN Risk of Bias Checklist

|                      | 1. PROM development | 2. Content validity | 3. Structural validity | 4. Internal consistency | 5. Cross cultural validity | 6. Reliability | 7. Measurement Error | 8. Criterion validity | 9. Hypothesis testing for construct validity | 10. Responsiveness |
|----------------------|---------------------|---------------------|------------------------|-------------------------|----------------------------|----------------|----------------------|-----------------------|----------------------------------------------|--------------------|
| <b>CFQOL</b>         |                     |                     |                        |                         |                            |                |                      |                       |                                              |                    |
| <b>CFQOL English</b> |                     |                     |                        |                         |                            |                |                      |                       |                                              |                    |
| Abbott 2009          |                     |                     |                        | Very good               |                            | Adequate       |                      |                       | Adequate                                     |                    |
| Abbott 2013          | -                   | -                   | -                      | Very good               | -                          | Adequate       | -                    | -                     | Adequate                                     | Doubtful           |
| Abbott 2015          | -                   | -                   | -                      | Very good               | -                          | Adequate       | -                    | -                     | Adequate                                     | Doubtful           |
| Salek 2012           | -                   | Doubtful            | -                      | Doubtful                | -                          | Adequate       | -                    | -                     | Adequate                                     | -                  |
| Yohannes 2011        | -                   | -                   | -                      | -                       | -                          | Very good      | -                    | -                     | -                                            | -                  |
| Yohannes 2012        | -                   | -                   | -                      | -                       | -                          | -              | -                    | -                     | Very good                                    | -                  |
| Young 2011           | -                   | -                   | -                      | -                       | -                          | -              | -                    | -                     | Adequate                                     | -                  |
| <b>CFQoL Greek</b>   |                     |                     |                        |                         |                            |                |                      |                       |                                              |                    |
| Stofa 2016           | -                   | -                   | -                      | Doubtful                | -                          | -              | -                    | -                     | -                                            | -                  |
| <b>CFQ-R</b>         |                     |                     |                        |                         |                            |                |                      |                       |                                              |                    |
| <b>CFQ-R English</b> |                     |                     |                        |                         |                            |                |                      |                       |                                              |                    |
| Alpern 2015          | -                   | -                   | -                      | Very good               | -                          | -              | -                    | -                     | Doubtful                                     | -                  |
| Driscoll 2015        | -                   | -                   | -                      | Very good               | -                          | -              | -                    | -                     | Adequate                                     | -                  |
| Hegarty 2009         | -                   | -                   | -                      | -                       | -                          | -              | -                    | -                     | Very good                                    | -                  |
| Kilcoyne 2016        | -                   | -                   | -                      | -                       | -                          | -              | -                    | -                     | Doubtful                                     | -                  |
| Mc Hugh 2016         | -                   | -                   | -                      | Very good               | -                          | -              | -                    | -                     | Very good                                    | -                  |
| Modi 2010            | -                   | -                   | -                      | -                       | -                          | -              | -                    | -                     | -                                            | Adequate           |
| Oliver 2014          | -                   | -                   | -                      | Very good               | -                          | -              | -                    | -                     | Very good                                    | -                  |

|                         | 1. PROM development | 2. Content validity | 3. Structural validity | 4. Internal consistency | 5. Cross cultural validity | 6. Reliability | 7. Measurement Error | 8. Criterion validity | 9. Hypothesis testing for construct validity | 10. Responsiveness |
|-------------------------|---------------------|---------------------|------------------------|-------------------------|----------------------------|----------------|----------------------|-----------------------|----------------------------------------------|--------------------|
| Quittner 2012           | -                   | -                   | -                      | Very good               | -                          | -              | -                    | -                     | Doubtful                                     | -                  |
| Sawicki 2011            | -                   | -                   | -                      | -                       | -                          | -              | -                    | -                     | Adequate                                     | -                  |
| Simon 2011              | -                   | -                   | -                      | Very good               | -                          | -              | -                    | -                     | Adequate                                     | -                  |
| Sole 2016               | -                   | -                   | -                      | -                       | -                          | Very good      | -                    | -                     | -                                            | -                  |
| <b>CFQ-R German</b>     |                     |                     |                        |                         |                            |                |                      |                       |                                              |                    |
| Herbestreit 2014        | -                   | -                   | -                      | -                       | -                          | -              | -                    | -                     | Adequate                                     | Adequate           |
| Schmidt 2009            | -                   | -                   | Adequate               | Very good               | -                          | Adequate       | -                    | -                     | Doubtful                                     | -                  |
| Sole 2018               | -                   | -                   | -                      | -                       | -                          | Very good      | -                    | -                     | -                                            | -                  |
| <b>CFQ-R Polish</b>     |                     |                     |                        |                         |                            |                |                      |                       |                                              |                    |
| Borawska Kowalczyk 2015 | -                   | -                   | -                      | Very good               | -                          | -              | -                    | -                     | Adequate                                     | -                  |
| Borawska Kowalczyk 2016 | -                   | -                   | -                      | Very good               | Inadequate                 | -              | -                    | -                     | -                                            | -                  |
| <b>CFQ-R Dutch</b>      |                     |                     |                        |                         |                            |                |                      |                       |                                              |                    |
| Havermans 2009          | -                   | -                   | -                      | Very good               | -                          | -              | -                    | -                     | Adequate                                     | -                  |
| Horck 2017              | -                   | -                   | -                      | -                       | -                          | -              | -                    | -                     | Adequate                                     | -                  |
| Tepper 2012             | -                   | -                   | -                      | -                       | -                          | -              | -                    | -                     | Adequate                                     | -                  |
| <b>CFQ-R Persian</b>    |                     |                     |                        |                         |                            |                |                      |                       |                                              |                    |
| Kianifar 2013           | -                   | -                   | -                      | -                       | -                          | Doubtful       | -                    | -                     | Adequate                                     | -                  |
| <b>CFQ-R Hindi</b>      |                     |                     |                        |                         |                            |                |                      |                       |                                              |                    |
| Kir 2015                | -                   | -                   | Inadequate             | Very good               | -                          | -              | -                    | -                     | Doubtful                                     | -                  |
| <b>CFQ-R Dutch</b>      |                     |                     |                        |                         |                            |                |                      |                       |                                              |                    |

1  
2  
3  
4  
5  
6  
7  
8  
9  
10  
11  
12  
13  
14  
15  
16  
17  
18  
19  
20  
21  
22  
23  
24  
25  
26  
27  
28  
29  
30  
31  
32  
33  
34  
35  
36  
37  
38  
39  
40  
41  
42  
43  
44  
45  
46

|                          | 1. PROM development | 2. Content validity | 3. Structural validity | 4. Internal consistency | 5. Cross cultural validity | 6. Reliability | 7. Measurement Error | 8. Criterion validity | 9. Hypothesis testing for construct validity | 10. Responsiveness |
|--------------------------|---------------------|---------------------|------------------------|-------------------------|----------------------------|----------------|----------------------|-----------------------|----------------------------------------------|--------------------|
| Schmidt 2011             | -                   | -                   | -                      | Very good               | -                          | -              | -                    | -                     | -                                            | Adequate           |
| <b>CFQ-R Hungarian</b>   |                     |                     |                        |                         |                            |                |                      |                       |                                              |                    |
| Toth 2016                | -                   | -                   | -                      | -                       | -                          | -              | -                    | -                     | Doubtful                                     | -                  |
| <b>CFQ-R Swedish</b>     |                     |                     |                        |                         |                            |                |                      |                       |                                              |                    |
| Backstrom-Eriksson 2016  | -                   | -                   | -                      | -                       | -                          | -              | -                    | -                     | Doubtful                                     | -                  |
| Hochwalder 2017          | -                   | -                   | -                      | Very good               | -                          | Adequate       | -                    | -                     | Doubtful                                     | -                  |
| <b>CFQ-R Turkish</b>     |                     |                     |                        |                         |                            |                |                      |                       |                                              |                    |
| Yuksel 2013              | -                   | -                   | -                      | Very good               | -                          | -              | -                    | -                     | Doubtful                                     | -                  |
| <b>CFQ</b>               |                     |                     |                        |                         |                            |                |                      |                       |                                              |                    |
| <b>CFQ English</b>       |                     |                     |                        |                         |                            |                |                      |                       |                                              |                    |
| Shoff 2014               | -                   | -                   | -                      | -                       | -                          | -              | -                    | -                     | -                                            | Adequate           |
| Tluczek 2011             | -                   | -                   | -                      | Very good               | -                          | -              | -                    | -                     | -                                            | Doubtful           |
| Tluczek 2013             | -                   | -                   | -                      | Very good               | -                          | -              | -                    | -                     | Doubtful                                     | -                  |
| <b>DISABKIDS-CFM</b>     |                     |                     |                        |                         |                            |                |                      |                       |                                              |                    |
| De souza dos Santos 2013 | -                   | Doubtful            | -                      | Very good               | -                          | -              | -                    | -                     | Very good                                    | -                  |
| De souza dos Santos 2014 | -                   | -                   | -                      | Very good               | -                          | Very good      | -                    | -                     | Adequate                                     | -                  |
| <b>CF Symptom Diary</b>  |                     |                     |                        |                         |                            |                |                      |                       |                                              |                    |
| Goss 2009                | Doubtful            | -                   | -                      | -                       | -                          | -              | -                    | -                     | -                                            | -                  |
| <b>CFRSD</b>             |                     |                     |                        |                         |                            |                |                      |                       |                                              |                    |
| Edwards 2018             | Adequate            | Adequate            | -                      | -                       | -                          | Very good      | -                    | -                     | Adequate                                     | -                  |

|                      | 1. PROM development | 2. Content validity | 3. Structural validity | 4. Internal consistency | 5. Cross cultural validity | 6. Reliability | 7. Measurement Error | 8. Criterion validity | 9. Hypothesis testing for construct validity | 10. Responsiveness |
|----------------------|---------------------|---------------------|------------------------|-------------------------|----------------------------|----------------|----------------------|-----------------------|----------------------------------------------|--------------------|
| <b>CFSPS</b>         |                     |                     |                        |                         |                            |                |                      |                       |                                              |                    |
| Norrish 2015         | Inadequate          | -                   | Adequate               | Doubtful                | -                          | -              | -                    | -                     | Doubtful                                     | -                  |
| <b>Res-CF</b>        |                     |                     |                        |                         |                            |                |                      |                       |                                              |                    |
| Ward 2016            | -                   | -                   | -                      | Very good               | -                          | Very good      | -                    | -                     | -                                            | Adequate           |
| <b>LCQ</b>           |                     |                     |                        |                         |                            |                |                      |                       |                                              |                    |
| <b>LCQ English</b>   |                     |                     |                        |                         |                            |                |                      |                       |                                              |                    |
| Ward 2016            | -                   | -                   | -                      | Very good               | -                          | Very good      | -                    | -                     | -                                            | Adequate           |
| <b>LCQ Spanish</b>   |                     |                     |                        |                         |                            |                |                      |                       |                                              |                    |
| Del Corral           | -                   | -                   | -                      | Very good               | -                          | Very good      | Adequate             | -                     | Adequate                                     | -                  |
| <b>LRSS</b>          |                     |                     |                        |                         |                            |                |                      |                       |                                              |                    |
| Trinick 2012         | -                   | -                   | -                      | Very good               | -                          | -              | -                    | -                     | Doubtful                                     | -                  |
| <b>SN-5</b>          |                     |                     |                        |                         |                            |                |                      |                       |                                              |                    |
| Chan 2016            | -                   | -                   | -                      | -                       | -                          | -              | -                    | -                     | Doubtful                                     | -                  |
| <b>HADS</b>          |                     |                     |                        |                         |                            |                |                      |                       |                                              |                    |
| Goldbeck 2010        | -                   | -                   | -                      | Very good               | -                          | -              | -                    | -                     | -                                            | Very good          |
| Yohannes 2012        | -                   | -                   | -                      | -                       | -                          | -              | -                    | -                     | Adequate                                     | -                  |
| <b>EQ-5D</b>         |                     |                     |                        |                         |                            |                |                      |                       |                                              |                    |
| <b>EQ-5D English</b> |                     |                     |                        |                         |                            |                |                      |                       |                                              |                    |
| Bradley 2013         | -                   | -                   | -                      | -                       | -                          | -              | -                    | -                     | Very good                                    | -                  |
| Solem 2016           | -                   | -                   | -                      | -                       | -                          | -              | -                    | -                     | -                                            | Adequate           |
| <b>EQ-5D German</b>  |                     |                     |                        |                         |                            |                |                      |                       |                                              |                    |
| Eidt Koch 2009       | -                   | -                   | -                      | -                       | -                          | -              | -                    | -                     | Adequate                                     | -                  |

1  
2  
3  
4  
5  
6  
7  
8  
9  
10  
11  
12  
13  
14  
15  
16  
17  
18  
19  
20  
21  
22  
23  
24  
25  
26  
27  
28  
29  
30  
31  
32  
33  
34  
35  
36  
37  
38  
39  
40  
41  
42  
43  
44  
45  
46

|                  | 1. PROM development | 2. Content validity | 3. Structural validity | 4. Internal consistency | 5. Cross cultural validity | 6. Reliability | 7. Measurement Error | 8. Criterion validity | 9. Hypothesis testing for construct validity | 10. Responsiveness |
|------------------|---------------------|---------------------|------------------------|-------------------------|----------------------------|----------------|----------------------|-----------------------|----------------------------------------------|--------------------|
| PedsQL           |                     |                     |                        |                         |                            |                |                      |                       |                                              |                    |
| Modi 2009        | -                   | -                   | -                      | -                       | -                          | -              | -                    | -                     | -                                            | Adequate           |
| SF-36            |                     |                     |                        |                         |                            |                |                      |                       |                                              |                    |
| Abbott 2009      | -                   | -                   | -                      | Very good               | -                          | -              | -                    | -                     | Doubtful                                     | -                  |
| Ricotti 2017     | -                   | -                   | -                      | Doubtful                | -                          | -              | -                    | -                     | -                                            | -                  |
| Uchmanowicz 2014 | -                   | -                   | -                      | -                       | -                          | -              | -                    | -                     | Adequate                                     | -                  |
| CORE-OM          |                     |                     |                        |                         |                            |                |                      |                       |                                              |                    |
| Platten 2013     | -                   | -                   | -                      | Very good               | -                          | -              | -                    | -                     | Very good                                    | -                  |
| UKSIP            |                     |                     |                        |                         |                            |                |                      |                       |                                              |                    |
| Salek 2012       | -                   | Doubtful            | -                      | Doubtful                | -                          | Adequate       | -                    | -                     | Adequate                                     | -                  |

## Supplementary File 3: Data Extraction Table

| Author                     | Type of study      | Setting           | Patient group | Age mean (SD) | Population size, N | Instruments  | Type of PROM | Why PROM used?                                    | Method of administration | Timepoints                           |
|----------------------------|--------------------|-------------------|---------------|---------------|--------------------|--------------|--------------|---------------------------------------------------|--------------------------|--------------------------------------|
| Abbott et al, 2009, UK     | Prospective cohort | Inpatient         | All Age       | 25.1 (7.1)    | 223                | CFQOL        | Specific     | HRQOL as a predictor                              | Not stated               | At entry                             |
|                            |                    |                   |               |               |                    | SF-36        | Generic      |                                                   |                          |                                      |
| Abbott et al, 2013, UK     | Longitudinal       | Outpatient Clinic | All Age       | Not stated    | 234                | CFQOL        | Specific     | Association between physical factors and HRQOL    | Postal                   | 7 assessments 2 yearly over 12 years |
| Abbott et al, 2015, UK     | Longitudinal       | Outpatient Clinic | All Age       | 28.5 (8.2)    | 234                | CFQOL        | Specific     | Association between demographic factors and HRQOL | Postal                   | 7 assessments 2 yearly over 12 years |
| Acaster et al, 2015, UK    | Cross-sectional    | National database | Adult         | 28.7 (8.88)   | 401                | CFQ-R        | Specific     | Used to validate another PROM                     | Online                   | At entry                             |
|                            |                    |                   |               |               |                    | EQ-5D        | Generic      | Economic evaluation                               |                          |                                      |
| Aguiar et al, 2017, Brazil | Cross-sectional    | Outpatient Clinic | Adult         | Not stated    | 52                 | CFQ          | Specific     | Correlate to another PROM                         | Software program         | At entry                             |
| Alpern et al, 2015, US     | Validation         | RCT data          | Child         | 2.28 (1.45)   | 314                | CFQ-R Parent | Specific     | Validate PROM in new age group                    | Not stated               | 5 assessments 12 weeks apart         |



1  
2  
3  
4  
5  
6  
7  
8  
9  
10  
11  
12  
13  
14  
15  
16  
17  
18  
19  
20  
21  
22  
23  
24  
25  
26  
27  
28  
29  
30  
31  
32  
33  
34  
35  
36  
37  
38  
39  
40  
41  
42  
43  
44  
45  
46

| Author                                 | Type of study   | Setting           | Patient group | Age mean (SD) | Population size, N | Instruments | Type of PROM | Why PROM used?                                 | Method of administration | Timepoints                   |
|----------------------------------------|-----------------|-------------------|---------------|---------------|--------------------|-------------|--------------|------------------------------------------------|--------------------------|------------------------------|
| Angelis et al, 2015, UK                | Cross-sectional | National database | All Age       | 18.3 (15.1)   | 74                 | EQ-5D       | Generic      | HRQOL in a population                          | Postal and online        | At entry                     |
| Ashish et al, 2012, UK                 | Cross-sectional | Outpatient Clinic | Adult         | Not stated    | 157                | CFQ-R       | Specific     | Association between physical factors and HRQOL | Paper                    | At entry                     |
| Backstrom-Eriksson et al, 2016, Sweden | Cross-sectional | Outpatient Clinic | Adult         | 32.2          | 68                 | CFQ-R       | Specific     | Association between physical factors and HRQOL | Paper                    | At entry                     |
|                                        |                 |                   |               |               |                    | HADS        | Generic      | Association between physical factors and HRQOL | Paper                    |                              |
| Bhati et al, 2012, US                  | Longitudinal    | Inpatient         | Child         | 13.1 (3.8)    | 22                 | CFQ-R       | Specific     | Correlate to diagnostic test                   | Not stated               | 3 assessments 1 week apart   |
| Blackwell et al, 2013, US              | Longitudinal    | RCT data          | Child         | 15.8 (2.9)    | 95                 | CFQ-R       | Specific     | Association between physical factors and HRQOL | Not stated               | 3 assessments 3 months apart |

| Author                                             | Type of study   | Setting           | Patient group | Age mean (SD) | Population size, N | Instruments | Type of PROM | Why PROM used?                                 | Method of administration | Timepoints |
|----------------------------------------------------|-----------------|-------------------|---------------|---------------|--------------------|-------------|--------------|------------------------------------------------|--------------------------|------------|
| Bodnar et al, 2014, Hungary                        | Cross-sectional | Outpatient Clinic | All Age       | 14.3 (4.81)   | 59                 | CFQ-R       | Specific     | Association between physical factors and HRQOL | Not stated               | At entry   |
| Bodnar et al, 2015, Hungary                        | Cross-sectional | Outpatient Clinic | Child         | 11.61 (2.56)  | 172                | PedsQL      | Generic      | Association between physical factors and HRQOL | Not stated               | At entry   |
| Borawska-Kowalczyk et al, 2015, Poland             | Cross-sectional | Outpatient Clinic | Child         | 14.41 (2.61)  | 70                 | CFQ-R       | Specific     | Association between physical factors and HRQOL | Not stated               | At entry   |
| Borawska-Kowalczyk et al, 2015, Poland and Hungary | Cross-sectional | Outpatient Clinic | Child         | 13.63 (2.93)  | 141                | CFQ-R       | Specific     | HRQOL in a population                          | Not stated               | At entry   |
| Bouka et al, 2012, Germany                         | Cross-sectional | Outpatient Clinic | Adult         | 34.4 (7.5)    | 55                 | CFQ-R       | Specific     | Association between physical factors and HRQOL | Not stated               | At entry   |

1  
2  
3  
4  
5  
6  
7  
8  
9  
10  
11  
12  
13  
14  
15  
16  
17  
18  
19  
20  
21  
22  
23  
24  
25  
26  
27  
28  
29  
30  
31  
32  
33  
34  
35  
36  
37  
38  
39  
40  
41  
42  
43  
44  
45  
46

| Author                              | Type of study                 | Setting                                            | Patient group | Age mean (SD) | Population size, N | Instruments | Type of PROM | Why PROM used?                                 | Method of administration | Timepoints                    |
|-------------------------------------|-------------------------------|----------------------------------------------------|---------------|---------------|--------------------|-------------|--------------|------------------------------------------------|--------------------------|-------------------------------|
| Bradley et al, 2013, UK             | Longitudinal                  | Not stated                                         | All Age       | 28.5 (8.2)    | 94                 | EQ-5D       | Generic      | Economic evaluation                            | Not stated               | At entry and 8-12 weeks later |
|                                     |                               |                                                    |               |               |                    | CFQ-R       | Specific     | Correlate to another PROM                      | Not stated               |                               |
| Cavanaugh et al, 2016, US           | Cross-sectional               | Outpatient Clinic                                  | Child         | 11.6 (3.6)    | 50                 | CFQ-R       | Specific     | Association between physical factors and HRQOL | Not stated               | At entry                      |
| Chan et al, 2016, US                | Cross-sectional               | Outpatient Clinic                                  | Child         | 12.9 (5.6)    | 47                 | SN-5        | Respiratory  | Association between physical factors and HRQOL | Paper                    | At entry                      |
| Chevreur et al, 2015, France        | Retrospective cross-sectional | Outpatient Clinic, CF Society, patient association | All Age       | 15.4 (11.3)   | 240                | EQ-5D       | Generic      | HRQOL in a population                          | Online                   | At entry                      |
| Chevreur et al, 2016, Multinational | Cross-sectional               | Outpatient Clinic, national registries             | All Age       | 18.5 (14.1)   | 905                | EQ-5D       | Generic      | HRQOL in a population                          | Postal or Online         | At entry                      |
| Cohen et al, 2010, Brazil           | Cross-sectional               | Outpatient Clinic                                  | All Age       | 12.5 (5.1)    | 75                 | CFQ         | Specific     | HRQOL in a population                          | Paper and Interview      | Not stated                    |

| Author                        | Type of study   | Setting           | Patient group | Age mean (SD) | Population size, N | Instruments | Type of PROM | Why PROM used?                                      | Method of administration | Timepoints                  |
|-------------------------------|-----------------|-------------------|---------------|---------------|--------------------|-------------|--------------|-----------------------------------------------------|--------------------------|-----------------------------|
| Cronly et al, 2019, Ireland   | Cross-sectional | Outpatient Clinic | Adult         | 30.5 (9.1)    | 147                | HADS        | Generic      | Association between psychological factors and HRQOL | Paper and Online         | At entry                    |
|                               |                 |                   |               |               |                    | CFQ-R       | Specific     | Association between psychological factors and HRQOL | Paper and Online         | At entry                    |
| Debska et al, 2014, Poland    | Cross-sectional | Outpatient Clinic | Adult         | Not stated    | 45                 | CFQOL       | Specific     | Association between physical factors and HRQOL      | Not stated               | At entry                    |
| Debska et al, 2015, Poland    | Longitudinal    | Inpatient         | All Age       | 21.1 (5.1)    | 67                 | CFQOL       | Specific     | Association between physical factors and HRQOL      | Not stated               | At entry and one year later |
| del Corral et al, 2016, Spain | Validation      | Inpatient         | Child         | 11.7 (3.1)    | 58                 | LCQ         | Respiratory  | Validate PROM                                       | Not stated               | At entry and 2 weeks later  |

1  
2  
3  
4  
5  
6  
7  
8  
9  
10  
11  
12  
13  
14  
15  
16  
17  
18  
19  
20  
21  
22  
23  
24  
25  
26  
27  
28  
29  
30  
31  
32  
33  
34  
35  
36  
37  
38  
39  
40  
41  
42  
43  
44  
45  
46

| Author                                        | Type of study   | Setting           | Patient group | Age mean (SD) | Population size, N | Instruments   | Type of PROM | Why PROM used?                               | Method of administration | Timepoints                  |
|-----------------------------------------------|-----------------|-------------------|---------------|---------------|--------------------|---------------|--------------|----------------------------------------------|--------------------------|-----------------------------|
| de Souza Serio dos Santos et al, 2013, Brazil | Validation      | Not stated        | Child         | Not stated    | 51                 | DISABKIDS-CFM | Specific     | Validate PROM                                | Not stated               | At entry                    |
| de Souza Serio dos Santos et al, 2014, Brazil | Validation      | Outpatient Clinic | Child         | 11.91 (2.79)  | 113                | DISABKIDS-CFM | Specific     | Validate PROM                                | Not stated               | At entry and 3 months later |
| Dill et al, 2013, US                          | Longitudinal    | Outpatient Clinic | Adult         | 32.52 (10.65) | 333                | CFQ-R         | Specific     | Examine trends in HRQOL over time            | Postal                   | 7 assessments 3 monthly     |
| Driscoll et al, 2015, US                      | Cross-sectional | RCT data          | Child         | 3.82 (1.27)   | 73                 | CFQ-R         | Specific     | Association between social factors and HRQOL | Not stated               | At entry                    |
|                                               |                 |                   |               |               |                    | PedsQL        | Generic      |                                              |                          |                             |
| Edwards et al, 2018, US                       | Qualitative     | Outpatient Clinic | Child         | Not stated    | 37                 | CFRSD         | Specific     | Develop PROM                                 | Online                   | At entry                    |
| Eidt-Koch et al, 2009, Germany                | Cross-sectional | Outpatient Clinic | Child         | Not stated    | 96                 | EQ-5D         | Generic      | Validate PROM                                | Not stated               | At entry                    |
|                                               |                 |                   |               |               |                    | CFQ           | Specific     | Used to validate another PROM                |                          |                             |

| Author                        | Type of study                 | Setting           | Patient group | Age mean (SD) | Population size, N | Instruments      | Type of PROM | Why PROM used?                                 | Method of administration | Timepoints                                            |
|-------------------------------|-------------------------------|-------------------|---------------|---------------|--------------------|------------------|--------------|------------------------------------------------|--------------------------|-------------------------------------------------------|
| Flume et al, 2018, US         | Retrospective cross-sectional | RCT data          | All Age       | Not stated    | 80                 | CFQ-R            | Specific     | Association between physical factors and HRQOL | Paper                    | 6 assessments<br>Baseline,<br>week 2, 4, 8,<br>16, 24 |
| Forte et al, 2015, Brazil     | Cross-sectional               | Outpatient Clinic | Adult         | 25.1 (8.8)    | 51                 | WHOQOL-BREF      | Generic      | Association between physical factors and HRQOL | Not stated               | At entry                                              |
|                               |                               |                   |               |               |                    | CFQOL            | Specific     | Association between physical factors and HRQOL |                          |                                                       |
| Gancz et al, 2018, Brazil     | Cross-sectional               | Outpatient Clinic | Child         | 16.4 (2.3)    | 31                 | CFQ-R            | Specific     | Association between physical factors and HRQOL | Interview                | At entry                                              |
| Goldbeck et al, 2010, Germany | Cross-sectional               | Outpatient Clinic | All Age       | 23.1 (9.1)    | 670                | HADS             | Generic      | HRQOL in a population                          | Not stated               | At entry                                              |
| Goss et al, 2009, US          | Qualitative                   | Outpatient Clinic | All Age       | 12.1 (4)      | 15                 | CF Symptom Diary | Specific     | Develop PROM                                   | Not administered         | Not administered                                      |

| Author                          | Type of study                | Setting                  | Patient group | Age mean (SD) | Population size, N | Instruments | Type of PROM | Why PROM used?                                            | Method of administration | Timepoints            |
|---------------------------------|------------------------------|--------------------------|---------------|---------------|--------------------|-------------|--------------|-----------------------------------------------------------|--------------------------|-----------------------|
| Groeneveld et al, 2012, Spain   | Cross-sectional              | Outpatient Clinic        | Child         | 11.6 (3.1)    | 28                 | CFQ-R       | Specific     | Association between social and physical factors and HRQOL | Paper and Interview      | At entry              |
| Habib et al, 2015, Canada       | Cross-sectional              | Outpatient Clinic        | Adult         | 34.9 (11.9)   | 103                | CFQ-R       | Specific     | Association between physical factors and HRQOL            | Paper                    | At entry              |
| Havermans et al, 2009, Belgium  | Cross-sectional              | Outpatient Clinic        | Adult         | 26.79 (8.15)  | 57                 | CFQ-R       | Specific     | Association between social factors and HRQOL              | Not stated               | At entry              |
| Hebestreit et al, 2014, Germany | Non-randomised control trial | Outpatient Clinic        | All Age       | 20.6 (5.8)    | 70                 | CFQ-R       | Specific     | Association between physical factors and HRQOL            | Paper                    | At entry and 6 months |
| Hegarty et al, 2009, Australia  | Cross-sectional              | Outpatient and Inpatient | Child         | 12.06 (3.97)  | 33                 | CFQ-R       | Specific     | HRQOL in a population                                     | Not stated               | At entry              |
| Hochwalder et al, 2017, Sweden  | Validation                   | Outpatient Clinic        | Adult         | 30.8 (11.98)  | 173                | CFQ-R       | Specific     | Validate PROM                                             | Not stated               | At entry              |

| Author                           | Type of study   | Setting           | Patient group | Age mean (SD) | Population size, N | Instruments | Type of PROM | Why PROM used?                                                 | Method of administration | Timepoints                   |
|----------------------------------|-----------------|-------------------|---------------|---------------|--------------------|-------------|--------------|----------------------------------------------------------------|--------------------------|------------------------------|
| Horck et al, 2017, Netherlands   | Longitudinal    | Outpatient Clinic | Child         | 10.3 (3.6)    | 49                 | CFQ-R       | Specific     | Association between physical factors and HRQOL                 | Paper and Interview      | 3 assessments 6 months apart |
| Ihle et al, 2015, Germany        | Cross-sectional | Outpatient Clinic | Adult         | 50 (11.9)     | 152                | SF-36       | Generic      | Association between physical and demographic factors and HRQOL | Paper                    | At entry                     |
|                                  |                 |                   |               |               |                    | SGRQ        | Respiratory  | Association between physical and demographic factors and HRQOL |                          |                              |
|                                  |                 |                   |               |               |                    | PLC         | Generic      | Association between physical and demographic factors and HRQOL |                          |                              |
| Iscar-Urrutia et al, 2018, Spain | Cross-sectional | Outpatient Clinic | Adult         | 32            | 23                 | CFQ-R       | Specific     | Association between physical factors and HRQOL                 | Paper                    | At entry                     |



| Author                         | Type of study   | Setting                  | Patient group | Age mean (SD) | Population size, N | Instruments | Type of PROM | Why PROM used?                                      | Method of administration | Timepoints |
|--------------------------------|-----------------|--------------------------|---------------|---------------|--------------------|-------------|--------------|-----------------------------------------------------|--------------------------|------------|
| Kang et al, 2017, Brazil       | Cross-sectional | Outpatient Clinic        | All Age       | 25.71 (8.13)  | 91                 | SNOT-22     | Respiratory  | Association between physical factors and HRQOL      | Not stated               | At entry   |
| Kelemen et al, 2011, Australia | Cross-sectional | Outpatient Clinic        | Adult         | 29.4 (8.5)    | 73                 | CFQOL       | Specific     | Association between physical factors and HRQOL      | Not stated               | At entry   |
| Kianifar et al, 2013, Iran     | Cross-sectional | Outpatient Clinic        | Child         | 5 (3.4)       | 36                 | PedsQL      | Generic      | HRQOL in a population                               | Not stated               | Not stated |
| Kilcoyne et al, 2016           | Cross-sectional | Outpatient and Inpatient | Adult         | 27.8 (7.9)    | 101                | CFQ-R       | Specific     | Correlate to diagnostic test                        | Paper                    | At entry   |
| Kir et al, 2015, India         | Cross-sectional | Inpatient                | Child         | 11.5 (4.5)    | 59                 | CFQ-R       | Specific     | HRQOL in a population                               | Paper and Interview      | At entry   |
| Lectzin et al, 2016, US        | Cross-sectional | Outpatient Clinic        | Child         | 15.6 (2.5)    | 73                 | CFQ-R       | Specific     | Association between physical factors and HRQOL      | Online                   | At entry   |
| McHugh et al, 2016, UK         | Cross-sectional | Online Support Group     | Adult         | 29 (8.34)     | 122                | CFQ-R       | Specific     | Association between psychological factors and HRQOL | Not stated               | Not stated |

| Author                     | Type of study      | Setting           | Patient group | Age mean (SD) | Population size, N | Instruments | Type of PROM | Why PROM used?                                      | Method of administration | Timepoints                   |
|----------------------------|--------------------|-------------------|---------------|---------------|--------------------|-------------|--------------|-----------------------------------------------------|--------------------------|------------------------------|
| Modi et al, 2009, US       | Prospective cohort | Inpatient         | Child         | 13.6 (3.7)    | 52                 | PedsQL      | Generic      | HRQOL as outcome of intervention                    | Paper                    | At entry and 2 weeks later   |
|                            |                    |                   |               |               |                    | CFQ-R       | Specific     | HRQOL as outcome of intervention                    |                          |                              |
| Norrish et al, 2015, Oman  | Development        | Outpatient Clinic | Child         | 6             | 12                 | CF-SPS      | Specific     | Develop PROM                                        | Interview                | Not stated                   |
| Oliver et al, 2015, US     | Longitudinal       | Outpatient Clinic | All Age       | 19 (3.2)      | 71                 | HADS        | Generic      | Association between social factors and HRQOL        | Paper and Online         | 3 assessments 6 months apart |
|                            |                    |                   |               |               |                    | CFQ-R       | Specific     | Association between social factors and HRQOL        |                          |                              |
| Olveira et al, 2016, Spain | Cross-sectional    | Outpatient Clinic | Adult         | 28.1 (8.2)    | 336                | HADS        | Generic      | Association between psychological factors and HRQOL | Paper                    | At entry                     |
|                            |                    |                   |               |               |                    | CFQ-R       | Specific     | Association between psychological factors and HRQOL |                          |                              |

| Author                                 | Type of study   | Setting                        | Patient group | Age mean (SD) | Population size, N | Instruments | Type of PROM | Why PROM used?                                      | Method of administration                 | Timepoints                                                |
|----------------------------------------|-----------------|--------------------------------|---------------|---------------|--------------------|-------------|--------------|-----------------------------------------------------|------------------------------------------|-----------------------------------------------------------|
| Platten et al, 2013, UK                | Cross-sectional | National database              | Adult         | 27.8 (9.2)    | 74                 | CFQ-R       | Specific     | Association between psychological factors and HRQOL | Online                                   | At entry                                                  |
|                                        |                 |                                |               |               |                    | CORE-OM     | Generic      | HRQOL in a population                               |                                          |                                                           |
| Quittner et al, 2009, US and Australia | Validation      | RCT data                       | All Age       | Not stated    | 200                | CFQ-R       | Specific     | Determine MCID                                      | Not stated                               | Not stated                                                |
| Quittner et al, 2010, US               | Cross-sectional | Longitudinal cohort study data | All Age       | Not stated    | 4751               | CFQ-R       | Specific     | Association between demographic factors and HRQOL   | Paper and Interview                      | At entry                                                  |
| Quittner et al,                        | Validation      | Longitudinal cohort study data | All Age       | Not stated    | 7330               | CFQ-R       | Specific     | Validate PROM                                       | Interview for children, other not stated | At entry                                                  |
| Quon et al, 2015, US                   | Cross-sectional | Outpatient Clinic              | Adult         | 28.6 (8.8)    | 153                | PHQ-9       | Generic      | HRQOL in a population                               | Not stated                               | At entry                                                  |
|                                        |                 |                                |               |               |                    | GAD-7       | Generic      | HRQOL in a population                               |                                          |                                                           |
| Ricotti et al, 2017, Italy             | Longitudinal    | Outpatient Clinic              | Adult         | 49.87 (11.8)  | 57                 | SF-36       | Generic      | HRQOL in a population                               | Interview                                | Four assessments Before LTx and 6,12, 24 months after LTx |
|                                        |                 |                                |               |               |                    | SGRQ        | Respiratory  | HRQOL in a population                               |                                          |                                                           |
|                                        |                 |                                |               |               |                    | GHQ         | Generic      | HRQOL in a population                               |                                          |                                                           |

| Author                       | Type of study                | Setting                        | Patient group | Age mean (SD) | Population size, N | Instruments | Type of PROM | Why PROM used?                                      | Method of administration | Timepoints                  |
|------------------------------|------------------------------|--------------------------------|---------------|---------------|--------------------|-------------|--------------|-----------------------------------------------------|--------------------------|-----------------------------|
| Salek et al,                 | Cross-sectional              | Outpatient and Inpatient       | Adult         | 26.1 (7.3)    | 70                 | UKSIP       | Generic      | Used to validate another PROM                       | Postal and interview     | At entry                    |
|                              |                              |                                |               |               |                    | CFQOL       | Specific     | Validate PROM                                       |                          |                             |
| Sawicki et al, 2009, US      | Cross-sectional              | Longitudinal cohort study data | Adult         | 35.4 (10)     | 204                | CFQ-R       | Specific     | HRQOL in a population                               | Not stated               | At entry                    |
| Sawicki, 2011, US            | Cross-sectional              | Outpatient Clinic              | Adult         | 35.8 (10.3)   | 199                | CFQ-R       | Specific     | Association between psychological factors and HRQOL | Not stated               | Not stated                  |
| Sawicki et al, 2011, US      | Longitudinal                 | National database              | All Age       | Not stated    | 1366               | CFQ-R       | Specific     | Association between physical factors and HRQOL      | Not stated               | At entry and one year later |
| Schmidt et al, 2009, Germany | Validation                   | Outpatient Clinic              | Child         | 10.2 (1.9)    | 136                | CFQ-R       | Specific     | Validate PROM                                       | Paper and Interview      | At entry                    |
| Schmidt et al, 2011, Denmark | Non-randomised control trial | Outpatient Clinic              | All Age       | Not stated    | 38                 | CFQ-R       | Specific     | Association between physical factors and HRQOL      | Not stated               | At entry and 3 months later |

| Author                           | Type of study                 | Setting                 | Patient group | Age mean (SD) | Population size, N | Instruments | Type of PROM | Why PROM used?                                      | Method of administration | Timepoints                                                                   |
|----------------------------------|-------------------------------|-------------------------|---------------|---------------|--------------------|-------------|--------------|-----------------------------------------------------|--------------------------|------------------------------------------------------------------------------|
| Shoff et al, 2013, US            | Longitudinal                  | RCT data                | Child         | 13.5          | 95                 | CFQ         | Specific     | Association between social factors and HRQOL        | Paper and Interview      | 3 assessments Yearly                                                         |
| Simon et al, 2011, US            | Cross-sectional               | Outpatient Clinic       | Child         | 13.6 (2.3)    | 54                 | CFQ-R       | Specific     | Association between psychological factors and HRQOL | Paper                    | At entry                                                                     |
| Sole et al, 2016, Spain          | Longitudinal                  | Outpatient Clinic       | Adult         | 25.4 (8.5)    | 152                | CFQ-R       | Specific     | HRQOL as a predictor                                | Not stated               | 12 assessments 3 monthly                                                     |
| Sole et al, 2018, Spain          | Validation                    | Outpatient Clinic       | All Age       | Not stated    | 50                 | e-CFQ-R     | Specific     | Validate PROM                                       | Software program         | At entry and 15 days later                                                   |
| Solem et al, 2016, US            | Longitudinal                  | RCT data                | All Age       | 25.5 (9.5)    | 161                | EQ-5D       | Generic      | Association between physical factors and HRQOL      | Not stated               | 8 assessments Baseline, day 15, week 8, every 8 weeks after through 48 weeks |
| Stofa et al, 2016, Greece        | Cross-sectional               | Not stated              | Adult         | Not stated    | 77                 | CFQOL       | Specific     | HRQOL in a population                               | Not stated               | At entry                                                                     |
| Tepper et al, 2013, Netherlands  | Retrospective cross-sectional | Outpatient Clinic       | Child         | 13.4          | 72                 | CFQ-R RSS   | Specific     | Correlate to diagnostic test                        | Paper                    | 3 assessments Yearly                                                         |
| Tibosch et al, 2011, Netherlands | Cross-sectional               | Healthy school children | Child         | 14.52 (3.16)  | 478                | CFQ         | Specific     | HRQOL in a population                               | Paper and Interview      | At entry                                                                     |



| Author                           | Type of study   | Setting                  | Patient group | Age mean (SD) | Population size, N | Instruments | Type of PROM | Why PROM used?                                    | Method of administration | Timepoints                                                     |
|----------------------------------|-----------------|--------------------------|---------------|---------------|--------------------|-------------|--------------|---------------------------------------------------|--------------------------|----------------------------------------------------------------|
| Uchmanowicz et al, 2015, Poland  | Cross-sectional | Outpatient Clinic        | Adult         | 24.83 (6.98)  | 30                 | CFQOL       | Specific     | Association between demographic factors and HRQOL | Not stated               | Not stated                                                     |
| Vandeleur et al, 2018, Australia | Cross-sectional | Outpatient Clinic        | Child         | Not stated    | 87                 | CFQ-R       | Specific     | Association between physical factors and HRQOL    | Not stated               | Not stated                                                     |
|                                  |                 |                          |               |               |                    | PedsQL      | Generic      | Association between physical factors and HRQOL    |                          |                                                                |
| Ward et al, 2017, Australia      | Validation      | Outpatient and Inpatient | Adult         | 29 (9.3)      | 59                 | LCQ         | Respiratory  | Validate PROM                                     | Paper                    | 3 assessments<br>At entry, one week later and four weeks later |
|                                  |                 |                          |               |               |                    | ReS-CF      | Specific     | Develop PROM                                      |                          |                                                                |
|                                  |                 |                          |               |               |                    | CFQ-R       | Specific     | Used to validate another PROM                     |                          |                                                                |
| Xie et al, 2017, US              | Validation      | Not stated               | Child         | 8.7 (5.28)    | 165                | SN-5        | Respiratory  | Validate PROM in new age group                    | Not stated               | At entry and median 7 months later                             |

| Author                       | Type of study   | Setting           | Patient group | Age mean (SD) | Population size, N | Instruments           | Type of PROM | Why PROM used?                                      | Method of administration | Timepoints                 |
|------------------------------|-----------------|-------------------|---------------|---------------|--------------------|-----------------------|--------------|-----------------------------------------------------|--------------------------|----------------------------|
| Yohannes et al, 2011, UK     | Validation      | Outpatient Clinic | Adult         | 29.6 (8.9)    | 121                | Single item QOL scale | Generic      | Develop PROM                                        | Paper                    | At entry and 10 days later |
|                              |                 |                   |               |               |                    | CFQOL                 | Specific     | Used to validate another PROM                       |                          |                            |
|                              |                 |                   |               |               |                    | HADS                  | Generic      | Used to validate another PROM                       |                          |                            |
| Yohannes et al, 2012, UK     | Cross-sectional | Outpatient Clinic | Adult         | 30 (8.8)      | 121                | CFQOL                 | Specific     | Association between psychological factors and HRQOL | Paper                    | At entry                   |
|                              |                 |                   |               |               |                    | HADS                  | Generic      | HRQOL in a population                               |                          |                            |
| Young et al, 2011, Australia | Cross-sectional | Outpatient Clinic | Adult         | 31 (8)        | 60                 | CFQOL                 | Specific     | Association between physical factors and HRQOL      | Not stated               | Not stated                 |
| Yuksel et al, 2013, Turkey   | Validation      | Outpatient Clinic | Child         | 9.8 (2.6)     | 51                 | CFQ-R                 | Specific     | Validate PROM                                       | Not stated               | Not stated                 |
|                              |                 |                   |               |               |                    | KINDL                 | Generic      | Used to validate another PROM                       |                          |                            |



1  
2  
3  
4  
5  
6  
7  
8  
9  
10  
11  
12  
13  
14  
15  
16  
17  
18  
19  
20  
21  
22  
23  
24  
25  
26  
27  
28  
29  
30  
31  
32  
33  
34  
35  
36  
37  
38  
39  
40  
41  
42  
43  
44  
45  
46

| Author           | Type of Review | Studies included | Aims                                                                                                                                                                                                                                                                               | Instruments (n)                                                                                                                                                                                                                                                                                                                                                                                                             | Patient group | Type of PROM | Key Findings                                                                                                                                                                                                                                                                                                                                                                                                                                                                 |
|------------------|----------------|------------------|------------------------------------------------------------------------------------------------------------------------------------------------------------------------------------------------------------------------------------------------------------------------------------|-----------------------------------------------------------------------------------------------------------------------------------------------------------------------------------------------------------------------------------------------------------------------------------------------------------------------------------------------------------------------------------------------------------------------------|---------------|--------------|------------------------------------------------------------------------------------------------------------------------------------------------------------------------------------------------------------------------------------------------------------------------------------------------------------------------------------------------------------------------------------------------------------------------------------------------------------------------------|
| Abbott, 2009, UK | Narrative      | Not stated       | <ol style="list-style-type: none"> <li>1. Instruments used to measure HRQOL</li> <li>2. Factors that influence reporting HRQOL</li> <li>3. Monitoring of HRQOL in clinical practice</li> <li>4. HRQOL as outcome measure</li> <li>5. whether HRQOL can predict survival</li> </ol> | <ul style="list-style-type: none"> <li>▪Chronic respiratory disease questionnaire</li> <li>▪St George's respiratory questionnaire</li> <li>▪ SNOT-16</li> <li>▪CFQ</li> <li>▪CFQOL</li> <li>▪FLZ-CF</li> <li>▪DISABKIDS</li> <li>▪ Memorial Symptom Assessment Scale (MSAS)</li> <li>▪ Living with CF Questionnaire</li> </ul>                                                                                              | Not stated    | Both         | <ul style="list-style-type: none"> <li>▪ CF patients report lower physical scores but similar psychosocial HRQOL</li> <li>▪ SNOT-16 (sinus specific PROM) showed severity of sinus disease impacted quality of life</li> <li>▪ HADS associated with CFQ in both physical and social domains</li> <li>▪ How person reports HRQOL can change over time altered perceptions of health</li> <li>▪ Guidelines recommend inclusion of PROM as outcome in clinical trial</li> </ul> |
| Abbott, 2011, UK | Narrative      | Not stated       | Describe current use of PROMs as endpoints                                                                                                                                                                                                                                         | <ul style="list-style-type: none"> <li>▪Chronic respiratory disease questionnaire</li> <li>▪St George's respiratory questionnaire</li> <li>▪ Sickness Impact Profile</li> <li>▪Nottingham Health Profile</li> <li>▪Short Form 36</li> <li>▪PedsQL</li> <li>▪CFQ</li> <li>▪CFQOL</li> <li>▪FLZ-CF</li> <li>▪DISABKIDS</li> <li>▪ Memorial Symptom Assessment Scale (MSAS)</li> <li>▪ Living with CF Questionnaire</li> </ul> | Not stated    | Both         | <ul style="list-style-type: none"> <li>▪ FDA approved only respiratory domain of CFQ - best test retest reliability</li> <li>▪ Before inclusion in clinical trials psychometric properties (esp test-retest reliability) and ceiling effects should be considered</li> <li>▪ Limitations; hard to see effect with HRQOL when domains change differently and MCID difficult to interpret</li> </ul>                                                                           |

| Author              | Type of Review | Studies included | Aims                                                                                                                                                                                              | Instruments (n)     | Patient group | Type of PROM | Key Findings                                                                                                                                                                                                                                                                                                                                                                                                                                                                                                                     |
|---------------------|----------------|------------------|---------------------------------------------------------------------------------------------------------------------------------------------------------------------------------------------------|---------------------|---------------|--------------|----------------------------------------------------------------------------------------------------------------------------------------------------------------------------------------------------------------------------------------------------------------------------------------------------------------------------------------------------------------------------------------------------------------------------------------------------------------------------------------------------------------------------------|
| Blackwell, 2013, US | Narrative      | Not stated       | <ol style="list-style-type: none"> <li>1. Describe development of PROs</li> <li>2. Describe use of PROs as outcome</li> <li>3. Identify benefits of utilising PROs in clinical setting</li> </ol> | CFQ-R, SF-36, KINDL | Not stated    | Both         | <ul style="list-style-type: none"> <li>▪ Generic instruments (QWB and CHQ) had unacceptable sensitivity and specificity</li> <li>▪ Generic PROMs not approved in drug trials by FDA</li> <li>▪ PROs approved as an outcome for clinical trials by FDA and EMA</li> <li>▪ Used in clinical practice - facilitate communication and collaborative medicine</li> <li>▪ electronic PROMs better adherence, less missing data, and cheaper</li> <li>▪ In clinical trials PROs should be measured as frequently as possible</li> </ul> |
| Habib, 2015, Canada | Systematic     | 23               | Identify sociodemographic and clinical factors associated with HRQOL among adolescents and adults with CF                                                                                         | CFQ-R               | >14yo         | Specific     | <ul style="list-style-type: none"> <li>▪ FEV1 % predicted associated with all HRQOL domains except digestion, social functioning and emotional functioning</li> <li>▪ BMI associated with body image and weight</li> <li>▪ Age negatively correlated with treatment burden</li> <li>▪ 57% observational studies included low quality according to GRADE system</li> </ul>                                                                                                                                                        |
| Gomes, 2018, US     | Systematic     | 5                | Evaluate relationship between weight and HRQOL                                                                                                                                                    | CFQ-R, CFQOL        | Adults        | Specific     | <ul style="list-style-type: none"> <li>▪ Body image most closely associated, also physical and social functioning</li> <li>▪ Females higher body image score than males - possibly as thinner body more sought after in women</li> </ul>                                                                                                                                                                                                                                                                                         |

1  
2  
3  
4  
5  
6  
7  
8  
9  
10  
11  
12  
13  
14  
15  
16  
17  
18  
19  
20  
21  
22  
23  
24  
25  
26  
27  
28  
29  
30  
31  
32  
33  
34  
35  
36  
37  
38  
39  
40  
41  
42  
43  
44  
45  
46

| Author          | Type of Review | Studies included | Aims                                                                                    | Instruments (n) | Patient group | Type of PROM | Key Findings                                                                                                                                                                                                                                                                          |
|-----------------|----------------|------------------|-----------------------------------------------------------------------------------------|-----------------|---------------|--------------|---------------------------------------------------------------------------------------------------------------------------------------------------------------------------------------------------------------------------------------------------------------------------------------|
| Royce, 2011, US | Narrative      | Not stated       | Assess contribution of therapeutic interventions on longevity and quality of life in CF | CFQ-R           | Not stated    | Specific     | <ul style="list-style-type: none"> <li>▪ CFQ-R used to assoc physical: pulmonary function, frequency of exacerbation, demographic: sex effects, and longitudinal effects</li> <li>▪ Clinical trials using CFQ-R include tobramycin, dornase alpha, azithromycin, aztreonam</li> </ul> |

For peer review only

# Reporting checklist for systematic review and meta-analysis.

Based on the PRISMA guidelines.

## Instructions to authors

Complete this checklist by entering the page numbers from your manuscript where readers will find each of the items listed below.

Your article may not currently address all the items on the checklist. Please modify your text to include the missing information. If you are certain that an item does not apply, please write "n/a" and provide a short explanation.

Upload your completed checklist as an extra file when you submit to a journal.

In your methods section, say that you used the PRISMA reporting guidelines, and cite them as:

Moher D, Liberati A, Tetzlaff J, Altman DG, The PRISMA Group. Preferred Reporting Items for Systematic Reviews and Meta-Analyses: The PRISMA Statement

|              | Reporting Item                                                                         | Page Number |
|--------------|----------------------------------------------------------------------------------------|-------------|
| <b>Title</b> |                                                                                        |             |
|              | <a href="#">#1</a> Identify the report as a systematic review, meta-analysis, or both. | 1           |

## Abstract

|    |                      |                    |                                                                 |     |
|----|----------------------|--------------------|-----------------------------------------------------------------|-----|
| 1  | Structured           | <a href="#">#2</a> | Provide a structured summary including, as applicable:          | 2   |
| 2  |                      |                    |                                                                 |     |
| 3  | summary              |                    | background; objectives; data sources; study eligibility         |     |
| 4  |                      |                    | criteria, participants, and interventions; study appraisal and  |     |
| 5  |                      |                    | synthesis methods; results; limitations; conclusions and        |     |
| 6  |                      |                    | implications of key findings; systematic review registration    |     |
| 7  |                      |                    | number                                                          |     |
| 8  |                      |                    |                                                                 |     |
| 9  |                      |                    |                                                                 |     |
| 10 |                      |                    |                                                                 |     |
| 11 |                      |                    |                                                                 |     |
| 12 |                      |                    |                                                                 |     |
| 13 |                      |                    |                                                                 |     |
| 14 |                      |                    |                                                                 |     |
| 15 | <b>Introduction</b>  |                    |                                                                 |     |
| 16 |                      |                    |                                                                 |     |
| 17 |                      |                    |                                                                 |     |
| 18 |                      |                    |                                                                 |     |
| 19 | Rationale            | <a href="#">#3</a> | Describe the rationale for the review in the context of what    | 5   |
| 20 |                      |                    | is already known.                                               |     |
| 21 |                      |                    |                                                                 |     |
| 22 |                      |                    |                                                                 |     |
| 23 |                      |                    |                                                                 |     |
| 24 | Objectives           | <a href="#">#4</a> | Provide an explicit statement of questions being addressed      | 6   |
| 25 |                      |                    | with reference to participants, interventions, comparisons,     |     |
| 26 |                      |                    | outcomes, and study design (PICOS).                             |     |
| 27 |                      |                    |                                                                 |     |
| 28 |                      |                    |                                                                 |     |
| 29 |                      |                    |                                                                 |     |
| 30 |                      |                    |                                                                 |     |
| 31 |                      |                    |                                                                 |     |
| 32 | <b>Methods</b>       |                    |                                                                 |     |
| 33 |                      |                    |                                                                 |     |
| 34 |                      |                    |                                                                 |     |
| 35 | Protocol and         | <a href="#">#5</a> | Indicate if a review protocol exists, if and where it can be    | 6   |
| 36 | registration         |                    | accessed (e.g., Web address) and, if available, provide         |     |
| 37 |                      |                    | registration information including the registration number.     |     |
| 38 |                      |                    |                                                                 |     |
| 39 |                      |                    |                                                                 |     |
| 40 |                      |                    |                                                                 |     |
| 41 |                      |                    |                                                                 |     |
| 42 | Eligibility criteria | <a href="#">#6</a> | Specify study characteristics (e.g., PICOS, length of follow-   | 6-7 |
| 43 |                      |                    | up) and report characteristics (e.g., years considered,         |     |
| 44 |                      |                    | language, publication status) used as criteria for eligibility, |     |
| 45 |                      |                    | giving rational                                                 |     |
| 46 |                      |                    |                                                                 |     |
| 47 |                      |                    |                                                                 |     |
| 48 |                      |                    |                                                                 |     |
| 49 |                      |                    |                                                                 |     |
| 50 |                      |                    |                                                                 |     |
| 51 |                      |                    |                                                                 |     |
| 52 | Information          | <a href="#">#7</a> | Describe all information sources in the search (e.g.,           | 7   |
| 53 | sources              |                    | databases with dates of coverage, contact with study            |     |
| 54 |                      |                    |                                                                 |     |
| 55 |                      |                    |                                                                 |     |
| 56 |                      |                    |                                                                 |     |
| 57 |                      |                    |                                                                 |     |
| 58 |                      |                    |                                                                 |     |
| 59 |                      |                    |                                                                 |     |
| 60 |                      |                    |                                                                 |     |

|    |                    |                                                                                  |            |
|----|--------------------|----------------------------------------------------------------------------------|------------|
| 1  |                    | authors to identify additional studies) and date last                            |            |
| 2  |                    | searched.                                                                        |            |
| 3  |                    |                                                                                  |            |
| 4  |                    |                                                                                  |            |
| 5  |                    |                                                                                  |            |
| 6  | Search             | <a href="#">#8</a> Present full electronic search strategy for at least one      | Supplement |
| 7  |                    |                                                                                  |            |
| 8  |                    | database, including any limits used, such that it could be                       | 1          |
| 9  |                    |                                                                                  |            |
| 10 |                    | repeated.                                                                        |            |
| 11 |                    |                                                                                  |            |
| 12 |                    |                                                                                  |            |
| 13 | Study selection    | <a href="#">#9</a> State the process for selecting studies (i.e., for screening, | 7          |
| 14 |                    |                                                                                  |            |
| 15 |                    | for determining eligibility, for inclusion in the systematic                     |            |
| 16 |                    | review, and, if applicable, for inclusion in the meta-                           |            |
| 17 |                    | analysis).                                                                       |            |
| 18 |                    |                                                                                  |            |
| 19 |                    |                                                                                  |            |
| 20 |                    |                                                                                  |            |
| 21 |                    |                                                                                  |            |
| 22 |                    |                                                                                  |            |
| 23 | Data collection    | <a href="#">#10</a> Describe the method of data extraction from reports (e.g.,   | 7          |
| 24 |                    |                                                                                  |            |
| 25 | process            | piloted forms, independently by two reviewers) and any                           |            |
| 26 |                    |                                                                                  |            |
| 27 |                    | processes for obtaining and confirming data from                                 |            |
| 28 |                    |                                                                                  |            |
| 29 |                    | investigators.                                                                   |            |
| 30 |                    |                                                                                  |            |
| 31 |                    |                                                                                  |            |
| 32 |                    |                                                                                  |            |
| 33 | Data items         | <a href="#">#11</a> List and define all variables for which data were sought     | 7          |
| 34 |                    |                                                                                  |            |
| 35 |                    | (e.g., PICOS, funding sources), and any assumptions and                          |            |
| 36 |                    |                                                                                  |            |
| 37 |                    | simplifications made.                                                            |            |
| 38 |                    |                                                                                  |            |
| 39 |                    |                                                                                  |            |
| 40 |                    |                                                                                  |            |
| 41 | Risk of bias in    | <a href="#">#12</a> Describe methods used for assessing risk of bias in          | 7          |
| 42 |                    |                                                                                  |            |
| 43 | individual studies | individual studies (including specification of whether this                      |            |
| 44 |                    |                                                                                  |            |
| 45 |                    | was done at the study or outcome level, or both), and how                        |            |
| 46 |                    |                                                                                  |            |
| 47 |                    | this information is to be used in any data synthesis.                            |            |
| 48 |                    |                                                                                  |            |
| 49 |                    |                                                                                  |            |
| 50 |                    |                                                                                  |            |
| 51 | Summary            | <a href="#">#13</a> State the principal summary measures (e.g., risk ratio,      | NA         |
| 52 |                    |                                                                                  |            |
| 53 | measures           | difference in means).                                                            |            |
| 54 |                    |                                                                                  |            |
| 55 |                    |                                                                                  |            |
| 56 |                    |                                                                                  |            |
| 57 |                    |                                                                                  |            |
| 58 |                    |                                                                                  |            |
| 59 |                    |                                                                                  |            |
| 60 |                    |                                                                                  |            |

|    |                    |                     |                                                               |            |
|----|--------------------|---------------------|---------------------------------------------------------------|------------|
| 1  | Planned            | <a href="#">#14</a> | Describe the methods of handling data and combining           | 7          |
| 2  |                    |                     |                                                               |            |
| 3  | methods of         |                     | results of studies, if done, including measures of            |            |
| 4  |                    |                     |                                                               |            |
| 5  | analysis           |                     | consistency (e.g., I <sup>2</sup> ) for each meta-analysis.   |            |
| 6  |                    |                     |                                                               |            |
| 7  |                    |                     |                                                               |            |
| 8  |                    |                     |                                                               |            |
| 9  | Risk of bias       | <a href="#">#15</a> | Specify any assessment of risk of bias that may affect the    | NA         |
| 10 |                    |                     |                                                               |            |
| 11 | across studies     |                     | cumulative evidence (e.g., publication bias, selective        |            |
| 12 |                    |                     |                                                               |            |
| 13 |                    |                     | reporting within studies).                                    |            |
| 14 |                    |                     |                                                               |            |
| 15 |                    |                     |                                                               |            |
| 16 | Additional         | <a href="#">#16</a> | Describe methods of additional analyses (e.g., sensitivity or | NA         |
| 17 |                    |                     |                                                               |            |
| 18 | analyses           |                     | subgroup analyses, meta-regression), if done, indicating      |            |
| 19 |                    |                     |                                                               |            |
| 20 |                    |                     | which were pre-specified.                                     |            |
| 21 |                    |                     |                                                               |            |
| 22 |                    |                     |                                                               |            |
| 23 |                    |                     |                                                               |            |
| 24 | <b>Results</b>     |                     |                                                               |            |
| 25 |                    |                     |                                                               |            |
| 26 |                    |                     |                                                               |            |
| 27 | Study selection    | <a href="#">#17</a> | Give numbers of studies screened, assessed for eligibility,   | 8          |
| 28 |                    |                     |                                                               |            |
| 29 |                    |                     | and included in the review, with reasons for exclusions at    |            |
| 30 |                    |                     |                                                               |            |
| 31 |                    |                     | each stage, ideally with a <a href="#">flow diagram</a> .     |            |
| 32 |                    |                     |                                                               |            |
| 33 |                    |                     |                                                               |            |
| 34 |                    |                     |                                                               |            |
| 35 | Study              | <a href="#">#18</a> | For each study, present characteristics for which data were   | Supplement |
| 36 |                    |                     |                                                               |            |
| 37 | characteristics    |                     | extracted (e.g., study size, PICOS, follow-up period) and     | 3          |
| 38 |                    |                     |                                                               |            |
| 39 |                    |                     | provide the citation.                                         |            |
| 40 |                    |                     |                                                               |            |
| 41 |                    |                     |                                                               |            |
| 42 |                    |                     |                                                               |            |
| 43 | Risk of bias       | <a href="#">#19</a> | Present data on risk of bias of each study and, if available, | Supplement |
| 44 |                    |                     |                                                               |            |
| 45 | within studies     |                     | any outcome-level assessment (see Item 12).                   | 2          |
| 46 |                    |                     |                                                               |            |
| 47 |                    |                     |                                                               |            |
| 48 | Results of         | <a href="#">#20</a> | For all outcomes considered (benefits and harms), present,    | NA         |
| 49 |                    |                     |                                                               |            |
| 50 | individual studies |                     | for each study: (a) simple summary data for each              |            |
| 51 |                    |                     |                                                               |            |
| 52 |                    |                     | intervention group and (b) effect estimates and confidence    |            |
| 53 |                    |                     |                                                               |            |
| 54 |                    |                     | intervals, ideally with a forest plot.                        |            |
| 55 |                    |                     |                                                               |            |
| 56 |                    |                     |                                                               |            |
| 57 |                    |                     |                                                               |            |
| 58 |                    |                     |                                                               |            |
| 59 |                    |                     |                                                               |            |
| 60 |                    |                     |                                                               |            |

|    |                   |                     |                                                                 |       |
|----|-------------------|---------------------|-----------------------------------------------------------------|-------|
| 1  | Synthesis of      | <a href="#">#21</a> | Present the main results of the review. If meta-analyses are    | 9-16  |
| 2  |                   |                     |                                                                 |       |
| 3  | results           |                     | done, include for each, confidence intervals and measures       |       |
| 4  |                   |                     |                                                                 |       |
| 5  |                   |                     | of consistency.                                                 |       |
| 6  |                   |                     |                                                                 |       |
| 7  |                   |                     |                                                                 |       |
| 8  |                   |                     |                                                                 |       |
| 9  | Risk of bias      | <a href="#">#22</a> | Present results of any assessment of risk of bias across        | 16    |
| 10 |                   |                     |                                                                 |       |
| 11 | across studies    |                     | studies (see Item 15).                                          |       |
| 12 |                   |                     |                                                                 |       |
| 13 |                   |                     |                                                                 |       |
| 14 | Additional        | <a href="#">#23</a> | Give results of additional analyses, if done (e.g., sensitivity | NA    |
| 15 |                   |                     |                                                                 |       |
| 16 | analysis          |                     | or subgroup analyses, meta-regression [see Item 16]).           |       |
| 17 |                   |                     |                                                                 |       |
| 18 |                   |                     |                                                                 |       |
| 19 | <b>Discussion</b> |                     |                                                                 |       |
| 20 |                   |                     |                                                                 |       |
| 21 |                   |                     |                                                                 |       |
| 22 | Summary of        | <a href="#">#24</a> | Summarize the main findings, including the strength of          | 17-18 |
| 23 |                   |                     |                                                                 |       |
| 24 | Evidence          |                     | evidence for each main outcome; consider their relevance        |       |
| 25 |                   |                     |                                                                 |       |
| 26 |                   |                     | to key groups (e.g., health care providers, users, and policy   |       |
| 27 |                   |                     |                                                                 |       |
| 28 |                   |                     | makers                                                          |       |
| 29 |                   |                     |                                                                 |       |
| 30 |                   |                     |                                                                 |       |
| 31 |                   |                     |                                                                 |       |
| 32 | Limitations       | <a href="#">#25</a> | Discuss limitations at study and outcome level (e.g., risk of   | 19    |
| 33 |                   |                     |                                                                 |       |
| 34 |                   |                     | bias), and at review level (e.g., incomplete retrieval of       |       |
| 35 |                   |                     |                                                                 |       |
| 36 |                   |                     | identified research, reporting bias).                           |       |
| 37 |                   |                     |                                                                 |       |
| 38 |                   |                     |                                                                 |       |
| 39 |                   |                     |                                                                 |       |
| 40 | Conclusions       | <a href="#">#26</a> | Provide a general interpretation of the results in the context  | 20    |
| 41 |                   |                     |                                                                 |       |
| 42 |                   |                     | of other evidence, and implications for future research.        |       |
| 43 |                   |                     |                                                                 |       |
| 44 |                   |                     |                                                                 |       |
| 45 | <b>Funding</b>    |                     |                                                                 |       |
| 46 |                   |                     |                                                                 |       |
| 47 |                   |                     |                                                                 |       |
| 48 | Funding           | <a href="#">#27</a> | Describe sources of funding or other support (e.g., supply of   | 20    |
| 49 |                   |                     |                                                                 |       |
| 50 |                   |                     | data) for the systematic review; role of funders for the        |       |
| 51 |                   |                     |                                                                 |       |
| 52 |                   |                     | systematic review.                                              |       |
| 53 |                   |                     |                                                                 |       |
| 54 |                   |                     |                                                                 |       |
| 55 |                   |                     |                                                                 |       |
| 56 | Notes:            |                     |                                                                 |       |
| 57 |                   |                     |                                                                 |       |
| 58 |                   |                     |                                                                 |       |
| 59 |                   |                     |                                                                 |       |
| 60 |                   |                     |                                                                 |       |



- 1 • 8: Supplement 1
- 2
- 3
- 4 • 18: Supplement 3
- 5
- 6
- 7 • 19: Supplement 2 The PRISMA checklist is distributed under the terms of the Creative Commons
- 8 Attribution License CC-BY. This checklist was completed on 26. August 2019 using
- 9 <https://www.goodreports.org/>, a tool made by the [EQUATOR Network](#) in collaboration with
- 10
- 11 [Penelope.ai](#)
- 12
- 13
- 14
- 15
- 16
- 17
- 18
- 19
- 20
- 21
- 22
- 23
- 24
- 25
- 26
- 27
- 28
- 29
- 30
- 31
- 32
- 33
- 34
- 35
- 36
- 37
- 38
- 39
- 40
- 41
- 42
- 43
- 44
- 45
- 46
- 47
- 48
- 49
- 50
- 51
- 52
- 53
- 54
- 55
- 56
- 57
- 58
- 59
- 60

# BMJ Open

## A Systematic Review of Patient Reported Outcome Measures (PROMs) in Cystic Fibrosis

|                                 |                                                                                                                                                                                                                                                                               |
|---------------------------------|-------------------------------------------------------------------------------------------------------------------------------------------------------------------------------------------------------------------------------------------------------------------------------|
| Journal:                        | <i>BMJ Open</i>                                                                                                                                                                                                                                                               |
| Manuscript ID                   | bmjopen-2019-033867.R1                                                                                                                                                                                                                                                        |
| Article Type:                   | Original research                                                                                                                                                                                                                                                             |
| Date Submitted by the Author:   | 03-Apr-2020                                                                                                                                                                                                                                                                   |
| Complete List of Authors:       | Ratnayake, Irushi; Monash University, Department of Epidemiology and Preventive Medicine<br>Ahern, Susannah; Monash University Department of Epidemiology and Preventive Medicine,<br>Ruseckaite, Rasa; Monash University, Department of Epidemiology and Preventive Medicine |
| <b>Primary Subject Heading</b>: | Respiratory medicine                                                                                                                                                                                                                                                          |
| Secondary Subject Heading:      | Epidemiology                                                                                                                                                                                                                                                                  |
| Keywords:                       | PUBLIC HEALTH, Cystic fibrosis < THORACIC MEDICINE, MENTAL HEALTH                                                                                                                                                                                                             |
|                                 |                                                                                                                                                                                                                                                                               |

SCHOLARONE™  
Manuscripts



I, the Submitting Author has the right to grant and does grant on behalf of all authors of the Work (as defined in the below author licence), an exclusive licence and/or a non-exclusive licence for contributions from authors who are: i) UK Crown employees; ii) where BMJ has agreed a CC-BY licence shall apply, and/or iii) in accordance with the terms applicable for US Federal Government officers or employees acting as part of their official duties; on a worldwide, perpetual, irrevocable, royalty-free basis to BMJ Publishing Group Ltd ("BMJ") its licensees and where the relevant Journal is co-owned by BMJ to the co-owners of the Journal, to publish the Work in this journal and any other BMJ products and to exploit all rights, as set out in our [licence](#).

The Submitting Author accepts and understands that any supply made under these terms is made by BMJ to the Submitting Author unless you are acting as an employee on behalf of your employer or a postgraduate student of an affiliated institution which is paying any applicable article publishing charge ("APC") for Open Access articles. Where the Submitting Author wishes to make the Work available on an Open Access basis (and intends to pay the relevant APC), the terms of reuse of such Open Access shall be governed by a Creative Commons licence – details of these licences and which [Creative Commons](#) licence will apply to this Work are set out in our licence referred to above.

Other than as permitted in any relevant BMJ Author's Self Archiving Policies, I confirm this Work has not been accepted for publication elsewhere, is not being considered for publication elsewhere and does not duplicate material already published. I confirm all authors consent to publication of this Work and authorise the granting of this licence.

1  
2  
3 **Title:** A Systematic Review of Patient Reported Outcome Measures (PROMs) in Cystic  
4 Fibrosis

5  
6 **Authors:** Irushi Ratnayake<sup>1</sup>, Susannah Ahern<sup>1</sup> PhD, Rasa Ruseckaite<sup>1</sup> PhD  
7

8  
9 **Author Affiliations:**

10  
11 <sup>1</sup>Department of Epidemiology and Preventive Medicine, Monash University, Melbourne,  
12  
13 Australia  
14

15  
16  
17 Corresponding author:

18 Rasa Ruseckaite

19  
20 Department of Epidemiology and Preventive Medicine, Monash University

21  
22 Address: 553 St Kilda Rd, Melbourne, VIC 3004, Australia

23  
24 Email: rasa.ruseckaite@monash.edu

25  
26 Telephone: +61 3 9903 0437  
27  
28  
29

30  
31 Word Count: Text 4391; Abstract 276

32  
33 Keywords: patient reported outcome measure, PROM, health-related quality of life, cystic  
34  
35 fibrosis  
36  
37  
38  
39  
40  
41  
42  
43  
44  
45  
46  
47  
48  
49  
50  
51  
52  
53  
54  
55  
56  
57  
58  
59  
60

## ABSTRACT

**Background:** To determine Patient Reported Outcome Measures (PROMs) which may be suitable for incorporation into the Australian Cystic Fibrosis Data Registry by identifying PROMs administered in adult and paediatric cystic fibrosis populations in the last decade.

**Methods:** We searched MEDLINE, EMBASE, Scopus, CINAHL, PsycINFO and Cochrane Library databases for studies published between January 2009 and February 2019 describing the use of PROMs to measure HRQOL in adult and paediatric patients with CF. Validation studies, observational studies and qualitative studies were included. The search was conducted on 13 February 2019. The COnsensus-based Standards for the selection of health Measurement INstruments (COSMIN) risk of bias checklist was used to assess the methodological quality of included studies.

**Results:** Twenty-seven different PROMs were identified. The most commonly used PROMs were designed specifically for CF. Equal numbers of studies were conducted on adult (32%, n=31), paediatric (35%, n=34) and both (27%, n=26) populations. No PROMs were used within a clinical registry setting previously. The two most widely used PROMs, the Cystic Fibrosis Questionnaire-Revised (CFQ-R) and the Cystic Fibrosis Quality of Life Questionnaire (CFQoL) demonstrated good psychometric properties and acceptability in English-speaking populations.

**Discussion:** We found that although PROMs are widely used in CF, there is a lack of reporting on the efficacy of methods and timepoints of administration. We identified the CFQ-R and CFQoL as most suitable for incorporation in the ACFDR as they captured significant effects of CF on HRQOL and were reliable and valid in CF populations. These PROMs will be used in a further qualitative study assessing CF patients' and clinicians' perspectives toward the acceptability and feasibility of incorporating a PROM in the ACFDR.

**PROSPERO registration:** CRD42019126931

## STRENGTHS AND LIMITATIONS OF THE STUDY

- Per our knowledge this is the first systematic review evaluating PROMs in adult and paediatric CF populations.
- This review involves a rigorous and extensive search of medical databases using clearly defined inclusion criteria and distinctly outlines how items will be selected and abstracted.
- The study assesses the most relevant and acceptable PROM for the context of a CF clinical registry.
- A limitation of this study is that the search was not conducted outside of medical databases, therefore may not capture studies examining PROM use in CF that are not published in peer reviewed journals.

## INTRODUCTION

Cystic Fibrosis (CF) has undergone significant changes in the last few decades. In the mid-1900s, the majority of CF patients did not survive beyond infancy. Now, over half of patients are adults<sup>1</sup> and life expectancy exceeds 40 in most developed countries.<sup>1</sup> The changing demographics of CF has led to new challenges in both disease management and clinical research. Treatment burden has increased<sup>2</sup> such that treatments currently require two to four hours a day.<sup>3</sup> The growing adult population encounters more difficulties balancing symptom and treatment burden of the disease with work, education or family demands.<sup>4, 5</sup> Therefore, there is an increasing requirement to examine and manage psychosocial impacts of CF.<sup>3</sup> Another challenge is posed by the relative healthiness of the modern CF population resulting in traditional endpoints in clinical trials, such as forced expiratory volume in one second (FEV1) and frequency of pulmonary exacerbations, having reduced sensitivity.<sup>6</sup>

A possible solution to these challenges is to monitor and collect data on health-related quality of life (HRQOL).<sup>7</sup> HRQOL is “an individual’s perception of their position in life in the context of the culture and value systems in which they live and in relation to their goals, expectations, standards and concerns”.<sup>8</sup> It encompasses physical health, social networks and relationships, psychological health, and functional capacity.<sup>8</sup> As HRQOL is subjective, it can be described using Patient-Reported Outcome Measures (PROMs).<sup>9</sup> PROMs are standardised sets of questions completed by patients without clinician interpretation.<sup>9</sup> PROMs have been used in a range of settings, from enhancing clinician-patient interaction to supporting health policy creation and economic analysis.<sup>10</sup> They are widely used in research; in observational studies to describe the impact of a disease on daily functioning, as tools for cost analysis of medical interventions<sup>2</sup> and the FDA have recommended HRQOL measures be used as outcomes in clinical trials.<sup>5</sup>

### **Australian Cystic Fibrosis Data Registry**

The Australian Cystic Fibrosis Data Registry (ACFDR) has been collecting data on Australian adults and children diagnosed with CF since 1998. In 2017 the ACFDR held records of 3151 patients,<sup>11</sup> estimated to be over 90% of Australia’s CF population.<sup>4</sup> The registry collects information on patients’ demographics, social functioning, physical health, treatments and mortality. In addition to increasing awareness about Australia’s CF population, the ACFDR has supported interventional and observational research and economic analysis.<sup>12</sup> The ACFDR enables national and international benchmarking<sup>12</sup> which has transformed models of care worldwide.<sup>4</sup>

PROMs evaluating HRQOL have been incorporated in Australian and international clinical registries.<sup>13-15</sup> In the US, PROM information is used to support observational studies which assess the association between patient demographics, disease burden and HRQOL.<sup>16</sup> In

1  
2  
3 Sweden, the national rheumatology registry enters its PROM data into a database to which  
4 patients and clinicians have access, so that patients are empowered to monitor their HRQOL  
5 and shared decision making is enhanced.<sup>15</sup> In Australia, PROMs evaluating HRQOL are  
6 currently incorporated in a number of state and national registries.<sup>17</sup> Information is used to  
7 monitor long term quality of life outcomes of treatments and complications,<sup>17</sup> to enable  
8 clinicians and health services to benchmark outcomes and ensure patient safety,<sup>14</sup> and to  
9 influence changes in clinical practice.<sup>14</sup>  
10  
11  
12  
13

14  
15 Integration of a PROM evaluating HRQOL into the ACFDR will reinforce the patient voice in  
16 data collection. PROMs in the ACFDR have the potential to be used for periodic review of  
17 aggregate HRQOL over time; to inform quality improvement for health services and  
18 clinicians; and for outcome measurement in registry-related clinical trials.<sup>10</sup> In order to fulfil  
19 these functions, any PROM selected for integration must be comprehensive in capturing all  
20 effects of CF on HRQOL. It must also have demonstrated good psychometric properties, be  
21 feasible to incorporate in ACFDR data collection and be acceptable to patients.  
22  
23  
24  
25

## 26 **AIMS**

27  
28 The primary aim of this review was to identify PROMs used in adult and paediatric CF  
29 populations, to determine any that may be suitable for incorporation into the ACFDR.  
30

31 Secondary aims were to examine:  
32

- 33 • Contexts in which PROMs are currently being used in CF (e.g. study design, setting);
- 34 • Methods of administration of PROMs (e.g. paper survey, electronic, interview, use of  
35 proxy-respondents);
- 36 • Assessed or stated psychometric properties of PROMs (e.g. reliability, validity,  
37 responsiveness);
- 38 • Acceptability of PROMs in adult and paediatric patient population.  
39  
40  
41  
42  
43  
44  
45  
46  
47  
48  
49  
50  
51  
52  
53  
54  
55  
56  
57  
58  
59  
60



## METHODS

A protocol for this systematic review was created following the Preferred Reporting Items for Systematic review and Meta-Analysis (PRISMA) guidelines.<sup>18</sup> The protocol was registered with PROSPERO (Registration number is CRD42019126931).

Eligibility and inclusion criteria are described in Table 1.

Table 1: Population, Intervention, Comparison, Outcome Research Strategy for Systematic Review

| PICO                | Description                                                                                                                                                                                                                                                                                                                                                                                                        |
|---------------------|--------------------------------------------------------------------------------------------------------------------------------------------------------------------------------------------------------------------------------------------------------------------------------------------------------------------------------------------------------------------------------------------------------------------|
| <b>Population</b>   | Adults and children with diagnosed CF                                                                                                                                                                                                                                                                                                                                                                              |
| <b>Intervention</b> | Articles describing PROMs used to assess HRQOL in CF.<br><br>Articles describing both generic and disease-specific measures will be included.                                                                                                                                                                                                                                                                      |
| <b>Comparison</b>   | Studies without a comparator will be considered for inclusion                                                                                                                                                                                                                                                                                                                                                      |
| <b>Outcome</b>      | Primary outcome measure is: <ul style="list-style-type: none"> <li>Identifying PROMs in CF population</li> </ul> Secondary outcome measures are: <ul style="list-style-type: none"> <li>Contexts in which PROMs have previously been used</li> <li>Administration methods of PROMs</li> <li>Assessed or stated validity and reliability of PROMs</li> <li>Acceptability of PROMs for patient population</li> </ul> |

### Inclusion criteria

Articles were included according to the following criteria:

- Study participants of all ages with a prior diagnosis of CF;
- Inpatients and outpatients;
- Study designs including quantitative (e.g. cohort, longitudinal, prospective, retrospective and validation) and qualitative studies (e.g. ethnography and case report)

## Exclusion criteria

Articles were excluded according to the following criteria:

- Published before January 2009;
- No article available in the English language;
- Conference abstracts;
- Editorials and reviews;
- Randomised Control Trials, as the same PROM was used for all and they provided limited additional information on secondary outcomes.

Reviewers searched MEDLINE, EMBASE, Scopus, CINAHL, PsycINFO and Cochrane Library databases on 13 February 2019. The search strategy was adapted to each database and included keywords: “*patient reported outcome*” OR “*patient reported outcome measure*” OR “*self-report*” OR “*questionnaire*” OR “*scale*” OR “*perception*” OR “*quality of life*” OR “*QOL*” AND “*cystic fibrosis*.” The search was restricted to English language, humans and last 10 years. Supplementary File 1 describes the search strategy for each database.

Initial screening involved a reviewer reading titles and abstracts of all studies identified by the search. Any studies that clearly did not meet the inclusion criteria were removed. Full texts of remaining studies were then read one author. Another author reviewed each stage of study selection. The numbers of studies at each stage of the search were recorded using the PRISMA flow diagram.

A data extraction form was constructed to summarise selected studies in line with the outcomes of the systematic review. Information extracted included: type of study, mean age of participants, setting PROM(s) administered, method of administration, time points administered PROM(s) used, type of PROM(s), psychometric properties of PROM(s) and acceptability of PROM(s) to patients.

The COnsensus-based Standards for the selection of health Measurement INstruments (COSMIN) risk of bias checklist was used to assess methodological quality of included studies. This tool was chosen as it was specifically created for studies using PROMs.<sup>19</sup> One reviewer appraised studies using the tool. Items were rated on a four point scale denoted as very good, adequate, doubtful or inadequate. Results were summarised into a table presenting the lowest score for each property.<sup>19</sup>

A descriptive synthesis of results was undertaken, organised thematically by type of PROM and assessing context, administration, acceptability and reliability of each measure. A meta-analysis was not performed as included studies assess different outcomes.

## RESULTS

### Search results

The search yielded 5671 results. The numbers at each stage are summarised in Figure 1. A final number of 91 studies were included in the review. The data extraction table is presented in Supplementary File 3.

[Figure 1]

### Contexts in which PROMs were used

A large proportion (80%, n=73) of studies identified were of observational study design. Validation studies were the next most frequent, making up 15% (n=14) of all studies. The search also identified two non-randomised control trials, two qualitative studies and one study describing development of a PROM. Similar numbers of studies were conducted on adults (34%, n=31), children (37%, n=34) or both (29%, n=26) age groups.

Most studies recruited patients from a CF outpatient clinic (61%, n=56). Other studies used patient populations from: RCT data (8%, n=7), inpatients (7%, n=6), longitudinal cohort study data (5%, n=5) and national databases (4%, n=4). No study was conducted using clinical registry data. In 48% (n=44) of studies, PROM instruments were used in cross-sectional observational studies to evaluate whether there was an association between HRQOL and physical factors (e.g. sleep, physical fitness), psychological factors (e.g. self-esteem, illness perception), social factors (e.g. stigma, employment status) or demographic factors (e.g. age, gender). Other reasons for utilising PROMs were to assess HRQOL in a population (18%, n=16) or validate PROMs (18%, n=16).

### Mode and method of administration

PROMs were commonly self-reported on paper in clinic for 19% (n=17) of studies. Many studies (14%, n=13) used multiple methods of administration e.g. paper and interview. Less commonly, data were collected using electronic methods for 8% (n=7) of studies. Many studies (55%, n=50) did not state mode or method of PROM administration.

For 43 studies conducted on young children below 13 years of age, the most common method of administration for 33% (n=14) was self-report using instruments specially designed for use in young children. Interviews were used in 28% (n=12) of studies and parents were used as proxy respondents in 23% (n=10) of studies completed on paediatric populations. When studies assessed the degree of agreement between child self-report and parent-proxies, they found variable results. While some studies found a high level of agreement in parent-child reports,<sup>20, 21</sup> others found that parents were better able to report HRQOL in observable domains, such as physical symptoms.<sup>22-25</sup> Two studies<sup>26, 27</sup> noted that parent-child agreement was better for younger children than older.

PROMs were administered once at the beginning of the study for the majority of studies (55%, n=50), which reflects the large proportion of cross-sectional studies. Several PROMs were administered twice (12%, n=11) and 15 (16%) studies applied PROMs longitudinally, between five to twelve times. The frequency of longitudinal administration varied from fortnightly<sup>28</sup> to 2 yearly.<sup>29</sup> Studies did not discuss the benefits of administering PROMs at their chosen frequencies. Dill et al.<sup>30</sup> applied the Cystic Fibrosis Questionnaire Revised (CFQ-R) every 3 months and found individual variation in each domain. This was not seen in a study that administered the EQ-5D every 8 weeks.<sup>31</sup> Abbott et al.<sup>32</sup> applied the Cystic Fibrosis Quality of Life Questionnaire (CFQoL) to the same patients over 12 years and observed a steady decrease of overall CFQoL score at 1% per year, which correlated with the decrease in FEV1%.

### **Acceptability**

Two studies assessing patient views towards PROMs found that parent caregivers were satisfied with the questionnaires.<sup>33, 34</sup> Salek et al.<sup>3</sup> observed that 76% of CF patients in their study would be willing to complete the CFQoL at every clinic visit. Overall, as most studies did not report the patient burden of PROMs to their patient populations, this review has found limited information on acceptability of PROMs for patients.

### **PROMs identified**

This review identified 27 different PROMs evaluating HRQOL. These were CF-specific, respiratory-specific, mental health-specific or generic. Some studies (25%, n=23) used two or more different PROMs. CF-Specific PROMs were used more commonly than other types. The most common instrument used was CFQ-R, used in 54% (n=49) of studies.

#### *CF-specific instruments*

Table 2 summarises the characteristics of CF-specific PROMs identified in this review.

Table 2: CF-specific PROMs

| PROM                                                                      | Studies Included | Year developed | Target population                                                                                          | Languages*                                                                                               | Number of items and domains                                                                                                                                                                                                                                                                     | Psychometric properties                                                                                                                                                                                                                                                                               |
|---------------------------------------------------------------------------|------------------|----------------|------------------------------------------------------------------------------------------------------------|----------------------------------------------------------------------------------------------------------|-------------------------------------------------------------------------------------------------------------------------------------------------------------------------------------------------------------------------------------------------------------------------------------------------|-------------------------------------------------------------------------------------------------------------------------------------------------------------------------------------------------------------------------------------------------------------------------------------------------------|
| Cystic Fibrosis Questionnaire - Revised <sup>28, 35-41</sup>              | 49               | 2003           | Teen/ adult (14+ years)<br>Adolescent (12-13 years)<br>Child (6-11 years)<br>Parent (Proxy for 6-13 years) | English<br>Polish<br>German<br>Hungarian<br>Dutch<br>Hindi<br>Portugese<br>Spanish<br>Swedish<br>Turkish | Number of Items:<br>Adult: 50<br>Adolescent: 35<br>Child: 35<br>Parent: 44<br><br>Domains: Physical, vitality, emotion, social, role/ school, body image, treatment burden, health perceptions, weight, respiratory, digestion                                                                  | Reliability: $\alpha > 0.7$ except treatment burden and social functioning domains in some studies<br><br>Test retest reliability** $> 0.6$<br><br>Validity: Known groups validity with FEV1, age and BMI.<br><br>Ceiling effects: Eating disturbances (46.4%), Body Image (39.6%), Digestion (37.2%) |
| Cystic Fibrosis Quality of Life Questionnaire <sup>3, 29, 32, 42-49</sup> | 14               | 2000           | Adult (14+ years)                                                                                          | English<br>Polish<br>Greek<br>Portugese                                                                  | Adult: 52<br><br>Domains: Physical, social, treatment, emotional, relationships, career, future, chest symptoms, body image                                                                                                                                                                     | Reliability: $\alpha: 0.72 - 0.95$<br><br>Test retest reliability $> 0.7$<br><br>Validity: All domains correlated with FEV2, sensitive to change over time                                                                                                                                            |
| Cystic Fibrosis Questionnaire <sup>27, 50-55</sup>                        | 7                | 1997           | Teen/ adult (14+ years)<br>Child (6-13 years)<br>Parent (Proxy for 6-13 years)                             | English<br>German<br>Dutch<br>Portugese                                                                  | Number of Items:<br>Adult: 48<br>Adolescent:<br>Child: 35<br>Parent: 44<br><br>Domains: Physical functioning, vitality, emotional state, social limitations, role/ school, body image, treatment constraints, embarrassment, eating disturbances, health status, weight, respiratory, digestion | Reliability: $\alpha=0.62 - 0.93$ for most domains in adult and child questionnaires<br><br>Validity: Some domains correlated with FEV1                                                                                                                                                               |

| PROM                                                     | Studies Included | Year developed | Target population                                                                          | Languages* | Number of items and domains                                                | Psychometric properties                                                                                                                          |
|----------------------------------------------------------|------------------|----------------|--------------------------------------------------------------------------------------------|------------|----------------------------------------------------------------------------|--------------------------------------------------------------------------------------------------------------------------------------------------|
| DISABKIDS-CFM <sup>34, 56</sup>                          | 2                | 2013           | Child (8-17 years)<br>Parent (Proxy for 8-17 years)                                        | Portuguese | Number of items: 10<br>Domains: Impact, Treatment                          | Reliability: $\alpha$ : 0.71 - 0.76<br>Validity: Good convergent and divergent validity assessed by MTMM<br>Ceiling effects: 27.5% impact domain |
| CF Symptom Diary <sup>57</sup>                           | 1                | 2009           | All ages                                                                                   | English    | Number of items: 16<br>Domains: Symptom, emotional impact, activity impact | Not reported                                                                                                                                     |
| Cystic Fibrosis Respiratory Symptom Diary <sup>26</sup>  | 1                | 2018           | CFRSD <sub>0-6</sub> (Proxy for 0-6 years)<br>CFRSD <sub>7-11</sub> (Proxy for 7-11 years) | English    | Number of items: 17<br>Domains: Respiratory signs, CF-related impacts      | Validity: Discriminates between sick and well CF patients                                                                                        |
| Res-CF <sup>58</sup>                                     | 1                | 2017           | Adult (18+)                                                                                | English    | Number of items: 4 (VAS)                                                   | Test retest reliability** > 0.7 for 3/4 items<br>Validity: Correlates with CFQ-R and responsive to changes in health                             |
| Cystic Fibrosis Symptom Progression Survey <sup>33</sup> | 1                | 2015           | Child (0-15 years, self-report and proxy)                                                  | Arabic     | Number of items: 10                                                        | Reliability: $\alpha$ = 0.76<br>Validity: Content validity demonstrated using factor analysis                                                    |

\* Languages included in this review

\*\*Test-retest reliability measured by intraclass correlation coefficient

MTMM: Multitrait multimethod matrix

1  
2  
3 CFQ-R was the most commonly used PROM in this review. It is widely used as it includes  
4 scales for children (6-11 years), adolescents (12-13 years), teens/adults (14+ years) and  
5 parents. This PROM is a revised version of the original Cystic Fibrosis Questionnaire  
6 (CFQ).<sup>38</sup> The CFQ was developed in France in 1997<sup>59</sup> and minor revisions were performed  
7 by Wenniger et al.<sup>60</sup> in 2003 due to inadequate psychometric properties found during  
8 validation of the German translation. The CFQ-R has been translated into 36 different  
9 languages.<sup>2</sup> Gancz et al.<sup>61</sup> reported that the CFQ-R was generally completed in 10-30  
10 minutes.  
11  
12

13  
14  
15  
16 Studies demonstrated generally good psychometric properties of the CFQ-R. When  
17 considering only the scales in English, internal consistency evaluated by Cronbach alpha  
18 ranged from 0.62 – 0.93<sup>36-38, 40</sup> for adult and child questionnaires and 0.55 – 0.75 for parent  
19 questionnaires.<sup>62</sup> Studies reported that the treatment burden, body image and school  
20 functioning domains were exceptions.<sup>25, 36, 38, 40</sup> Validity was demonstrated by the association  
21 between several CFQ-R domains and clinical parameters, in particular FEV1<sup>30, 38, 63-67</sup> and  
22 BMI (Body Mass Index).<sup>66, 67</sup> Longitudinal studies have shown that CFQ-R is sensitive to  
23 changes to HRQOL with antibiotic treatment<sup>35</sup> or over the course of a year.<sup>68</sup> Authors  
24 suggested it could predict survival<sup>42</sup> and be a determinant for lung transplantation.<sup>69</sup> Content  
25 validity was acceptable.<sup>25, 70</sup>  
26  
27

28  
29  
30  
31  
32 The CFQoL was the second most commonly used PROM. It has only been developed for  
33 adult populations. Salek et al.<sup>3</sup> found an average nine minute completion time and that the  
34 majority of patients found the instrument acceptable for completion in every clinic  
35 appointment. Studies identified in our search described robust psychometric properties of  
36 the CFQoL. Reliability measured by Cronbach alpha ranged from 0.72 – 0.95<sup>32, 45</sup> for all  
37 domains. It was correlated with generic measures, Short Form Questionnaire (SF36) and UK  
38 Sickness Impact Profile (UKSIP),<sup>3, 32</sup> and Schwachman-Kulczycki score, a clinician reported  
39 outcome measure.<sup>43</sup> Discriminant validity has been demonstrated by significantly worse  
40 CFQoL scores in CF patients than in controls.<sup>47</sup> Studies demonstrated correlation between  
41 CFQoL domains and FEV1,<sup>3, 32, 46</sup> however one study did not find a significant correlation.<sup>71</sup>  
42  
43

44  
45  
46  
47  
48  
49 Other CF specific PROMs identified included the CFQ, which was the first CF-specific  
50 PROM developed and has child, teen/adult and parent versions.<sup>38</sup> Studies demonstrated  
51 good internal consistency of most domains,<sup>55,27</sup> with the exception of treatment burden  
52 domain in all versions, social functioning domain in child and adult, and eating and digestion  
53 domains in adult and parent versions.<sup>27</sup> The DISABKIDS- CF Module, which was developed  
54 for children was used in two studies conducted in Brazil. Good internal consistency was  
55 demonstrated<sup>34, 56</sup> but one study found a ceiling effect and low test-retest reliability.<sup>56</sup> Several  
56 CF-specific PROMs were developed or initially validated during the last decade. These  
57  
58  
59  
60

1  
2  
3 included the CF Respiratory Symptom Diary (CFRSD),<sup>26</sup> CF Symptom Progression Survey  
4 (CF-SPS),<sup>33</sup> CF Symptom Diary<sup>57</sup> and the Respiratory Symptoms in CF (ReS-CF).<sup>58</sup>  
5  
6

### 7 *Respiratory specific PROMs*

8 Several HRQOL PROMs developed for chronic respiratory conditions were used in CF.  
9 These included the Leicester Cough Questionnaire (LCQ),<sup>58, 72</sup> St George's Respiratory  
10 Questionnaire (SGRQ),<sup>73, 74</sup> the Sinus and Nasal Quality of Life Survey (SN-5),<sup>75, 76</sup>, the Sino-  
11 Nasal Outcome Test (SNOT-22)<sup>77</sup> and the Liverpool Respiratory Symptom Questionnaire  
12 (LRSQ).<sup>6</sup> The SN-5 and SNOT-22 exclusively assess sinus symptoms.<sup>75-77</sup> The other  
13 respiratory PROMs, LCQ, SGRQ and LRSQ were originally piloted in patients with asthma<sup>78</sup>  
14 or chronic cough.<sup>79</sup> The LCQ, SGRQ and LRSS demonstrated acceptable reliability<sup>6, 58, 74</sup> and  
15 were found to correlate with CFQ-R domains<sup>58, 72</sup> and lung function tests.<sup>6, 73</sup> However, two  
16 studies found ceiling effects with the LCQ.<sup>58, 72</sup> Reliability of the SN-5 and SNOT-22 were not  
17 assessed, but SNOT-22 demonstrated floor effects<sup>77</sup> and the validity of SN-5 has not been  
18 assessed in CF.<sup>76</sup>  
19  
20  
21  
22  
23  
24  
25

### 26 *Mental health specific PROMs*

27 The most common mental health specific PROM identified was the Hospital Anxiety  
28 Depression Scale (HADS), which was used in eight observational studies in Europe and US.  
29 The instrument was reported to take 15 – 20 minutes to complete.<sup>48</sup> Studies found good  
30 reliability assessed by Cronbach alpha.<sup>36, 80</sup> Yohannes et al.<sup>48</sup> found good test-retest  
31 reliability and correlation with CFQoL. The HADS was used to show increased anxiety and  
32 depression in CF patients compared to the non-CF population.<sup>81</sup> Other HRQOL surveys  
33 focused on mental health identified were the Patient Health Questionnaire (PHQ-9), General  
34 Health Questionnaire (GHQ) and General Anxiety Disorder (GAD-7). Each was used in one  
35 study and found to have acceptable reliability,<sup>74, 82</sup> however validity was not assessed.  
36  
37  
38  
39  
40  
41  
42

### 43 *Generic Instruments*

44 Table 3 describes characteristics of generic instruments included in this study.  
45  
46  
47  
48  
49  
50  
51  
52  
53  
54  
55  
56  
57  
58  
59  
60



Table 3: Generic PROMs

| PROM                                                               | Number of Studies included | Year developed | Target population                                                               | Languages*                                                                             | Number of items and domains                                                                                                                                                                                               | Psychometric properties                                                                                          |
|--------------------------------------------------------------------|----------------------------|----------------|---------------------------------------------------------------------------------|----------------------------------------------------------------------------------------|---------------------------------------------------------------------------------------------------------------------------------------------------------------------------------------------------------------------------|------------------------------------------------------------------------------------------------------------------|
| EQ-5D <sup>21, 31, 52, 63, 83-85</sup>                             | 7                          | 1990           | EQ-5D-3L (16+)<br>EQ-5D-5L (16+)<br>EQ-5D-Y (8-15 years, self report and proxy) | English<br>French<br>German<br>Hungarian<br>Italian<br>Spanish<br>Swedish<br>Bulgarian | Number of items: 5<br><br>Domains: mobility, self-care, usual activities, pain/ discomfort, anxiety/depression                                                                                                            | Validity: Discriminates between CF and non-CF population<br><br>Ceiling effects: 44 - 67%                        |
| Paediatric Quality of Life Inventory <sup>20, 22, 23, 35, 86</sup> | 5                          | 1998           | Child (8-12 years, self report and proxy)                                       | English<br>Hungarian<br>Persian                                                        | Number of items: 23<br><br>Domains: Physical, Emotional, School, Social                                                                                                                                                   | Reliability: $\alpha = 0.68 - 0.93$<br><br>Validity: Discriminates between CF and asthma or non-CF population    |
| Short Form-36 <sup>42, 73, 74, 87</sup>                            | 4                          | 1990           | Adult (14+)                                                                     | English<br>German<br>Italian<br>Polish                                                 | Number of items: 36<br><br>Domains: Physical functioning, role-physical, role - emotional, bodily pain, general health, vitality, social functioning, mental health                                                       | Known groups validity with age and time after lung transplant<br><br>Ceiling effects up to 67.7% in some domains |
| UK Sickness Impact Profile <sup>3</sup>                            | 1                          | 1975           | Adult (18+)                                                                     | English                                                                                | Number of items: 136<br><br>Domains: Sleep and rest, eating, work, home management, recreation and pastimes, ambulation, mobility, body care, social interaction, alertness behaviour, emotional behaviour, communication | Reliability: $\alpha = 0.87 - 0.9$<br>Test retest reliability 0.57 - 0.84<br><br>Convergent validity with CFQoL  |

| PROM                                                          | Number of Studies included | Year developed | Target population  | Languages* | Number of items and domains                                                                                                           | Psychometric properties        |
|---------------------------------------------------------------|----------------------------|----------------|--------------------|------------|---------------------------------------------------------------------------------------------------------------------------------------|--------------------------------|
| World Health Organisation Quality of Life scale <sup>43</sup> | 1                          | 1996           | Adult (16+)        | Portugese  | Number of items: 26<br>Domains: Physical health, psychological, social relationships, environment                                     | Not reported                   |
| Single Item Scale <sup>48</sup>                               | 1                          | 2011           | Adult (18+)        | English    | Number of items: 1                                                                                                                    | Test retest reliability 0.78   |
| Quality of Life Profile for the Chronically Ill <sup>73</sup> | 1                          | 2000           | Adult (18+)        | German     | Number of items: 40<br>Domains: Physical capacity, psychological capacity, social capacity, psychological wellbeing, social wellbeing | Not reported                   |
| Core Outcome Measures <sup>37</sup>                           | 1                          | 1993           | Adult (16+)        | English    | Number of items: 34<br>Domains: Wellbeing, symptoms, functioning, risk                                                                | Convergent validity with CFQ-R |
| KINDL <sup>70</sup>                                           | 1                          | 1994           | Child (3-17 years) | Turkish    | Number of items: 40<br>Domains: psychosocial wellbeing, physical state, social relationships, functional capacity(76)                 | Convergent validity with CFQ-R |

\*Languages included in this review \*\*Test-retest reliability measured by intraclass correlation coefficient

1  
2  
3 The most common generic instrument was the EQ-5D questionnaire, which was developed  
4 to enable economic evaluations based on HRQOL scores. It has five dimensions and includes  
5 EQ-5D-3L version which has three response options, EQ-5D-5L version which has five  
6 response options, and EQ-5D-Y which has been designed for children and adolescents. All  
7 three versions of the PROM were utilised in this review<sup>21, 31, 52, 63, 83-85</sup> This review found EQ-  
8 5D-3L was reliable<sup>63</sup> and correlated with CFQ-R.<sup>84</sup> EQ-5D-5L distinguished HRQoL  
9 differences in CF and non-CF populations<sup>83</sup> and was sensitive to change during pulmonary  
10 exacerbation.<sup>84</sup> However, studies found a large proportion of patients reporting no problems  
11 with EQ-5D-3L and EQ-5D-Y,<sup>31, 52</sup> demonstrating that the PROMs may not be sensitive in  
12 collecting HRQOL data from CF patients.  
13

14  
15 A similar finding was observed in the Short Form Survey (SF-36), which was used in four  
16 European studies on adult populations.<sup>42, 47, 73, 74</sup> The instrument demonstrated robust  
17 psychometric properties; Cronbach alpha of 0.95<sup>74</sup> and discriminated between CF and non-  
18 CF populations.<sup>47, 74</sup> However Abbott et al.<sup>42</sup> found a high proportion of participants reporting  
19 no problems and that the instrument was less sensitive to clinical deterioration than the  
20 CFQoL.  
21

22  
23 The Paediatric Quality of Life Inventory (PedsQL) is a generic HRQOL instrument developed  
24 for children with paediatric cancers.<sup>88</sup> The PedsQL demonstrated good internal  
25 consistency,<sup>20</sup> discriminant validity comparing asthma and CF and correlated with BMI.<sup>35</sup>  
26 Other generic HRQOL PROMs described in adult populations were the World Health  
27 Organisation Quality Of Life scale (WHOQOL-BREF),<sup>43</sup> Core Outcome Measures tool  
28 (CORE-OM),<sup>37</sup> United Kingdom Sickness Impact Profile (UKSIP),<sup>3</sup> KINDL and the Quality of  
29 Life Profile for the Chronically Ill (PLC).<sup>73</sup> These instruments were each used in one  
30 observational study. Psychometric properties were not evaluated in included studies.  
31

### 32 **Risk of Bias**

33  
34 The COSMIN Risk of Bias checklist is designed to critically appraise studies evaluating the  
35 reliability or validity of PROMs. A number of studies in this review did not validate  
36 instruments for their study population and relied on previous reliability and validity statistics  
37 for the PROM used. Therefore, these studies were not critically appraised. The results of  
38 critical appraisal are summarised in Supplementary File 2.  
39

40  
41 Critically appraising articles using the COSMIN checklist enables reviewers to discern  
42 whether psychometric properties have been evaluated using appropriate methodology. From  
43 this, reviewers can determine whether the information reported on psychometric properties  
44 of PROMs is trustworthy. For example, the second most commonly evaluated property  
45 'Internal Consistency' frequently received optimal scores, demonstrating that researchers  
46  
47  
48  
49  
50  
51  
52  
53  
54  
55  
56  
57  
58  
59  
60

1  
2  
3 were in line with COSMIN recommendations and that 'Internal Consistency' reported is  
4 generally reliable. However, the most commonly reported property 'Hypothesis Testing for  
5 Construct Validity' received variable scores, demonstrating a lack of reliability in interpreting  
6 this statistic.  
7  
8

## 9 10 **DISCUSSION**

### 11 **Contexts in which PROMs were used**

12 This review identified that PROMs are used in a variety of settings in CF. PROMs were most  
13 commonly used in observational studies, where they assessed the impact of physical,  
14 psychological, social or demographic variables on HRQOL. This review did not find studies  
15 describing implementation of a PROM in a clinical registry or which used clinical registry  
16 data.  
17

18 Some studies were developing PROMs or undertaking validation of new PROMs. This may  
19 suggest that existing PROMs are not meeting researchers' requirements. Limitations of  
20 existing PROMs may include the length of commonly used CF-specific PROMs, which could  
21 reduce patient compliance and increase data entry burden. Newly developed CF-specific  
22 PROMs identified in this study were substantially shorter,<sup>33, 49, 58</sup> demonstrating that  
23 researchers require less burdensome CF-specific PROMs. Another limitation may be  
24 inadequacy of paediatric measures as currently, no validated PROMs exists to measure data  
25 in 0-6 year olds.<sup>26</sup> This review identified researchers validating or developing PROMs for  
26 younger patient populations.<sup>26, 33, 56</sup>  
27

### 28 **Mode and methods of administration**

29 The mode of administration of the selected PROM will be a major determinant of patient  
30 adherence and completion rates<sup>9</sup>. Studies in this review used paper based methods most  
31 frequently. However, electronic or online administration is reported to have higher patient  
32 adherence,<sup>9</sup> avoid the need for manual data entry and be more cost effective in the long  
33 term than paper methods.<sup>8<sup>9</sup></sup>  
34

35 For paediatric populations, the most common method of administration was self-reporting,  
36 using instruments specially designed for use in children. Proxy reporting was uncommon and  
37 studies investigating the consistency of parent and child results found that it was better for  
38 observable symptoms<sup>22-25</sup> and younger children.<sup>26, 27</sup> Edwards et al.<sup>26</sup> hypothesised this  
39 finding was because parents are more involved in care for younger children and therefore  
40 have a better understanding of their HRQOL.  
41

42 This review demonstrated the advantages of longitudinal PROM collection, as associations  
43 between physical and sociodemographic characteristics and quality of life were seen in  
44 studies undertaken over a decade,<sup>29, 32</sup> which weren't seen over 12 or 18 month periods.<sup>30</sup>  
45  
46  
47  
48  
49  
50  
51  
52  
53  
54  
55  
56  
57  
58  
59  
60

1  
2  
3 However, where PROMs captured longitudinally, there was a range of frequencies of  
4 administration, demonstrating a lack of consensus on the most appropriate time required  
5 between PROM administration. Studies generally did not report information on the  
6 effectiveness of the frequency of administration in demonstrating changes in HRQOL.  
7  
8 Further evaluation of the most useful and acceptable time points of administration must be  
9 conducted prior to incorporation of a PROM into the ACFDR.  
10  
11  
12

### 13 **PROMs identified**

14  
15 Our review identified that PROMs developed specifically for CF are more commonly used for  
16 CF patients than generic PROMs. Generic PROMs, which ask about health domains  
17 relevant to everyone, have the advantage of applicability across all populations.<sup>14</sup> Therefore,  
18 they were used to compare different diseases and in cost-analysis and resource allocation  
19 decisions.<sup>21, 83</sup> CF-specific PROMs include an assessment of CF symptoms that are not  
20 relevant in non-CF populations,<sup>14</sup> therefore have comparatively limited uses in health policy.  
21  
22 However, this review found that CF-specific PROMs are more responsive to changes in  
23 health<sup>9</sup> and better correlated to clinical parameters<sup>22, 90</sup> compared to generic PROMs.  
24  
25 Significant ceiling effects found using EQ-5D<sup>31</sup> or SF-36<sup>42</sup> suggest these generic instruments  
26 are not capturing problems faced by the CF population. Specific PROMs can therefore give  
27 more clinically relevant information than generic<sup>2, 9</sup> and better compare outcomes within CF  
28 populations.<sup>91</sup>  
29  
30  
31  
32  
33

34  
35 A number of symptom-specific PROMs were identified in our review that focused on  
36 respiratory symptoms or mental health. As CF affects all four domains of HRQOL, physical  
37 health, psychological health, social relationships and functional capacity, the use of these  
38 symptom-specific PROMs will not provide the comprehensive assessment of HRQOL  
39 required by the ACFDR. While it is important to assess depression and anxiety in CF,  
40 evaluating only these symptoms may give a limited understanding of the effect of CF on  
41 overall HRQOL.  
42  
43  
44  
45

### 46 **Choosing a PROM for the ACFDR**

47  
48 The ACFDR was established to facilitate varying research methodologies and impart  
49 accurate information on the current outcomes of Australia's CF population.<sup>4</sup> One of its key  
50 functions, providing feedback of outcomes for clinicians and health services, is critical for the  
51 ongoing improvement of care.<sup>92</sup> The inclusion of CF-specific domains in the chosen tool is  
52 therefore essential, as these domains will be most directly affected by changes in treatment  
53 and therefore will be the most useful information to feedback to clinicians. Similarly, CF  
54 symptom information will be relevant for pharmaceutical companies or researchers following  
55 up the long-term outcomes of treatment and complications. In addition, ensuring that PROM  
56  
57  
58  
59  
60

1  
2  
3 data captures all aspects of HRQOL will enable it to be widely used in research. Therefore, it  
4 is most appropriate to include a CF-specific PROM.  
5

6  
7 After evaluating PROMs based on the predetermined criteria for incorporation into the  
8 ACFDR; comprehensiveness, robust psychometric properties, feasibility and acceptability,  
9 the CFQ-R and CFQoL come closest to achieving this criteria. They are comprehensive as  
10 they include both general and CF-specific domains. This review establishes satisfactory  
11 psychometric properties for these two instruments.  
12  
13

14  
15 A major limitation to incorporating either PROM into the ACFDR is the length of the  
16 instruments, which may dissuade patients from participating in data collection or completing  
17 the instrument. This poses a difficulty, as a large amount of missing data may cause  
18 collection of PROM data to become ineffectual. However, if patients believe that measuring  
19 HRQOL is useful to them, they may complete the instrument regardless of its length. At the  
20 Duke Cancer Institute in US, patients in solid tumour clinics have less than 5% missing data  
21 for a survey with median completion time of 11 minutes.<sup>90</sup> Communication of the beneficial  
22 outcomes to patients, clinicians and researchers of HRQOL data collection may influence  
23 patients to regard completing the instrument as important to them.  
24  
25

26  
27 Both of the selected CF PROM tools are also the oldest specific instruments developed in  
28 CF.<sup>93, 94</sup> There is a possibility of longevity bias if these PROMs are most commonly used in  
29 CF because they are well-known, rather than superior instruments. Another concern is that  
30 as the demographics and outcomes of CF have changed considerably since these  
31 instruments were first developed, their relevance to the current population may be limited. In  
32 addition, the PROM selected for the ACFDR must also be applicable to future populations,  
33 so that registry data collection remains consistent.<sup>90</sup> However, both the CFQ-R and CFQoL  
34 demonstrated the most robust psychometric properties of all the PROMs and recent studies  
35 that used these instruments reported no requirement for modification,<sup>28, 46, 86, 95</sup> so it can be  
36 concluded they are currently relevant to the CF population.  
37  
38

### 39 40 41 42 43 44 45 46 **Limitations of the review**

47 This systematic review has a number of limitations. The lack of information on the use of  
48 PROMs in registries may be because a grey literature search was not conducted. However,  
49 it may also occur because PROMs have been incorporated in registries in CF but not  
50 reported or because no other CF registry has begun the process of incorporating PROMs.  
51 Researchers also excluded randomised controlled trials (RCTs) from this review, which  
52 limited our results on the extent of PROM use in CF research. However, this enabled a focus  
53 on observational studies, which have data collection methods more closely resembling  
54 clinical registries. Furthermore, during the initial searches for this topic, RCTs were found to  
55  
56  
57  
58  
59  
60

1  
2  
3 only use the CFQ-R and not report on administration methods, psychometric properties or  
4 patient perspectives of PROMs.  
5

6  
7 Another limitation is the lack of information identified on the views of CF patients and  
8 caregivers on the relevance of PROMs, their clarity and structure, ease of use and whether  
9 completing PROMs was emotionally burdensome. This information is important because  
10 symptoms and treatments are already emotionally and physically demanding, therefore a  
11 time-consuming and difficult questionnaire should not be imposed on patients. In addition,  
12 giving a questionnaire that is meaningful to patients and clinicians is essential to ensure  
13 compliance and guarantee complete data collection. Acceptability may be affected by  
14 multiple factors including the PROM used and its method and frequency of administration.  
15

16  
17 In order to overcome these limitations, researchers will conduct a further feasibility and  
18 acceptability study to identify patient and clinician perspectives toward incorporation of either  
19 the CFQ-R or CFQoL into the ACFDR.  
20  
21  
22  
23  
24  
25

## 26 **CONCLUSION**

27 This review aimed to identify whether existing HRQOL instruments are suitable for  
28 incorporation in the registry and to gain an understanding of the use of PROMs in CF. We  
29 found that PROMs are widely used in CF, but there is a lack of reporting on methods of  
30 administration and time points. We have identified two PROMs appropriate for ACFDR that  
31 will be used in a further qualitative study of CF patients and clinicians, to gain their  
32 perspectives on the instruments and the feasibility of incorporating a PROM into the ACFDR.  
33  
34  
35  
36

37 **Funding:** No funding received.  
38

39 **Competing interests:** None declared.  
40

41 **Patient and Public Involvement:** It was not possible to include patients or the public in this  
42 study.  
43

44 **Data Availability:** Additional data are available upon reasonable request.  
45

46  
47 **Author contributions:** All authors (IR, SA and RR) developed the protocol for this  
48 systematic review. IR conducted the screening of studies, data extraction and critical  
49 appraisal. RR reviewed each stage of study selection. All authors assisted in the  
50 interpretation and write up of results. All authors approved the final version to be published.  
51  
52  
53  
54  
55  
56  
57  
58  
59  
60

## REFERENCES

1. Quittner AL, Saez-Flores E, Barton JD. The psychological burden of cystic fibrosis. *Curr Opin Pulm Med* 2016;22(2):187-91.
2. Ratjen F, Bell SC, Rowe SM et al. Cystic fibrosis. *Nat Rev Dis Primers* 2015;1:15010. doi:10.1038/nrdp.2015.10.
3. Salek MS, Jones S, Rezaie M, et al. Do patient-reported outcomes have a role in the management of patients with cystic fibrosis? *Front Pharmacol* 2012;3. <https://www.ncbi.nlm.nih.gov/pmc/articles/PMC3298894/> (accessed 20 Mar 2019) doi: 10.3389/fphar.2012.00038
4. Bell SC, Bye PTP, Cooper PJ, et al. Cystic fibrosis in Australia, 2009: results from a data registry. *Med J Aust* 2011;195(7):396-400.
5. Royce FH, Carl JC. Health-related quality of life in cystic fibrosis. *Curr Opin Pediatr* 2011;23(5):535-40. doi: 10.1097/MOP.0b013e32834a7829
6. Trinick R, Southern KW, McNamara PS. Assessing the Liverpool Respiratory Symptom Questionnaire in children with cystic fibrosis. *Eur Respir J*. 2012;39(4):899-905. doi: 10.1183/09031936.00070311
7. Elborn JS. Cystic fibrosis. *The Lancet* 2016;388(10059):2519-31. doi: [https://doi.org/10.1016/S0140-6736\(16\)00576-6](https://doi.org/10.1016/S0140-6736(16)00576-6)
8. World Health Organisation. WHOQOL-BREF : introduction, administration, scoring and generic version of the assessment: field trial version, December 1996. Geneva; World Health Organisation; 1996.
9. Blackwell LS, Marciel KK, Quittner AL. Utilization of patient-reported outcomes as a step towards collaborative medicine. *Paediatr Respir Rev* 2013;14(3):146-51.
10. Williams K, Sansoni J, Morris D. Patient-reported outcome measures: Literature review. Sydney; Australian Commission for Safety and Quality in Health Care; 2016
11. Ruseckaite R, Ahern S, Ranger T et al. Australian Cystic Fibrosis Data Registry Annual Report, 2017. Melbourne; Monash University Department of Epidemiology and Preventive Medicine; 2019
12. Ahern S, Sims G, Earnest A, S CB. Optimism, opportunities, outcomes: the Australian Cystic Fibrosis Data Registry. *Intern Med J* 2018;48(6):721-3.
13. Devlin N, Appleby J, Buxton M, et al. Getting the most out of PROMs. London; The King's Fund; 2010
14. Collecting Patient Reported Outcomes Measures in Victoria Consultation Paper. Melbourne; Department of Health and Human Services; 2016
15. Nelson EC, Eftimovska E, Lind C, et al. Patient Reported Outcome Measures in Practice. *BMJ* 2015;350. [www.jstor.org/stable/26518240](http://www.jstor.org/stable/26518240) (accessed 8 Apr 2019) doi: 10.1136/bmj.g7818
16. Weitzman ER, Wisk LE, Salimian PK, et al. Adding patient-reported outcomes to a multisite registry to quantify quality of life and experiences of disease and treatment for youth with juvenile idiopathic arthritis. *J Patient Rep Outcomes*. 2018;2(1). <https://link.gale.com/apps/doc/A554974377/AONE?u=monash&sid=AONE&xid=3b2bd1a0> (accessed 8 Apr 2019) doi: <http://dx.doi.org.ezproxy.lib.monash.edu.au/10.1186/s41687-017-0025-2>
17. Thompson C, Sansoni J, Morris D, et al. Patient-reported Outcome Measures: An environmental scan of the Australian healthcare sector. Sydney; Australian Commission on Safety and Quality in Health Care; 2016
18. Moher D, Shamseer L, Clarke M, et al. Preferred reporting items for systematic review and meta-analysis protocols (PRISMA-P) 2015 statement. *Syst Rev* 2015;4(1):1. doi: <http://dx.doi.org.ezproxy.lib.monash.edu.au/10.1186/2046-4053-4-1>
19. Mookkink LB, Terwee CB, Patrick DL, et al. COSMIN checklist manual. *Qual Life Res* 2018;27(5):1171-1179. doi: 10.1007/s1136-017-1765-4 [Published Online First: 19 December 2017]
20. Bodnar R, Kadar L, Szabo L, et al. Health Related Quality of Life of Children with Chronic Respiratory Conditions. *Adv Clin Exp Med*. 2015;24(3):487-95. doi: 10.17219/acem/24991



21. Chevreul K, Berg Brigham K, Michel M, et al. Costs and health-related quality of life of patients with cystic fibrosis and their carers in France. *J Cyst Fibros* 2015;14(3):384-91. doi: <http://dx.doi.org/10.1016/j.jcf.2014.11.006>
22. Driscoll KA, Modi AC, Filigno SS, et al. Quality of life in children with CF: Psychometrics and relations with stress and mealtime behaviors. *Pediatr Pulmonol* 2015;50(6):560-7. doi: 10.1002/ppul.23149
23. Kianifar HR, Bakhshoodeh B, Hebrani P, et al. Quality of Life in Cystic Fibrosis Children. *Iran J Pediatr* 2013;23(2):149-53.
24. Kir D, Gupta S, Jolly G, et al. Health Related Quality of Life in Indian Children with Cystic Fibrosis. *Indian Pediatr* 2015;52(5):403-8.
25. Schmidt A, Wenninger K, Niemann N, et al. Health-related quality of life in children with cystic fibrosis: validation of the German CFQ-R. *Health Qual Life Outcomes* 2009;7:97. doi: 10.1186/1477-7525-7-97
26. Edwards TC, Emerson J, Genatossio A, et al. Initial development and pilot testing of observer-reported outcomes (ObsROs) for children with cystic fibrosis ages 0-11 years. *J Cyst Fibros* 2018;17(5):680-6. doi: <https://doi.org/10.1016/j.jcf.2017.12.008>
27. Tluczek A, Becker T, Grieve A, et al. Health-related quality of life in children and adolescents with cystic fibrosis: convergent validity with parent-reports and objective measures of pulmonary health. *J Dev Behav Pediatr* 2013;34(4):252-61.
28. Flume PA, Suthoff ED, Kosinski M, et al. Measuring recovery in health-related quality of life during and after pulmonary exacerbations in patients with cystic fibrosis. *J Cyst Fibros*. 2018. <https://www.sciencedirect-com.ezproxy.lib.monash.edu.au/science/article/pii/S1569199318309421> [accessed 25 Mar 2019] doi: <https://doi.org/10.1016/j.jcf.2018.12.004>
29. Abbott J, Morton AM, Hurley MA, et al. Longitudinal impact of demographic and clinical variables on health-related quality of life in cystic fibrosis. *BMJ Open* 2015;5(5):e007418. [https://bmjopen.bmj.com/content/5/5/e007418?utm\\_source=trendmd&utm\\_medium=cpc&utm\\_campaign=bmjopen&trendmd-shared=1&utm\\_content=Journalcontent&utm\\_term=TrendMDPhase4](https://bmjopen.bmj.com/content/5/5/e007418?utm_source=trendmd&utm_medium=cpc&utm_campaign=bmjopen&trendmd-shared=1&utm_content=Journalcontent&utm_term=TrendMDPhase4) [accessed 20 Mar 2019] doi:10.1136/bmjopen-2014-007418
30. Dill EJ, Dawson R, Sellers DE, et al. Longitudinal trends in health-related quality of life in adults with cystic fibrosis. *Chest* 2013;144(3):981-9. doi: 10.1378/chest.12-1404
31. Solem CT, Vera-Llonch M, Liu S, et al. Impact of pulmonary exacerbations and lung function on generic health-related quality of life in patients with cystic fibrosis. *Health Qual Life Outcomes* 2016;14:63. doi: 10.1186/s12955-016-0465-z
32. Abbott J, Hurley MA, Morton AM, et al. Longitudinal association between lung function and health-related quality of life in cystic fibrosis. *Thorax* 2013;68(2):149-54. doi:10.1136/thoraxjnl-2012-202552
33. Norrish C, Norrish M, Fass U, et al. The Cystic Fibrosis Symptom Progression Survey (CF-SPS) in Arabic: A Tool for Monitoring Patients' Symptoms. *Oman Med J* 2015;30(1):17-25.
34. de Souza Serio dos Santos DM, Deon KC, Fegadolli C, et al. Cultural adaptation and initial psychometric properties of the DISABKIDS®- Cystic Fibrosis Module - Brazilian version. *Rev Esc Enferm USP* 2013;47(6):1311-7 doi: 10.1590/S0080-623420130000600009
35. Modi AC, Lim CS, Driscoll KA, et al. Changes in pediatric health-related quality of life in cystic fibrosis after IV antibiotic treatment for pulmonary exacerbations. *J Clin Psychol Med Settings*. 2010;17(1):49-55.
36. Oliver KN. Longitudinal study of perceived stigma, disclosure, and optimism in adolescents and adults living with cystic fibrosis: Measuring the impact on psychological and physical health. Dissertation Abstracts International: Section B: The Sciences and Engineering. 2016;76(11-B(E)):No Pagination Specified.
37. Platten MJ, Newman E, Quayle E. Self-esteem and its relationship to mental health and quality of life in adults with cystic fibrosis. *J Clin Psychol Med Settings* 2013;20(3):392-9 doi: 10.1007/s10880-012-9346-8

- 1
- 2
- 3
- 4 38. Quittner AL, Sawicki GS, McMullen A, et al. Erratum to: Psychometric evaluation of the Cystic
- 5 Fibrosis Questionnaire-Revised in a national, US sample. *Qual Life Res* 2012;21(7):1279-90. doi:
- 6 10.1007/s11136-011-0091-5
- 7 39. Sole A, Oliveira C, Perez I, et al. Development and electronic validation of the revised Cystic
- 8 Fibrosis Questionnaire (CFQ-R Teen/Adult): New tool for monitoring psychosocial health in CF. *J Cyst*
- 9 *Fibros* 2018;17(5):672-9. doi: <https://doi.org/10.1016/j.jcf.2017.10.015>
- 10 40. Simon SL, Duncan CL, Horky SC, et al. Body satisfaction, nutritional adherence, and quality of
- 11 life in youth with cystic fibrosis. *Pediatr Pulmonol* 2011;46(11):1085-92. [https://onlinelibrary-wiley-](https://onlinelibrary-wiley-com.ezproxy.lib.monash.edu.au/doi/full/10.1002/ppul.21477)
- 12 [com.ezproxy.lib.monash.edu.au/doi/full/10.1002/ppul.21477](https://onlinelibrary-wiley-com.ezproxy.lib.monash.edu.au/doi/full/10.1002/ppul.21477) [accessed 25 Mar 2019] doi:
- 13 10.1002/ppul.21477
- 14 41. Schmidt AM, Jacobsen U, Bregnballe V, et al. Exercise and quality of life in patients with
- 15 cystic fibrosis: A 12-week intervention study. *Physiother* 2011;27(8):548-56. doi:
- 16 10.3109/09593985.2010.545102
- 17 42. Abbott J, Hart A, Morton AM, et al. Can health-related quality of life predict survival in adults
- 18 with cystic fibrosis? *Am J Respir Crit Care Med* 2009;179(1):54-8.
- 19 43. Forte GC, Barni GC, Perin C, et al. Relationship Between Clinical Variables and Health-Related
- 20 Quality of Life in Young Adult Subjects With Cystic Fibrosis. *Respir Care* 2015;60(10):1459-68. doi:
- 21 10.4187/respcare.03665
- 22 44. Kelemen L, Lee AL, Button BM, et al. Pain impacts on quality of life and interferes with
- 23 treatment in adults with cystic fibrosis. *Physiother Res Int* 2012;17(3):132-41. doi: 10.1002/pri.524
- 24 45. Stofa M, Xanthos T, Ekmektzoglou K, et al. Quality of life in adults with cystic fibrosis: the
- 25 Greek experience. *Pneumonol Alergol Pol* 2016;84(4):205-11 doi: 10.5603/PiAP.2016.0025
- 26 46. Tomaszek L, Debska G, Cepuch G, et al. Evaluation of quality of life predictors in adolescents
- 27 and young adults with cystic fibrosis. *Heart and Lung* 2018;48(2):159-165 doi:
- 28 <https://doi.org/10.1016/j.hrtlng.2018.08.003>
- 29 47. Uchmanowicz I, Jankowska-Polanska B, Rosinczuk J, et al. Health-related quality of life of
- 30 patients suffering from cystic fibrosis. *Adv* 2015;24(1):147-52 doi: 10.17219/acem/38147
- 31 48. Yohannes AM, Dodd M, Morris J, et al. Reliability and validity of a single item measure of
- 32 quality of life scale for adult patients with cystic fibrosis. *Health Qual Life Outcomes* 2011;9:105.
- 33 49. Yohannes AM, Willgoss TG, Fatoye FA, et al. Relationship between anxiety, depression, and
- 34 quality of life in adult patients with cystic fibrosis. *Respir Care* 2012;57(4):550-6. doi:
- 35 10.4187/respcare.01328
- 36 50. Aguiar KCA, Marson FAL, Gomez CCS, et al. Physical performance, quality of life and sexual
- 37 satisfaction evaluation in adults with cystic fibrosis: An unexplored correlation. *Rev Port Pneumol*
- 38 2017;23(4):179-92. doi: <http://dx.doi.org/10.1016/j.rppnen.2017.02.00>
- 39 51. Cohen MA, Ribeiro MA, Ribeiro AF, et al. Quality of life assessment in patients with cystic
- 40 fibrosis by means of the Cystic Fibrosis Questionnaire. *J Bras Pneumol* 2011;37(2):184-92.
- 41 52. Eidt-Koch D, Mittendorf T, Greiner W. Cross-sectional validity of the EQ-5D-Y as a generic
- 42 health outcome instrument in children and adolescents with cystic fibrosis in Germany. *BMC Pediatr*
- 43 2009;9:55 doi: 10.1186/1471-2431-9-55
- 44 53. Shoff SM. Nutritional status and quality of life in children with CF aged 9 to 19 years. *Pediatr*
- 45 *Pulmonol* 2014;38):174-6 doi: <http://dx.doi.org/10.1016/j.jcf.2013.01.00>
- 46 54. Tibosch MM, Sintnicolaas CJ, Peters JB, et al. How about your peers? Cystic fibrosis
- 47 questionnaire data from healthy children and adolescents. *BMC Pediatr* 2011;11:86 doi:
- 48 55. Tluczek A, Becker T, Laxova A, et al. Relationships among health-related quality of life,
- 49 pulmonary health, and newborn screening for cystic fibrosis. *Chest* 2011;140(1):170-7. doi:
- 50 10.1378/chest.10-1504
- 51 56. de Souza Serio dos Santos DM, Deon KC, Bullinger M, et al. Validity of the DISABKIDS® -
- 52 Cystic Fibrosis Module for Brazilian children and adolescents. *Rev Lat Am Enfermagem*
- 53 2014;22(5):819-25 doi: 10.1590/0104-1169.3450.2485
- 54
- 55
- 56
- 57
- 58
- 59
- 60

- 1
- 2
- 3 57. Goss CH, Edwards TC, Ramsey BW, et al. Patient-reported respiratory symptoms in cystic
- 4 fibrosis. *J Cyst Fibros* 2009;8(4):245-52 doi: doi:10.1016/j.jcf.2009.04.003
- 5
- 6 58. Ward N, Stiller K, Rowe H, et al. The psychometric properties of the Leicester Cough
- 7 Questionnaire and Respiratory Symptoms in CF tool in cystic fibrosis: A preliminary study. *J Cyst*
- 8 *Fibros* 2017;16(3):425-32 doi: <http://dx.doi.org/10.1016/j.jcf.2016.11.011>
- 9
- 10 59. Henry B, Aussage P, Grosskopf C, et al. Measuring Quality of Life in Children with Cystic
- 11 Fibrosis: The Cystic Fibrosis Questionnaire (CFQ). *Qual Life Res* 1997;6(7/8):657.
- 12
- 13 60. Wenninger K, Aussage P, Wahn U, et al. The Revised German Cystic Fibrosis Questionnaire"
- 14 Validation of a Disease-specific Health-related Quality of Life Instrument. *Qual Life Res*
- 15 2003;12(1):77-85
- 16
- 17 61. Gancz DW, Cunha MT, Leone C, et al. Quality of life amongst adolescents and young adults
- 18 with cystic fibrosis: correlations with clinical outcomes. *Clinics* 2018;73:e427.
- 19
- 20 62. Alpern AN, Brumback LC, Ratjen F, et al. Initial evaluation of the Parent Cystic Fibrosis
- 21 Questionnaire--Revised (CFQ-R) in infants and young children. *J Cyst Fibros* 2015;14(3):403-11. doi:
- 22 <http://dx.doi.org/10.1016/j.jcf.2014.11.002>
- 23
- 24 63. Acaster S, Pinder B, Mukuria C, et al. Mapping the EQ-5D index from the cystic fibrosis
- 25 questionnaire-revised using multiple modelling approaches. *Health Qual Life Outcomes* 2015;13:33
- 26 doi: 10.1186/s12955-015-0224-6
- 27
- 28 64. Cronly J, Duff A, Riekert K, et al. Positive mental health and wellbeing in adults with cystic
- 29 fibrosis: A cross sectional study. *J Psychosom Res* 2019;116:125-30. doi:
- 30 <https://doi.org/10.1016/j.jpsychores.2018.11.016>
- 31
- 32 65. Hochwalder J, Bergsten Brucefors A, Hjelte L. Psychometric evaluation of the Swedish
- 33 translation of the revised Cystic Fibrosis Questionnaire in adults. *Ups J Med Sci* 2017;122(1):61-6.
- 34 doi: <http://dx.doi.org/10.1080/03009734.2016.1225871>
- 35
- 36 66. Sawicki GS, Sellers DE, Robinson WM. Associations between illness perceptions and health-
- 37 related quality of life in adults with cystic fibrosis. *J Psychosom Res* 2011;70(2):161-7
- 38 doi:10.1016/j.jpsychores.2010.06.005
- 39
- 40 67. Borawska-Kowalczyk U, Sands D. Determinants of health-related quality of life in polish
- 41 patients with CF - adolescents' and parents' perspectives. *Med Wieku Rozwoj* 2015;19(1):127-36.
- 42
- 43 68. Sawicki GS, Rasouliyan L, McMullen AH, et al. Longitudinal assessment of health-related
- 44 quality of life in an observational cohort of patients with cystic fibrosis. *Pediatr Pulmonol*
- 45 2011;46(1):36-44 doi: 10.1002/ppul.21325
- 46
- 47 69. Sole A, Perez I, Vazquez I, et al. Patient-reported symptoms and functioning as indicators of
- 48 mortality in advanced cystic fibrosis: A new tool for referral and selection for lung transplantation. *J*
- 49 *Heart Lung Transplant* 2016;35(6):789-94 doi: <http://dx.doi.org/10.1016/j.healun.2016.01.1233>
- 50
- 51 70. Yuksel H, Yilmaz O, Dogru D, et al. Reliability and validity of the Cystic Fibrosis Questionnaire-
- 52 Revised for children and parents in Turkey: cross-sectional study. *Qual Life Res* 2013;22(2):409-14.
- 53 doi: 10.1007/s11136-012-0152-4
- 54
- 55 71. Debska G, Cepuch G, Mazurek H. Quality of life in patients with cystic fibrosis depending on
- 56 the severity of the disease and method of its treatment. *Postepy Hig Med Dosw (Online)*
- 57 2014;68:498-502.
- 58
- 59 72. Del Corral T, Percegon J, Lopez N, et al. Validity of a Spanish Version of the Leicester Cough
- 60 Questionnaire in Children With Cystic Fibrosis. *Arch Bronconeumol* 2016;52(2):63-9.

- 1
- 2
- 3
- 4 76. Chan DK, McNamara S, Park JS, et al. Sinonasal Quality of Life in Children With Cystic
- 5 Fibrosis. *JAMA Otolaryngol Head Neck Surg* 2016;142(8):743-9. doi: 10.1001/jamaoto.2016.0979
- 6 77. Kang SH, Meotti CD, Bombardelli K, et al. Sinonasal characteristics and quality of life by
- 7 SNOT-22 in adult patients with cystic fibrosis. *Eur Arch Otorhinolaryngol* 2017;274(4):1873-82 doi:
- 8 0.1007/s00405-016-4426-2
- 9 78. Powell CVE, McNamara P, Solis A, et al. A parent completed questionnaire to describe the
- 10 patterns of wheezing and other respiratory symptoms in infants and preschool children. *Arch Dis*
- 11 *Child*. 2002;87(5):376-9. doi: <http://dx.doi.org/10.1136/adc.87.5.376>
- 12 79. Birring SS, Prudon B, Carr AJ, et al. Development of a symptom specific health status
- 13 measure for patients with chronic cough: Leicester Cough Questionnaire (LCQ). *Thorax*.
- 14 2003;58(4):339-43. doi: <http://dx.doi.org/10.1136/thorax.58.4.339>
- 15 80. Goldbeck L, Besier T, Hinz A, et al. Prevalence of symptoms of anxiety and depression in
- 16 German patients with cystic fibrosis. *Chest* 2010;138(4):929-36.
- 17 81. Olveira C, Sole A, Giron R, et al. Depression and anxiety symptoms in Spanish adult patients
- 18 with cystic fibrosis: Associations with health-related quality of life. *Gen Hosp Psychiatry* 2016;40:39-
- 19 46.
- 20 82. Quon BS, Bentham WD, Unutzer J, et al. Prevalence of symptoms of depression and anxiety
- 21 in adults with cystic fibrosis based on the PHQ-9 and GAD-7 screening questionnaires.
- 22 *Psychosomatics* 2015;56(4):345-53.
- 23 83. Angelis A, Kanavos P, Lopez-Bastida J, et al. Social and economic costs and health-related
- 24 quality of life in non-institutionalised patients with cystic fibrosis in the United Kingdom. *BMC Health*
- 25 *Serv Res* 2015;15:428 doi: 10.1186/s12913-015-1061-3
- 26 84. Bradley JM, Blume SW, Balp MM, et al. Quality of life and healthcare utilisation in cystic
- 27 fibrosis: a multicentre study. *Eur Respir J* 2013;41(3):571-7 doi: 10.1183/09031936.00224911
- 28 85. Chevreur K, Michel M, Brigham K, et al. Social/economic costs and health-related quality of
- 29 life in patients with cystic fibrosis in Europe. *Eur J Health Econ* 2016;17:7-18 doi: 10.1007/s10198-
- 30 016-0781-6
- 31 86. Vandeleur M, Walter LM, Armstrong DS, et al. Quality of life and mood in children with cystic
- 32 fibrosis: Associations with sleep quality. *J Cyst Fibros* 2018;17(6):811-20 doi:
- 33 <https://doi.org/10.1016/j.jcf.2017.11.021>
- 34 87. Uchmanowicz I, Jankowska-Polańska B, Wleklík M, et al. Health-related quality of life of
- 35 patients with cystic fibrosis assessed by the SF-36 questionnaire. *Pneumonol Alergol Pol*
- 36 2014;82(1):10-7
- 37 88. Varni WJ, Seid AM, Rode AC. The PedsQL™: Measurement Model for the Pediatric Quality of
- 38 Life Inventory. *Medical Care* 1999;37(2):126-39.
- 39 89. Use of Patient-Reported Outcomes in Registries. In: Glicklich RE, Dryer NA, Leavy MB, eds.
- 40 Registries for Evaluating Patient Outcomes: A User's Guide 2. Rockville, MD: Agency for Healthcare
- 41 Research and Quality 2014
- 42 90. Backstrom-Eriksson L, Bergsten-Brucefors A, Hjelte L, et al. Associations between genetics,
- 43 medical status, physical exercise and psychological well-being in adults with cystic fibrosis. *BMJ Open*
- 44 *Respir Res* 2016;3:e000141 <https://bmjopenrespres.bmj.com/content/bmjresp/3/1/e000141.full.pdf>
- 45 [accessed 15 Mar 2019] doi:10.1136/bmjresp-2016-000141
- 46 91. Australian Institute of Health and Welfare. Australia's Health 2018. Canberra; Australian
- 47 Institute of Health and Welfare; 2018
- 48 92. Wilcox N, McNeil JJ. Clinical quality registries have the potential to drive improvements in
- 49 the appropriateness of care. *Med J Aust* 2016;205(S10):S21-S6 doi:
- 50 <https://doi.org/10.5694/mja15.00921>
- 51 93. Gee L, Abbott J, Conway SP, et al. Development of a disease specific health related quality of
- 52 life measure for adults and adolescents with cystic fibrosis. *Thorax* 2000;55(11):946-54.
- 53
- 54
- 55
- 56
- 57
- 58
- 59
- 60

- 1  
2  
3 94. Henry B, Aussage P, Grosskopf C, et al. Development of the Cystic Fibrosis Questionnaire  
4 (CFQ) for assessing quality of life in pediatric and adult patients. *Qual Life Res.* 2003;12(1):63-76. doi:  
5 <https://doi.org/10.1023/A:1022037320039>  
6  
7 95. Cavanaugh K, Read L, Dreyfus J, et al. Association of poor sleep with behavior and quality of  
8 life in children and adolescents with cystic fibrosis. *Sleep Biol Rhythms* 2016;14(2):199-204 doi:  
9 [10.1007/s41105-015-0044-4](https://doi.org/10.1007/s41105-015-0044-4)  
10  
11  
12  
13  
14  
15  
16  
17  
18  
19  
20  
21  
22  
23  
24  
25  
26  
27  
28  
29  
30  
31  
32  
33  
34  
35  
36  
37  
38  
39  
40  
41  
42  
43  
44  
45  
46  
47  
48  
49  
50  
51  
52  
53  
54  
55  
56  
57  
58  
59  
60

For peer review only

1  
2  
3  
4  
5  
6  
7  
8  
9  
10  
11  
12  
13  
14  
15  
16  
17  
18  
19  
20  
21  
22  
23  
24  
25  
26  
27  
28  
29  
30  
31  
32  
33  
34  
35  
36  
37  
38  
39  
40  
41  
42  
43  
44  
45  
46  
47  
48  
49  
50  
51  
52  
53  
54  
55  
56  
57  
58  
59  
60

Identification

Total records identified (n=5671)  
 Embase (n=3606)  
 Medline (n=1325)  
 Scopus (n=291)  
 CINAHL (n=251)  
 PsycINFO (n=111)  
 Cochrane (n=87)

Screening

Duplicates removed  
 (n=1141)

Records excluded  
 (n=4416)  
 No PROM or HRQOL  
 (n=3159)  
 No diagnosed CF (n=820)  
 Conference abstracts (n=248)  
 No patient focus (n=140)  
 No abstract or title (n=29)  
 RCTs (n=19)  
 Non-English (n=1)

Eligibility

Records screened  
 (n=4530)

Full-text articles assessed  
 (n=114)

Full-text articles excluded  
 (n=23)  
 Reviews (n=7)  
 Full text not found (n=5)  
 No HRQOL (n=5)  
 Not CF focused (n=3)  
 No specific PROM (n=1)  
 Not most updated (n=1)  
 Editorial (n=1)

Included

Total number of studies retained  
 (n=91)

## Supplementary File 1: Complete search strategy

|                 |                                                                                                                            |
|-----------------|----------------------------------------------------------------------------------------------------------------------------|
| <b>Database</b> | <b>OVID MEDLINE</b>                                                                                                        |
| <b>Strategy</b> | <b>#1 OR #2 AND #3</b><br>Limit English language and humans and last 10 years                                              |
| #1              | Patient Reported Outcome Measures/exp OR "Surveys and Questionnaires/exp OR Self Report/exp or Perception/exp OR scale.mp  |
| #2              | "Quality of Life"/exp OR QOL.mp OR "health related quality of life". mp                                                    |
| #3              | Cystic Fibrosis/exp                                                                                                        |
| <b>Database</b> | <b>PsycINFO</b>                                                                                                            |
| <b>Strategy</b> | <b>#1 OR #2 AND #3</b><br>Limit English language and humans and last 10 years                                              |
| #1              | Patient reported outcome.mp OR Self Report/exp OR Client Attitudes/exp OR Questionnaires/exp OR Perception/exp OR scale.mp |
| #2              | "Quality of Life"/exp OR QOL.mp                                                                                            |
| #3              | Cystic Fibrosis/ exp                                                                                                       |
| <b>Database</b> | <b>Scopus</b>                                                                                                              |
| <b>Strategy</b> | <b>#1 OR #2 AND #3</b><br>Limit English language and Publication Year 2009 – 2019 and Final Publication                    |
| #1              | patient AND reported AND outcome* OR self-report* OR questionnaire OR scale OR perception                                  |
| #2              | quality AND of AND life                                                                                                    |
| #3              | cystic AND fibrosis                                                                                                        |
| <b>Database</b> | <b>Embase</b>                                                                                                              |
| <b>Strategy</b> | <b>#1 OR #2 AND #3</b><br>Limit English language and humans and last 10 years                                              |
| #1              | Patient-reported outcome/exp OR questionnaire/exp OR self report/exp or perception/exp OR scale.mp                         |
| #2              | Quality of life/exp OR QOL.mp                                                                                              |
| #3              | Cystic Fibrosis/ exp                                                                                                       |
| <b>Database</b> | <b>Cochrane</b>                                                                                                            |
| <b>Strategy</b> | <b>#1 OR #2 AND #3</b><br>Limit English language and humans and last 10 years                                              |
| #1              | Patient Reported Outcome Measures/exp OR Self Report/exp OR Survey and Questionnaires/exp                                  |

|                 |                                                                                   |                                                                                                  |
|-----------------|-----------------------------------------------------------------------------------|--------------------------------------------------------------------------------------------------|
|                 | #2                                                                                | Quality of Life/exp                                                                              |
|                 | #3                                                                                | Cystic Fibrosis/ exp                                                                             |
| <b>Database</b> | <b>CINAHL</b>                                                                     |                                                                                                  |
| <b>Strategy</b> | <b>#1 OR #2 AND #3</b><br>Limit English language and Publication Year 2009 - 2019 |                                                                                                  |
|                 | #1                                                                                | "Patient-reported Outcome Measures" OR "Self Report+" OR "Patient Attitudes" OR "Questionnaires" |
|                 | #2                                                                                | "Quality of Life+"                                                                               |
|                 | #3                                                                                | "Cystic Fibrosis"                                                                                |



1  
2  
3  
4  
5  
6  
7  
8  
9  
10  
11  
12  
13  
14  
15  
16  
17  
18  
19  
20  
21  
22  
23  
24  
25  
26  
27  
28  
29  
30  
31  
32  
33  
34  
35  
36  
37  
38  
39  
40  
41  
42  
43  
44  
45  
46  
47  
48  
49  
50  
51  
52  
53  
54  
55  
56  
57  
58  
59  
60

For peer review only

## Supplementary File 2: Results of critical appraisal using COSMIN Risk of Bias Checklist

|                      | 1. PROM development | 2. Content validity | 3. Structural validity | 4. Internal consistency | 5. Cross cultural validity | 6. Reliability | 7. Measurement Error | 8. Criterion validity | 9. Hypothesis testing for construct validity | 10. Responsiveness |
|----------------------|---------------------|---------------------|------------------------|-------------------------|----------------------------|----------------|----------------------|-----------------------|----------------------------------------------|--------------------|
| <b>CFQOL</b>         |                     |                     |                        |                         |                            |                |                      |                       |                                              |                    |
| <b>CFQOL English</b> |                     |                     |                        |                         |                            |                |                      |                       |                                              |                    |
| Abbott 2009          |                     |                     |                        | Very good               |                            | Adequate       |                      |                       | Adequate                                     |                    |
| Abbott 2013          | -                   | -                   | -                      | Very good               | -                          | Adequate       | -                    | -                     | Adequate                                     | Doubtful           |
| Abbott 2015          | -                   | -                   | -                      | Very good               | -                          | Adequate       | -                    | -                     | Adequate                                     | Doubtful           |
| Salek 2012           | -                   | Doubtful            | -                      | Doubtful                | -                          | Adequate       | -                    | -                     | Adequate                                     | -                  |
| Yohannes 2011        | -                   | -                   | -                      | -                       | -                          | Very good      | -                    | -                     | -                                            | -                  |
| Yohannes 2012        | -                   | -                   | -                      | -                       | -                          | -              | -                    | -                     | Very good                                    | -                  |
| Young 2011           | -                   | -                   | -                      | -                       | -                          | -              | -                    | -                     | Adequate                                     | -                  |
| <b>CFQOL Greek</b>   |                     |                     |                        |                         |                            |                |                      |                       |                                              |                    |
| Stofa 2016           | -                   | -                   | -                      | Doubtful                | -                          | -              | -                    | -                     | -                                            | -                  |
| <b>CFQ-R</b>         |                     |                     |                        |                         |                            |                |                      |                       |                                              |                    |
| <b>CFQ-R English</b> |                     |                     |                        |                         |                            |                |                      |                       |                                              |                    |
| Alpern 2015          | -                   | -                   | -                      | Very good               | -                          | -              | -                    | -                     | Doubtful                                     | -                  |
| Driscoll 2015        | -                   | -                   | -                      | Very good               | -                          | -              | -                    | -                     | Adequate                                     | -                  |
| Hegarty 2009         | -                   | -                   | -                      | -                       | -                          | -              | -                    | -                     | Very good                                    | -                  |
| Kilcoyne 2016        | -                   | -                   | -                      | -                       | -                          | -              | -                    | -                     | Doubtful                                     | -                  |
| Mc Hugh 2016         | -                   | -                   | -                      | Very good               | -                          | -              | -                    | -                     | Very good                                    | -                  |
| Modi 2010            | -                   | -                   | -                      | -                       | -                          | -              | -                    | -                     | -                                            | Adequate           |
| Oliver 2014          | -                   | -                   | -                      | Very good               | -                          | -              | -                    | -                     | Very good                                    | -                  |

1  
2  
3  
4  
5  
6  
7  
8  
9  
10  
11  
12  
13  
14  
15  
16  
17  
18  
19  
20  
21  
22  
23  
24  
25  
26  
27  
28  
29  
30  
31  
32  
33  
34  
35  
36  
37  
38  
39  
40  
41  
42  
43  
44  
45  
46

|                         | 1. PROM development | 2. Content validity | 3. Structural validity | 4. Internal consistency | 5. Cross cultural validity | 6. Reliability | 7. Measurement Error | 8. Criterion validity | 9. Hypothesis testing for construct validity | 10. Responsiveness |
|-------------------------|---------------------|---------------------|------------------------|-------------------------|----------------------------|----------------|----------------------|-----------------------|----------------------------------------------|--------------------|
| Quittner 2012           | -                   | -                   | -                      | Very good               | -                          | -              | -                    | -                     | Doubtful                                     | -                  |
| Sawicki 2011            | -                   | -                   | -                      | -                       | -                          | -              | -                    | -                     | Adequate                                     | -                  |
| Simon 2011              | -                   | -                   | -                      | Very good               | -                          | -              | -                    | -                     | Adequate                                     | -                  |
| Sole 2016               | -                   | -                   | -                      | -                       | -                          | Very good      | -                    | -                     | -                                            | -                  |
| <b>CFQ-R German</b>     |                     |                     |                        |                         |                            |                |                      |                       |                                              |                    |
| Herbestreit 2014        | -                   | -                   | -                      | -                       | -                          | -              | -                    | -                     | Adequate                                     | Adequate           |
| Schmidt 2009            | -                   | -                   | Adequate               | Very good               | -                          | Adequate       | -                    | -                     | Doubtful                                     | -                  |
| Sole 2018               | -                   | -                   | -                      | -                       | -                          | Very good      | -                    | -                     | -                                            | -                  |
| <b>CFQ-R Polish</b>     |                     |                     |                        |                         |                            |                |                      |                       |                                              |                    |
| Borawska Kowalczyk 2015 | -                   | -                   | -                      | Very good               | -                          | -              | -                    | -                     | Adequate                                     | -                  |
| Borawska Kowalczyk 2016 | -                   | -                   | -                      | Very good               | Inadequate                 | -              | -                    | -                     | -                                            | -                  |
| <b>CFQ-R Dutch</b>      |                     |                     |                        |                         |                            |                |                      |                       |                                              |                    |
| Havermans 2009          | -                   | -                   | -                      | Very good               | -                          | -              | -                    | -                     | Adequate                                     | -                  |
| Horck 2017              | -                   | -                   | -                      | -                       | -                          | -              | -                    | -                     | Adequate                                     | -                  |
| Tepper 2012             | -                   | -                   | -                      | -                       | -                          | -              | -                    | -                     | Adequate                                     | -                  |
| <b>CFQ-R Persian</b>    |                     |                     |                        |                         |                            |                |                      |                       |                                              |                    |
| Kianifar 2013           | -                   | -                   | -                      | -                       | -                          | Doubtful       | -                    | -                     | Adequate                                     | -                  |
| <b>CFQ-R Hindi</b>      |                     |                     |                        |                         |                            |                |                      |                       |                                              |                    |
| Kir 2015                | -                   | -                   | Inadequate             | Very good               | -                          | -              | -                    | -                     | Doubtful                                     | -                  |
| <b>CFQ-R Dutch</b>      |                     |                     |                        |                         |                            |                |                      |                       |                                              |                    |

|                          | 1. PROM development | 2. Content validity | 3. Structural validity | 4. Internal consistency | 5. Cross cultural validity | 6. Reliability | 7. Measurement Error | 8. Criterion validity | 9. Hypothesis testing for construct validity | 10. Responsiveness |
|--------------------------|---------------------|---------------------|------------------------|-------------------------|----------------------------|----------------|----------------------|-----------------------|----------------------------------------------|--------------------|
| Schmidt 2011             | -                   | -                   | -                      | Very good               | -                          | -              | -                    | -                     | -                                            | Adequate           |
| <b>CFQ-R Hungarian</b>   |                     |                     |                        |                         |                            |                |                      |                       |                                              |                    |
| Toth 2016                | -                   | -                   | -                      | -                       | -                          | -              | -                    | -                     | Doubtful                                     | -                  |
| <b>CFQ-R Swedish</b>     |                     |                     |                        |                         |                            |                |                      |                       |                                              |                    |
| Backstrom-Eriksson 2016  | -                   | -                   | -                      | -                       | -                          | -              | -                    | -                     | Doubtful                                     | -                  |
| Hochwalder 2017          | -                   | -                   | -                      | Very good               | -                          | Adequate       | -                    | -                     | Doubtful                                     | -                  |
| <b>CFQ-R Turkish</b>     |                     |                     |                        |                         |                            |                |                      |                       |                                              |                    |
| Yuksel 2013              | -                   | -                   | -                      | Very good               | -                          | -              | -                    | -                     | Doubtful                                     | -                  |
| <b>CFQ</b>               |                     |                     |                        |                         |                            |                |                      |                       |                                              |                    |
| <b>CFQ English</b>       |                     |                     |                        |                         |                            |                |                      |                       |                                              |                    |
| Shoff 2014               | -                   | -                   | -                      | -                       | -                          | -              | -                    | -                     | -                                            | Adequate           |
| Tluczek 2011             | -                   | -                   | -                      | Very good               | -                          | -              | -                    | -                     | -                                            | Doubtful           |
| Tluczek 2013             | -                   | -                   | -                      | Very good               | -                          | -              | -                    | -                     | Doubtful                                     | -                  |
| <b>DISABKIDS-CFM</b>     |                     |                     |                        |                         |                            |                |                      |                       |                                              |                    |
| De souza dos Santos 2013 | -                   | Doubtful            | -                      | Very good               | -                          | -              | -                    | -                     | Very good                                    | -                  |
| De souza dos Santos 2014 | -                   | -                   | -                      | Very good               | -                          | Very good      | -                    | -                     | Adequate                                     | -                  |
| <b>CF Symptom Diary</b>  |                     |                     |                        |                         |                            |                |                      |                       |                                              |                    |
| Goss 2009                | Doubtful            | -                   | -                      | -                       | -                          | -              | -                    | -                     | -                                            | -                  |
| <b>CFRSD</b>             |                     |                     |                        |                         |                            |                |                      |                       |                                              |                    |
| Edwards 2018             | Adequate            | Adequate            | -                      | -                       | -                          | Very good      | -                    | -                     | Adequate                                     | -                  |

|                      | 1. PROM development | 2. Content validity | 3. Structural validity | 4. Internal consistency | 5. Cross cultural validity | 6. Reliability | 7. Measurement Error | 8. Criterion validity | 9. Hypothesis testing for construct validity | 10. Responsiveness |
|----------------------|---------------------|---------------------|------------------------|-------------------------|----------------------------|----------------|----------------------|-----------------------|----------------------------------------------|--------------------|
| <b>CFSPS</b>         |                     |                     |                        |                         |                            |                |                      |                       |                                              |                    |
| Norrish 2015         | Inadequate          | -                   | Adequate               | Doubtful                | -                          | -              | -                    | -                     | Doubtful                                     | -                  |
| <b>Res-CF</b>        |                     |                     |                        |                         |                            |                |                      |                       |                                              |                    |
| Ward 2016            | -                   | -                   | -                      | Very good               | -                          | Very good      | -                    | -                     | -                                            | Adequate           |
| <b>LCQ</b>           |                     |                     |                        |                         |                            |                |                      |                       |                                              |                    |
| <b>LCQ English</b>   |                     |                     |                        |                         |                            |                |                      |                       |                                              |                    |
| Ward 2016            | -                   | -                   | -                      | Very good               | -                          | Very good      | -                    | -                     | -                                            | Adequate           |
| <b>LCQ Spanish</b>   |                     |                     |                        |                         |                            |                |                      |                       |                                              |                    |
| Del Corral           | -                   | -                   | -                      | Very good               | -                          | Very good      | Adequate             | -                     | Adequate                                     | -                  |
| <b>LRSS</b>          |                     |                     |                        |                         |                            |                |                      |                       |                                              |                    |
| Trinick 2012         | -                   | -                   | -                      | Very good               | -                          | -              | -                    | -                     | Doubtful                                     | -                  |
| <b>SN-5</b>          |                     |                     |                        |                         |                            |                |                      |                       |                                              |                    |
| Chan 2016            | -                   | -                   | -                      | -                       | -                          | -              | -                    | -                     | Doubtful                                     | -                  |
| <b>HADS</b>          |                     |                     |                        |                         |                            |                |                      |                       |                                              |                    |
| Goldbeck 2010        | -                   | -                   | -                      | Very good               | -                          | -              | -                    | -                     | -                                            | Very good          |
| Yohannes 2012        | -                   | -                   | -                      | -                       | -                          | -              | -                    | -                     | Adequate                                     | -                  |
| <b>EQ-5D</b>         |                     |                     |                        |                         |                            |                |                      |                       |                                              |                    |
| <b>EQ-5D English</b> |                     |                     |                        |                         |                            |                |                      |                       |                                              |                    |
| Bradley 2013         | -                   | -                   | -                      | -                       | -                          | -              | -                    | -                     | Very good                                    | -                  |
| Solem 2016           | -                   | -                   | -                      | -                       | -                          | -              | -                    | -                     | -                                            | Adequate           |
| <b>EQ-5D German</b>  |                     |                     |                        |                         |                            |                |                      |                       |                                              |                    |
| Eidt Koch 2009       | -                   | -                   | -                      | -                       | -                          | -              | -                    | -                     | Adequate                                     | -                  |

|                  | 1. PROM development | 2. Content validity | 3. Structural validity | 4. Internal consistency | 5. Cross cultural validity | 6. Reliability | 7. Measurement Error | 8. Criterion validity | 9. Hypothesis testing for construct validity | 10. Responsiveness |
|------------------|---------------------|---------------------|------------------------|-------------------------|----------------------------|----------------|----------------------|-----------------------|----------------------------------------------|--------------------|
| PedsQL           |                     |                     |                        |                         |                            |                |                      |                       |                                              |                    |
| Modi 2009        | -                   | -                   | -                      | -                       | -                          | -              | -                    | -                     | -                                            | Adequate           |
| SF-36            |                     |                     |                        |                         |                            |                |                      |                       |                                              |                    |
| Abbott 2009      | -                   | -                   | -                      | Very good               | -                          | -              | -                    | -                     | Doubtful                                     | -                  |
| Ricotti 2017     | -                   | -                   | -                      | Doubtful                | -                          | -              | -                    | -                     | -                                            | -                  |
| Uchmanowicz 2014 | -                   | -                   | -                      | -                       | -                          | -              | -                    | -                     | Adequate                                     | -                  |
| CORE-OM          |                     |                     |                        |                         |                            |                |                      |                       |                                              |                    |
| Platten 2013     | -                   | -                   | -                      | Very good               | -                          | -              | -                    | -                     | Very good                                    | -                  |
| UKSIP            |                     |                     |                        |                         |                            |                |                      |                       |                                              |                    |
| Salek 2012       | -                   | Doubtful            | -                      | Doubtful                | -                          | Adequate       | -                    | -                     | Adequate                                     | -                  |

## Supplementary File 3: Data Extraction Table

| Author                     | Type of study      | Setting           | Patient group | Age mean (SD) | Population size, n | Instruments     | Type of PROM        | Why PROM used?                                    | Method of administration | Timepoints                              |
|----------------------------|--------------------|-------------------|---------------|---------------|--------------------|-----------------|---------------------|---------------------------------------------------|--------------------------|-----------------------------------------|
| Abbott et al, 2009, UK     | Prospective cohort | Inpatient         | All Age       | 25.1 (7.1)    | 223                | CFQOL<br>SF-36  | Specific<br>Generic | HRQOL as a predictor                              | Not stated               | At entry                                |
| Abbott et al, 2013, UK     | Longitudinal       | Outpatient Clinic | All Age       | Not stated    | 234                | CFQOL           | Specific            | Association between physical factors and HRQOL    | Postal                   | 7 assessments<br>2 yearly over 12 years |
| Abbott et al, 2015, UK     | Longitudinal       | Outpatient Clinic | All Age       | 28.5 (8.2)    | 234                | CFQOL           | Specific            | Association between demographic factors and HRQOL | Postal                   | 7 assessments<br>2 yearly over 12 years |
| Acaster et al, 2015, UK    | Cross-sectional    | National database | Adult         | 28.7 (8.88)   | 401                | CFQ-R           | Specific            | Used to validate another PROM                     | Online                   | At entry                                |
|                            |                    |                   |               |               |                    | EQ-5D           | Generic             | Economic evaluation                               |                          |                                         |
| Aguiar et al, 2017, Brazil | Cross-sectional    | Outpatient Clinic | Adult         | Not stated    | 52                 | CFQ             | Specific            | Correlate to another PROM                         | Software program         | At entry                                |
| Alpern et al, 2015, US     | Validation         | RCT data          | Child         | 2.28 (1.45)   | 314                | CFQ-R<br>Parent | Specific            | Validate PROM in new age group                    | Not stated               | 5 assessments<br>12 weeks apart         |
| Angelis et al, 2015, UK    | Cross-sectional    | National database | All Age       | 18.3 (15.1)   | 74                 | EQ-5D           | Generic             | HRQOL in a population                             | Postal and online        | At entry                                |
| Ashish et al, 2012, UK     | Cross-sectional    | Outpatient Clinic | Adult         | Not stated    | 157                | CFQ-R           | Specific            | Association between physical factors and HRQOL    | Paper                    | At entry                                |

| Author                                             | Type of study   | Setting           | Patient group | Age mean (SD) | Population size, n | Instruments | Type of PROM | Why PROM used?                                 | Method of administration | Timepoints                      |
|----------------------------------------------------|-----------------|-------------------|---------------|---------------|--------------------|-------------|--------------|------------------------------------------------|--------------------------|---------------------------------|
| Backstrom-Eriksson et al, 2016, Sweden             | Cross-sectional | Outpatient Clinic | Adult         | 32.2          | 68                 | CFQ-R       | Specific     | Association between physical factors and HRQOL | Paper                    | At entry                        |
|                                                    |                 |                   |               |               |                    | HADS        | Generic      | Association between physical factors and HRQOL | Paper                    |                                 |
| Bhati et al, 2012, US                              | Longitudinal    | Inpatient         | Child         | 13.1 (3.8)    | 22                 | CFQ-R       | Specific     | Correlate to diagnostic test                   | Not stated               | 3 assessments<br>1 week apart   |
| Blackwell et al, 2013, US                          | Longitudinal    | RCT data          | Child         | 15.8 (2.9)    | 95                 | CFQ-R       | Specific     | Association between physical factors and HRQOL | Not stated               | 3 assessments<br>3 months apart |
| Bodnar et al, 2014, Hungary                        | Cross-sectional | Outpatient Clinic | All Age       | 14.3 (4.81)   | 59                 | CFQ-R       | Specific     | Association between physical factors and HRQOL | Not stated               | At entry                        |
| Bodnar et al, 2015, Hungary                        | Cross-sectional | Outpatient Clinic | Child         | 11.61 (2.56)  | 172                | PedsQL      | Generic      | Association between physical factors and HRQOL | Not stated               | At entry                        |
| Borawska-Kowalczyk et al, 2015, Poland             | Cross-sectional | Outpatient Clinic | Child         | 14.41 (2.61)  | 70                 | CFQ-R       | Specific     | Association between physical factors and HRQOL | Not stated               | At entry                        |
| Borawska-Kowalczyk et al, 2015, Poland and Hungary | Cross-sectional | Outpatient Clinic | Child         | 13.63 (2.93)  | 141                | CFQ-R       | Specific     | HRQOL in a population                          | Not stated               | At entry                        |



| Author                              | Type of study                 | Setting                                            | Patient group | Age mean (SD) | Population size, n | Instruments | Type of PROM | Why PROM used?                                 | Method of administration | Timepoints                    |
|-------------------------------------|-------------------------------|----------------------------------------------------|---------------|---------------|--------------------|-------------|--------------|------------------------------------------------|--------------------------|-------------------------------|
| Bouka et al, 2012, Germany          | Cross-sectional               | Outpatient Clinic                                  | Adult         | 34.4 (7.5)    | 55                 | CFQ-R       | Specific     | Association between physical factors and HRQOL | Not stated               | At entry                      |
| Bradley et al, 2013, UK             | Longitudinal                  | Not stated                                         | All Age       | 28.5 (8.2)    | 94                 | EQ-5D       | Generic      | Economic evaluation                            | Not stated               | At entry and 8-12 weeks later |
|                                     |                               |                                                    |               |               |                    | CFQ-R       | Specific     | Correlate to another PROM                      | Not stated               |                               |
| Cavanaugh et al, 2016, US           | Cross-sectional               | Outpatient Clinic                                  | Child         | 11.6 (3.6)    | 50                 | CFQ-R       | Specific     | Association between physical factors and HRQOL | Not stated               | At entry                      |
| Chan et al, 2016, US                | Cross-sectional               | Outpatient Clinic                                  | Child         | 12.9 (5.6)    | 47                 | SN-5        | Respiratory  | Association between physical factors and HRQOL | Paper                    | At entry                      |
| Chevreur et al, 2015, France        | Retrospective cross-sectional | Outpatient Clinic, CF Society, patient association | All Age       | 15.4 (11.3)   | 240                | EQ-5D       | Generic      | HRQOL in a population                          | Online                   | At entry                      |
| Chevreur et al, 2016, Multinational | Cross-sectional               | Outpatient Clinic, national registries             | All Age       | 18.5 (14.1)   | 905                | EQ-5D       | Generic      | HRQOL in a population                          | Postal or Online         | At entry                      |
| Cohen et al, 2010, Brazil           | Cross-sectional               | Outpatient Clinic                                  | All Age       | 12.5 (5.1)    | 75                 | CFQ         | Specific     | HRQOL in a population                          | Paper and Interview      | Not stated                    |
| Cronly et al, 2019, Ireland         | Cross-sectional               | Outpatient Clinic                                  | Adult         | 30.5 (9.1)    | 147                | HADS        | Generic      | Association between psychological              | Paper and Online         | At entry                      |

| Author                                        | Type of study   | Setting           | Patient group | Age mean (SD) | Population size, n | Instruments   | Type of PROM | Why PROM used?                                      | Method of administration | Timepoints                  |
|-----------------------------------------------|-----------------|-------------------|---------------|---------------|--------------------|---------------|--------------|-----------------------------------------------------|--------------------------|-----------------------------|
|                                               |                 |                   |               |               |                    |               |              | factors and HRQOL                                   |                          |                             |
|                                               |                 |                   |               |               |                    | CFQ-R         | Specific     | Association between psychological factors and HRQOL | Paper and Online         | At entry                    |
| Debska et al, 2014, Poland                    | Cross-sectional | Outpatient Clinic | Adult         | Not stated    | 45                 | CFQOL         | Specific     | Association between physical factors and HRQOL      | Not stated               | At entry                    |
| Debska et al, 2015, Poland                    | Longitudinal    | Inpatient         | All Age       | 21.1 (5.1)    | 67                 | CFQOL         | Specific     | Association between physical factors and HRQOL      | Not stated               | At entry and one year later |
| del Corral et al, 2016, Spain                 | Validation      | Inpatient         | Child         | 11.7 (3.1)    | 58                 | LCQ           | Respiratory  | Validate PROM                                       | Not stated               | At entry and 2 weeks later  |
| de Souza Serio dos Santos et al, 2013, Brazil | Validation      | Not stated        | Child         | Not stated    | 51                 | DISABKIDS-CFM | Specific     | Validate PROM                                       | Not stated               | At entry                    |
| de Souza Serio dos Santos et al, 2014, Brazil | Validation      | Outpatient Clinic | Child         | 11.91 (2.79)  | 113                | DISABKIDS-CFM | Specific     | Validate PROM                                       | Not stated               | At entry and 3 months later |
| Dill et al, 2013, US                          | Longitudinal    | Outpatient Clinic | Adult         | 32.52 (10.65) | 333                | CFQ-R         | Specific     | Examine trends in HRQOL over time                   | Postal                   | 7 assessments 3 monthly     |

| Author                         | Type of study                 | Setting           | Patient group | Age mean (SD) | Population size, n | Instruments | Type of PROM | Why PROM used?                                 | Method of administration | Timepoints                                      |
|--------------------------------|-------------------------------|-------------------|---------------|---------------|--------------------|-------------|--------------|------------------------------------------------|--------------------------|-------------------------------------------------|
| Driscoll et al, 2015, US       | Cross-sectional               | RCT data          | Child         | 3.82 (1.27)   | 73                 | CFQ-R       | Specific     | Association between social factors and HRQOL   | Not stated               | At entry                                        |
|                                |                               |                   |               |               |                    | PedsQL      | Generic      | Validate PROM in new age group                 |                          |                                                 |
| Edwards et al, 2018, US        | Qualitative                   | Outpatient Clinic | Child         | Not stated    | 37                 | CFRSD       | Specific     | Develop PROM                                   | Online                   | At entry                                        |
| Eidt-Koch et al, 2009, Germany | Cross-sectional               | Outpatient Clinic | Child         | Not stated    | 96                 | EQ-5D       | Generic      | Validate PROM                                  | Not stated               | At entry                                        |
|                                |                               |                   |               |               |                    | CFQ         | Specific     | Used to validate another PROM                  |                          |                                                 |
| Flume et al, 2018, US          | Retrospective cross-sectional | RCT data          | All Age       | Not stated    | 80                 | CFQ-R       | Specific     | Association between physical factors and HRQOL | Paper                    | 6 assessments<br>Baseline, week 2, 4, 8, 16, 24 |
| Forte et al, 2015, Brazil      | Cross-sectional               | Outpatient Clinic | Adult         | 25.1 (8.8)    | 51                 | WHOQOL-BREF | Generic      | Association between physical factors and HRQOL | Not stated               | At entry                                        |
|                                |                               |                   |               |               |                    | CFQOL       | Specific     | Association between physical factors and HRQOL |                          |                                                 |
| Gancz et al, 2018, Brazil      | Cross-sectional               | Outpatient Clinic | Child         | 16.4 (2.3)    | 31                 | CFQ-R       | Specific     | Association between physical factors and HRQOL | Interview                | At entry                                        |
| Goldbeck et al, 2010, Germany  | Cross-sectional               | Outpatient Clinic | All Age       | 23.1 (9.1)    | 670                | HADS        | Generic      | HRQOL in a population                          | Not stated               | At entry                                        |

| Author                          | Type of study                | Setting                  | Patient group | Age mean (SD) | Population size, n | Instruments      | Type of PROM | Why PROM used?                                            | Method of administration | Timepoints                   |
|---------------------------------|------------------------------|--------------------------|---------------|---------------|--------------------|------------------|--------------|-----------------------------------------------------------|--------------------------|------------------------------|
| Goss et al, 2009, US            | Qualitative                  | Outpatient Clinic        | All Age       | 12.1 (4)      | 15                 | CF Symptom Diary | Specific     | Develop PROM                                              | Not administered         | Not administered             |
| Groeneveld et al, 2012, Spain   | Cross-sectional              | Outpatient Clinic        | Child         | 11.6 (3.1)    | 28                 | CFQ-R            | Specific     | Association between social and physical factors and HRQOL | Paper and Interview      | At entry                     |
| Habib et al, 2015, Canada       | Cross-sectional              | Outpatient Clinic        | Adult         | 34.9 (11.9)   | 103                | CFQ-R            | Specific     | Association between physical factors and HRQOL            | Paper                    | At entry                     |
| Havermans et al, 2009, Belgium  | Cross-sectional              | Outpatient Clinic        | Adult         | 26.79 (8.15)  | 57                 | CFQ-R            | Specific     | Association between social factors and HRQOL              | Not stated               | At entry                     |
| Hebestreit et al, 2014, Germany | Non-randomised control trial | Outpatient Clinic        | All Age       | 20.6 (5.8)    | 70                 | CFQ-R            | Specific     | Association between physical factors and HRQOL            | Paper                    | At entry and 6 months        |
| Hegarty et al, 2009, Australia  | Cross-sectional              | Outpatient and Inpatient | Child         | 12.06 (3.97)  | 33                 | CFQ-R            | Specific     | HRQOL in a population                                     | Not stated               | At entry                     |
| Hochwalder et al, 2017, Sweden  | Validation                   | Outpatient Clinic        | Adult         | 30.8 (11.98)  | 173                | CFQ-R            | Specific     | Validate PROM                                             | Not stated               | At entry                     |
| Horck et al, 2017, Netherlands  | Longitudinal                 | Outpatient Clinic        | Child         | 10.3 (3.6)    | 49                 | CFQ-R            | Specific     | Association between physical factors and HRQOL            | Paper and Interview      | 3 assessments 6 months apart |
| Ihle et al, 2015, Germany       | Cross-sectional              | Outpatient Clinic        | Adult         | 50 (11.9)     | 152                | SF-36            | Generic      | Association between physical and demographic              | Paper                    | At entry                     |

| Author                           | Type of study   | Setting                  | Patient group | Age mean (SD) | Population size, n | Instruments | Type of PROM | Why PROM used?                                                 | Method of administration | Timepoints |
|----------------------------------|-----------------|--------------------------|---------------|---------------|--------------------|-------------|--------------|----------------------------------------------------------------|--------------------------|------------|
|                                  |                 |                          |               |               |                    |             |              | factors and HRQOL                                              |                          |            |
|                                  |                 |                          |               |               |                    | SGRQ        | Respiratory  | Association between physical and demographic factors and HRQOL |                          |            |
|                                  |                 |                          |               |               |                    | PLC         | Generic      | Association between physical and demographic factors and HRQOL |                          |            |
| Iscar-Urrutia et al, 2018, Spain | Cross-sectional | Outpatient Clinic        | Adult         | 32            | 23                 | CFQ-R       | Specific     | Association between physical factors and HRQOL                 | Paper                    | At entry   |
| Kang et al, 2017, Brazil         | Cross-sectional | Outpatient Clinic        | All Age       | 25.71 (8.13)  | 91                 | SNOT-22     | Respiratory  | Association between physical factors and HRQOL                 | Not stated               | At entry   |
| Kelemen et al, 2011, Australia   | Cross-sectional | Outpatient Clinic        | Adult         | 29.4 (8.5)    | 73                 | CFQOL       | Specific     | Association between physical factors and HRQOL                 | Not stated               | At entry   |
| Kianifar et al, 2013, Iran       | Cross-sectional | Outpatient Clinic        | Child         | 5 (3.4)       | 36                 | PedsQL      | Generic      | HRQOL in a population                                          | Not stated               | Not stated |
| Kilcoyne et al, 2016             | Cross-sectional | Outpatient and Inpatient | Adult         | 27.8 (7.9)    | 101                | CFQ-R       | Specific     | Correlate to diagnostic test                                   | Paper                    | At entry   |

| Author                     | Type of study      | Setting              | Patient group | Age mean (SD) | Population size, n | Instruments | Type of PROM | Why PROM used?                                      | Method of administration | Timepoints                   |
|----------------------------|--------------------|----------------------|---------------|---------------|--------------------|-------------|--------------|-----------------------------------------------------|--------------------------|------------------------------|
| Kir et al, 2015, India     | Cross-sectional    | Inpatient            | Child         | 11.5 (4.5)    | 59                 | CFQ-R       | Specific     | HRQOL in a population                               | Paper and Interview      | At entry                     |
| Lectzin et al, 2016, US    | Cross-sectional    | Outpatient Clinic    | Child         | 15.6 (2.5)    | 73                 | CFQ-R       | Specific     | Association between physical factors and HRQOL      | Online                   | At entry                     |
| McHugh et al, 2016, UK     | Cross-sectional    | Online Support Group | Adult         | 29 (8.34)     | 122                | CFQ-R       | Specific     | Association between psychological factors and HRQOL | Not stated               | Not stated                   |
| Modi et al, 2009, US       | Prospective cohort | Inpatient            | Child         | 13.6 (3.7)    | 52                 | PedsQL      | Generic      | HRQOL as outcome of intervention                    | Paper                    | At entry and 2 weeks later   |
|                            |                    |                      |               |               |                    | CFQ-R       | Specific     | HRQOL as outcome of intervention                    |                          |                              |
| Norrish et al, 2015, Oman  | Development        | Outpatient Clinic    | Child         | 6             | 12                 | CF-SPS      | Specific     | Develop PROM                                        | Interview                | Not stated                   |
| Oliver et al, 2015, US     | Longitudinal       | Outpatient Clinic    | All Age       | 19 (3.2)      | 71                 | HADS        | Generic      | Association between social factors and HRQOL        | Paper and Online         | 3 assessments 6 months apart |
|                            |                    |                      |               |               |                    | CFQ-R       | Specific     | Association between social factors and HRQOL        |                          |                              |
| Olveira et al, 2016, Spain | Cross-sectional    | Outpatient Clinic    | Adult         | 28.1 (8.2)    | 336                | HADS        | Generic      | Association between psychological factors and HRQOL | Paper                    | At entry                     |

| Author                                 | Type of study   | Setting                        | Patient group | Age mean (SD) | Population size, n | Instruments | Type of PROM | Why PROM used?                                      | Method of administration                 | Timepoints                                                |
|----------------------------------------|-----------------|--------------------------------|---------------|---------------|--------------------|-------------|--------------|-----------------------------------------------------|------------------------------------------|-----------------------------------------------------------|
|                                        |                 |                                |               |               |                    | CFQ-R       | Specific     | Association between psychological factors and HRQOL |                                          |                                                           |
| Platten et al, 2013, UK                | Cross-sectional | National database              | Adult         | 27.8 (9.2)    | 74                 | CFQ-R       | Specific     | Association between psychological factors and HRQOL | Online                                   | At entry                                                  |
|                                        |                 |                                |               |               |                    | CORE-OM     | Generic      | HRQOL in a population                               |                                          |                                                           |
| Quittner et al, 2009, US and Australia | Validation      | RCT data                       | All Age       | Not stated    | 200                | CFQ-R       | Specific     | Determine MCID                                      | Not stated                               | Not stated                                                |
| Quittner et al, 2010, US               | Cross-sectional | Longitudinal cohort study data | All Age       | Not stated    | 4751               | CFQ-R       | Specific     | Association between demographic factors and HRQOL   | Paper and Interview                      | At entry                                                  |
| Quittner et al, 2012, US               | Validation      | Longitudinal cohort study data | All Age       | Not stated    | 7330               | CFQ-R       | Specific     | Validate PROM                                       | Interview for children, other not stated | At entry                                                  |
| Quon et al, 2015, US                   | Cross-sectional | Outpatient Clinic              | Adult         | 28.6 (8.8)    | 153                | PHQ-9       | Generic      | HRQOL in a population                               | Not stated                               | At entry                                                  |
|                                        |                 |                                |               |               |                    | GAD-7       | Generic      | HRQOL in a population                               |                                          |                                                           |
| Ricotti et al, 2017, Italy             | Longitudinal    | Outpatient Clinic              | Adult         | 49.87 (11.8)  | 57                 | SF-36       | Generic      | HRQOL in a population                               | Interview                                | Four assessments Before LTx and 6,12, 24 months after LTx |
|                                        |                 |                                |               |               |                    | SGRQ        | Respiratory  | HRQOL in a population                               |                                          |                                                           |
|                                        |                 |                                |               |               |                    | GHQ         | Generic      | HRQOL in a population                               |                                          |                                                           |

| Author                       | Type of study                | Setting                        | Patient group | Age mean (SD) | Population size, n | Instruments | Type of PROM | Why PROM used?                                      | Method of administration | Timepoints                  |
|------------------------------|------------------------------|--------------------------------|---------------|---------------|--------------------|-------------|--------------|-----------------------------------------------------|--------------------------|-----------------------------|
| Salek et al, 2012, UK        | Cross-sectional              | Outpatient and Inpatient       | Adult         | 26.1 (7.3)    | 70                 | UKSIP       | Generic      | Used to validate another PROM                       | Postal and interview     | At entry                    |
|                              |                              |                                |               |               |                    | CFQOL       | Specific     | Validate PROM                                       |                          |                             |
| Sawicki et al, 2009, US      | Cross-sectional              | Longitudinal cohort study data | Adult         | 35.4 (10)     | 204                | CFQ-R       | Specific     | HRQOL in a population                               | Not stated               | At entry                    |
| Sawicki, 2011, US            | Cross-sectional              | Outpatient Clinic              | Adult         | 35.8 (10.3)   | 199                | CFQ-R       | Specific     | Association between psychological factors and HRQOL | Not stated               | Not stated                  |
| Sawicki et al, 2011, US      | Longitudinal                 | National database              | All Age       | Not stated    | 1366               | CFQ-R       | Specific     | Association between physical factors and HRQOL      | Not stated               | At entry and one year later |
| Schmidt et al, 2009, Germany | Validation                   | Outpatient Clinic              | Child         | 10.2 (1.9)    | 136                | CFQ-R       | Specific     | Validate PROM                                       | Paper and Interview      | At entry                    |
| Schmidt et al, 2011, Denmark | Non-randomised control trial | Outpatient Clinic              | All Age       | Not stated    | 38                 | CFQ-R       | Specific     | Association between physical factors and HRQOL      | Not stated               | At entry and 3 months later |
| Shoff et al, 2013, US        | Longitudinal                 | RCT data                       | Child         | 13.5          | 95                 | CFQ         | Specific     | Association between social factors and HRQOL        | Paper and Interview      | 3 assessments Yearly        |
| Simon et al, 2011, US        | Cross-sectional              | Outpatient Clinic              | Child         | 13.6 (2.3)    | 54                 | CFQ-R       | Specific     | Association between psychological factors and HRQOL | Paper                    | At entry                    |



| Author                           | Type of study                 | Setting                        | Patient group | Age mean (SD) | Population size, n | Instruments | Type of PROM | Why PROM used?                                    | Method of administration | Timepoints                                                                         |
|----------------------------------|-------------------------------|--------------------------------|---------------|---------------|--------------------|-------------|--------------|---------------------------------------------------|--------------------------|------------------------------------------------------------------------------------|
| Sole et al, 2016, Spain          | Longitudinal                  | Outpatient Clinic              | Adult         | 25.4 (8.5)    | 152                | CFQ-R       | Specific     | HRQOL as a predictor                              | Not stated               | 12 assessments<br>3 monthly                                                        |
| Sole et al, 2018, Spain          | Validation                    | Outpatient Clinic              | All Age       | Not stated    | 50                 | e-CFQ-R     | Specific     | Validate PROM                                     | Software program         | At entry and 15 days later                                                         |
| Solem et al, 2016, US            | Longitudinal                  | RCT data                       | All Age       | 25.5 (9.5)    | 161                | EQ-5D       | Generic      | Association between physical factors and HRQOL    | Not stated               | 8 assessments<br>Baseline, day 15,<br>week 8, every 8 weeks after through 48 weeks |
| Stofa et al, 2016, Greece        | Cross-sectional               | Not stated                     | Adult         | Not stated    | 77                 | CFQOL       | Specific     | HRQOL in a population                             | Not stated               | At entry                                                                           |
| Tepper et al, 2013, Netherlands  | Retrospective cross-sectional | Outpatient Clinic              | Child         | 13.4          | 72                 | CFQ-R RSS   | Specific     | Correlate to diagnostic test                      | Paper                    | 3 assessments<br>Yearly                                                            |
| Tibosch et al, 2011, Netherlands | Cross-sectional               | Healthy school children        | Child         | 14.52 (3.16)  | 478                | CFQ         | Specific     | HRQOL in a population                             | Paper and Interview      | At entry                                                                           |
| Tluczek et al, 2011, US          | Longitudinal                  | Longitudinal cohort study data | Child         | 13.5 (2.8)    | 95                 | CFQ         | Specific     | Association between demographic factors and HRQOL | Paper and Interview      | Not stated                                                                         |
| Tluczek et al, 2013, US          | Longitudinal                  | Longitudinal cohort study data | Child         | 13.3 (2.7)    | 92                 | CFQ         | Specific     | Assess parent-proxy reporting                     | Paper and Interview      | Not stated                                                                         |
| Tomaszek et al, 2018, Poland     | Cross-sectional               | Outpatient Clinic              | All Age       | 19            | 95                 | CFQOL       | Specific     | Association between physical factors and HRQOL    | Not stated               | Not stated                                                                         |

| Author                           | Type of study   | Setting                  | Patient group | Age mean (SD) | Population size, n | Instruments | Type of PROM | Why PROM used?                                      | Method of administration | Timepoints                                                     |
|----------------------------------|-----------------|--------------------------|---------------|---------------|--------------------|-------------|--------------|-----------------------------------------------------|--------------------------|----------------------------------------------------------------|
|                                  |                 |                          |               |               |                    | HADS        | Generic      | Association between psychological factors and HRQOL |                          |                                                                |
| Toth et al, 2016, Hungary        | Cross-sectional | Not stated               | Adult         | 28.25 (8.95)  | 57                 | CFQ-R       | Specific     | HRQOL in a population                               | Paper                    | At entry                                                       |
| Trinick et al,                   | Cross-sectional | Outpatient Clinic        | Child         | Not stated    | 63                 | LRSQ        | Respiratory  | Validate PROM in new age group                      | Not stated               | At entry                                                       |
| Uchmanowicz et al, 2014, Poland  | Cross-sectional | Outpatient Clinic        | Adult         | 24.83 (6.98)  | 30                 | SF-36       | Generic      | HRQOL in a population                               | Not stated               | Not stated                                                     |
| Uchmanowicz et al, 2015, Poland  | Cross-sectional | Outpatient Clinic        | Adult         | 24.83 (6.98)  | 30                 | CFQOL       | Specific     | Association between demographic factors and HRQOL   | Not stated               | Not stated                                                     |
| Vandeleur et al, 2018, Australia | Cross-sectional | Outpatient Clinic        | Child         | Not stated    | 87                 | CFQ-R       | Specific     | Association between physical factors and HRQOL      | Not stated               | Not stated                                                     |
|                                  |                 |                          |               |               |                    | PedsQL      | Generic      | Association between physical factors and HRQOL      |                          |                                                                |
| Ward et al, 2017, Australia      | Validation      | Outpatient and Inpatient | Adult         | 29 (9.3)      | 59                 | LCQ         | Respiratory  | Validate PROM                                       | Paper                    | 3 assessments<br>At entry, one week later and four weeks later |
|                                  |                 |                          |               |               |                    | ReS-CF      | Specific     | Develop PROM                                        |                          |                                                                |
|                                  |                 |                          |               |               |                    | CFQ-R       | Specific     | Used to validate another PROM                       |                          |                                                                |

| Author                       | Type of study   | Setting           | Patient group | Age mean (SD) | Population size, n | Instruments           | Type of PROM | Why PROM used?                                      | Method of administration | Timepoints                         |
|------------------------------|-----------------|-------------------|---------------|---------------|--------------------|-----------------------|--------------|-----------------------------------------------------|--------------------------|------------------------------------|
| Xie et al, 2017, US          | Validation      | Not stated        | Child         | 8.7 (5.28)    | 165                | SN-5                  | Respiratory  | Validate PROM in new age group                      | Not stated               | At entry and median 7 months later |
| Yohannes et al, 2011, UK     | Validation      | Outpatient Clinic | Adult         | 29.6 (8.9)    | 121                | Single item QOL scale | Generic      | Develop PROM                                        | Paper                    | At entry and 10 days later         |
|                              |                 |                   |               |               |                    | CFQOL                 | Specific     | Used to validate another PROM                       |                          |                                    |
|                              |                 |                   |               |               |                    | HADS                  | Generic      | Used to validate another PROM                       |                          |                                    |
| Yohannes et al, 2012, UK     | Cross-sectional | Outpatient Clinic | Adult         | 30 (8.8)      | 121                | CFQOL                 | Specific     | Association between psychological factors and HRQOL | Paper                    | At entry                           |
|                              |                 |                   |               |               |                    | HADS                  | Generic      | HRQOL in a population                               |                          |                                    |
| Young et al, 2011, Australia | Cross-sectional | Outpatient Clinic | Adult         | 31 (8)        | 60                 | CFQOL                 | Specific     | Association between physical factors and HRQOL      | Not stated               | Not stated                         |
| Yuksel et al, 2013, Turkey   | Validation      | Outpatient Clinic | Child         | 9.8 (2.6)     | 51                 | CFQ-R                 | Specific     | Validate PROM                                       | Not stated               | Not stated                         |
|                              |                 |                   |               |               |                    | KINDL                 | Generic      | Used to validate another PROM                       |                          |                                    |

# Reporting checklist for systematic review and meta-analysis.

Based on the PRISMA guidelines.

## Instructions to authors

Complete this checklist by entering the page numbers from your manuscript where readers will find each of the items listed below.

Your article may not currently address all the items on the checklist. Please modify your text to include the missing information. If you are certain that an item does not apply, please write "n/a" and provide a short explanation.

Upload your completed checklist as an extra file when you submit to a journal.

In your methods section, say that you used the PRISMA reporting guidelines, and cite them as:

Moher D, Liberati A, Tetzlaff J, Altman DG, The PRISMA Group. Preferred Reporting Items for Systematic Reviews and Meta-Analyses: The PRISMA Statement

|              | Reporting Item                                                                         | Page Number |
|--------------|----------------------------------------------------------------------------------------|-------------|
| <b>Title</b> |                                                                                        |             |
|              | <a href="#">#1</a> Identify the report as a systematic review, meta-analysis, or both. | 1           |

## Abstract

|    |                      |                    |                                                                 |     |
|----|----------------------|--------------------|-----------------------------------------------------------------|-----|
| 1  | Structured           | <a href="#">#2</a> | Provide a structured summary including, as applicable:          | 2   |
| 2  |                      |                    |                                                                 |     |
| 3  | summary              |                    | background; objectives; data sources; study eligibility         |     |
| 4  |                      |                    | criteria, participants, and interventions; study appraisal and  |     |
| 5  |                      |                    | synthesis methods; results; limitations; conclusions and        |     |
| 6  |                      |                    | implications of key findings; systematic review registration    |     |
| 7  |                      |                    | number                                                          |     |
| 8  |                      |                    |                                                                 |     |
| 9  |                      |                    |                                                                 |     |
| 10 |                      |                    |                                                                 |     |
| 11 |                      |                    |                                                                 |     |
| 12 |                      |                    |                                                                 |     |
| 13 |                      |                    |                                                                 |     |
| 14 |                      |                    |                                                                 |     |
| 15 | <b>Introduction</b>  |                    |                                                                 |     |
| 16 |                      |                    |                                                                 |     |
| 17 |                      |                    |                                                                 |     |
| 18 |                      |                    |                                                                 |     |
| 19 | Rationale            | <a href="#">#3</a> | Describe the rationale for the review in the context of what    | 5   |
| 20 |                      |                    | is already known.                                               |     |
| 21 |                      |                    |                                                                 |     |
| 22 |                      |                    |                                                                 |     |
| 23 |                      |                    |                                                                 |     |
| 24 | Objectives           | <a href="#">#4</a> | Provide an explicit statement of questions being addressed      | 6   |
| 25 |                      |                    | with reference to participants, interventions, comparisons,     |     |
| 26 |                      |                    | outcomes, and study design (PICOS).                             |     |
| 27 |                      |                    |                                                                 |     |
| 28 |                      |                    |                                                                 |     |
| 29 |                      |                    |                                                                 |     |
| 30 |                      |                    |                                                                 |     |
| 31 |                      |                    |                                                                 |     |
| 32 | <b>Methods</b>       |                    |                                                                 |     |
| 33 |                      |                    |                                                                 |     |
| 34 |                      |                    |                                                                 |     |
| 35 | Protocol and         | <a href="#">#5</a> | Indicate if a review protocol exists, if and where it can be    | 6   |
| 36 | registration         |                    | accessed (e.g., Web address) and, if available, provide         |     |
| 37 |                      |                    | registration information including the registration number.     |     |
| 38 |                      |                    |                                                                 |     |
| 39 |                      |                    |                                                                 |     |
| 40 |                      |                    |                                                                 |     |
| 41 |                      |                    |                                                                 |     |
| 42 | Eligibility criteria | <a href="#">#6</a> | Specify study characteristics (e.g., PICOS, length of follow-   | 6-7 |
| 43 |                      |                    | up) and report characteristics (e.g., years considered,         |     |
| 44 |                      |                    | language, publication status) used as criteria for eligibility, |     |
| 45 |                      |                    | giving rational                                                 |     |
| 46 |                      |                    |                                                                 |     |
| 47 |                      |                    |                                                                 |     |
| 48 |                      |                    |                                                                 |     |
| 49 |                      |                    |                                                                 |     |
| 50 |                      |                    |                                                                 |     |
| 51 |                      |                    |                                                                 |     |
| 52 | Information          | <a href="#">#7</a> | Describe all information sources in the search (e.g.,           | 7   |
| 53 | sources              |                    | databases with dates of coverage, contact with study            |     |
| 54 |                      |                    |                                                                 |     |
| 55 |                      |                    |                                                                 |     |
| 56 |                      |                    |                                                                 |     |
| 57 |                      |                    |                                                                 |     |
| 58 |                      |                    |                                                                 |     |
| 59 |                      |                    |                                                                 |     |
| 60 |                      |                    |                                                                 |     |

|    |                    |                                                                                  |            |
|----|--------------------|----------------------------------------------------------------------------------|------------|
| 1  |                    | authors to identify additional studies) and date last                            |            |
| 2  |                    | searched.                                                                        |            |
| 3  |                    |                                                                                  |            |
| 4  |                    |                                                                                  |            |
| 5  |                    |                                                                                  |            |
| 6  | Search             | <a href="#">#8</a> Present full electronic search strategy for at least one      | Supplement |
| 7  |                    |                                                                                  |            |
| 8  |                    | database, including any limits used, such that it could be                       | 1          |
| 9  |                    |                                                                                  |            |
| 10 |                    | repeated.                                                                        |            |
| 11 |                    |                                                                                  |            |
| 12 |                    |                                                                                  |            |
| 13 | Study selection    | <a href="#">#9</a> State the process for selecting studies (i.e., for screening, | 7          |
| 14 |                    |                                                                                  |            |
| 15 |                    | for determining eligibility, for inclusion in the systematic                     |            |
| 16 |                    | review, and, if applicable, for inclusion in the meta-                           |            |
| 17 |                    | analysis).                                                                       |            |
| 18 |                    |                                                                                  |            |
| 19 |                    |                                                                                  |            |
| 20 |                    |                                                                                  |            |
| 21 |                    |                                                                                  |            |
| 22 |                    |                                                                                  |            |
| 23 | Data collection    | <a href="#">#10</a> Describe the method of data extraction from reports (e.g.,   | 7          |
| 24 |                    |                                                                                  |            |
| 25 | process            | piloted forms, independently by two reviewers) and any                           |            |
| 26 |                    |                                                                                  |            |
| 27 |                    | processes for obtaining and confirming data from                                 |            |
| 28 |                    |                                                                                  |            |
| 29 |                    | investigators.                                                                   |            |
| 30 |                    |                                                                                  |            |
| 31 |                    |                                                                                  |            |
| 32 |                    |                                                                                  |            |
| 33 | Data items         | <a href="#">#11</a> List and define all variables for which data were sought     | 7          |
| 34 |                    |                                                                                  |            |
| 35 |                    | (e.g., PICOS, funding sources), and any assumptions and                          |            |
| 36 |                    |                                                                                  |            |
| 37 |                    | simplifications made.                                                            |            |
| 38 |                    |                                                                                  |            |
| 39 |                    |                                                                                  |            |
| 40 |                    |                                                                                  |            |
| 41 | Risk of bias in    | <a href="#">#12</a> Describe methods used for assessing risk of bias in          | 7          |
| 42 |                    |                                                                                  |            |
| 43 | individual studies | individual studies (including specification of whether this                      |            |
| 44 |                    |                                                                                  |            |
| 45 |                    | was done at the study or outcome level, or both), and how                        |            |
| 46 |                    |                                                                                  |            |
| 47 |                    | this information is to be used in any data synthesis.                            |            |
| 48 |                    |                                                                                  |            |
| 49 |                    |                                                                                  |            |
| 50 |                    |                                                                                  |            |
| 51 | Summary            | <a href="#">#13</a> State the principal summary measures (e.g., risk ratio,      | NA         |
| 52 |                    |                                                                                  |            |
| 53 | measures           | difference in means).                                                            |            |
| 54 |                    |                                                                                  |            |
| 55 |                    |                                                                                  |            |
| 56 |                    |                                                                                  |            |
| 57 |                    |                                                                                  |            |
| 58 |                    |                                                                                  |            |
| 59 |                    |                                                                                  |            |
| 60 |                    |                                                                                  |            |

|    |                    |                     |                                                               |            |
|----|--------------------|---------------------|---------------------------------------------------------------|------------|
| 1  | Planned            | <a href="#">#14</a> | Describe the methods of handling data and combining           | 7          |
| 2  |                    |                     |                                                               |            |
| 3  | methods of         |                     | results of studies, if done, including measures of            |            |
| 4  |                    |                     |                                                               |            |
| 5  | analysis           |                     | consistency (e.g., I <sup>2</sup> ) for each meta-analysis.   |            |
| 6  |                    |                     |                                                               |            |
| 7  |                    |                     |                                                               |            |
| 8  |                    |                     |                                                               |            |
| 9  | Risk of bias       | <a href="#">#15</a> | Specify any assessment of risk of bias that may affect the    | NA         |
| 10 |                    |                     |                                                               |            |
| 11 | across studies     |                     | cumulative evidence (e.g., publication bias, selective        |            |
| 12 |                    |                     | reporting within studies).                                    |            |
| 13 |                    |                     |                                                               |            |
| 14 |                    |                     |                                                               |            |
| 15 |                    |                     |                                                               |            |
| 16 | Additional         | <a href="#">#16</a> | Describe methods of additional analyses (e.g., sensitivity or | NA         |
| 17 |                    |                     |                                                               |            |
| 18 | analyses           |                     | subgroup analyses, meta-regression), if done, indicating      |            |
| 19 |                    |                     | which were pre-specified.                                     |            |
| 20 |                    |                     |                                                               |            |
| 21 |                    |                     |                                                               |            |
| 22 |                    |                     |                                                               |            |
| 23 |                    |                     |                                                               |            |
| 24 | <b>Results</b>     |                     |                                                               |            |
| 25 |                    |                     |                                                               |            |
| 26 |                    |                     |                                                               |            |
| 27 | Study selection    | <a href="#">#17</a> | Give numbers of studies screened, assessed for eligibility,   | 8          |
| 28 |                    |                     |                                                               |            |
| 29 |                    |                     | and included in the review, with reasons for exclusions at    |            |
| 30 |                    |                     | each stage, ideally with a <a href="#">flow diagram</a> .     |            |
| 31 |                    |                     |                                                               |            |
| 32 |                    |                     |                                                               |            |
| 33 |                    |                     |                                                               |            |
| 34 |                    |                     |                                                               |            |
| 35 | Study              | <a href="#">#18</a> | For each study, present characteristics for which data were   | Supplement |
| 36 |                    |                     |                                                               |            |
| 37 | characteristics    |                     | extracted (e.g., study size, PICOS, follow-up period) and     | 3          |
| 38 |                    |                     | provide the citation.                                         |            |
| 39 |                    |                     |                                                               |            |
| 40 |                    |                     |                                                               |            |
| 41 |                    |                     |                                                               |            |
| 42 | Risk of bias       | <a href="#">#19</a> | Present data on risk of bias of each study and, if available, | Supplement |
| 43 |                    |                     |                                                               |            |
| 44 | within studies     |                     | any outcome-level assessment (see Item 12).                   | 2          |
| 45 |                    |                     |                                                               |            |
| 46 |                    |                     |                                                               |            |
| 47 |                    |                     |                                                               |            |
| 48 | Results of         | <a href="#">#20</a> | For all outcomes considered (benefits and harms), present,    | NA         |
| 49 |                    |                     |                                                               |            |
| 50 | individual studies |                     | for each study: (a) simple summary data for each              |            |
| 51 |                    |                     |                                                               |            |
| 52 |                    |                     | intervention group and (b) effect estimates and confidence    |            |
| 53 |                    |                     | intervals, ideally with a forest plot.                        |            |
| 54 |                    |                     |                                                               |            |
| 55 |                    |                     |                                                               |            |
| 56 |                    |                     |                                                               |            |
| 57 |                    |                     |                                                               |            |
| 58 |                    |                     |                                                               |            |
| 59 |                    |                     |                                                               |            |
| 60 |                    |                     |                                                               |            |

|    |                   |                     |                                                                 |       |
|----|-------------------|---------------------|-----------------------------------------------------------------|-------|
| 1  | Synthesis of      | <a href="#">#21</a> | Present the main results of the review. If meta-analyses are    | 9-16  |
| 2  |                   |                     |                                                                 |       |
| 3  | results           |                     | done, include for each, confidence intervals and measures       |       |
| 4  |                   |                     |                                                                 |       |
| 5  |                   |                     | of consistency.                                                 |       |
| 6  |                   |                     |                                                                 |       |
| 7  |                   |                     |                                                                 |       |
| 8  |                   |                     |                                                                 |       |
| 9  | Risk of bias      | <a href="#">#22</a> | Present results of any assessment of risk of bias across        | 16    |
| 10 |                   |                     |                                                                 |       |
| 11 | across studies    |                     | studies (see Item 15).                                          |       |
| 12 |                   |                     |                                                                 |       |
| 13 |                   |                     |                                                                 |       |
| 14 | Additional        | <a href="#">#23</a> | Give results of additional analyses, if done (e.g., sensitivity | NA    |
| 15 |                   |                     |                                                                 |       |
| 16 | analysis          |                     | or subgroup analyses, meta-regression [see Item 16]).           |       |
| 17 |                   |                     |                                                                 |       |
| 18 |                   |                     |                                                                 |       |
| 19 | <b>Discussion</b> |                     |                                                                 |       |
| 20 |                   |                     |                                                                 |       |
| 21 |                   |                     |                                                                 |       |
| 22 | Summary of        | <a href="#">#24</a> | Summarize the main findings, including the strength of          | 17-18 |
| 23 |                   |                     |                                                                 |       |
| 24 | Evidence          |                     | evidence for each main outcome; consider their relevance        |       |
| 25 |                   |                     |                                                                 |       |
| 26 |                   |                     | to key groups (e.g., health care providers, users, and policy   |       |
| 27 |                   |                     |                                                                 |       |
| 28 |                   |                     | makers                                                          |       |
| 29 |                   |                     |                                                                 |       |
| 30 |                   |                     |                                                                 |       |
| 31 |                   |                     |                                                                 |       |
| 32 | Limitations       | <a href="#">#25</a> | Discuss limitations at study and outcome level (e.g., risk of   | 19    |
| 33 |                   |                     |                                                                 |       |
| 34 |                   |                     | bias), and at review level (e.g., incomplete retrieval of       |       |
| 35 |                   |                     |                                                                 |       |
| 36 |                   |                     | identified research, reporting bias).                           |       |
| 37 |                   |                     |                                                                 |       |
| 38 |                   |                     |                                                                 |       |
| 39 |                   |                     |                                                                 |       |
| 40 | Conclusions       | <a href="#">#26</a> | Provide a general interpretation of the results in the context  | 20    |
| 41 |                   |                     |                                                                 |       |
| 42 |                   |                     | of other evidence, and implications for future research.        |       |
| 43 |                   |                     |                                                                 |       |
| 44 |                   |                     |                                                                 |       |
| 45 | <b>Funding</b>    |                     |                                                                 |       |
| 46 |                   |                     |                                                                 |       |
| 47 |                   |                     |                                                                 |       |
| 48 | Funding           | <a href="#">#27</a> | Describe sources of funding or other support (e.g., supply of   | 20    |
| 49 |                   |                     |                                                                 |       |
| 50 |                   |                     | data) for the systematic review; role of funders for the        |       |
| 51 |                   |                     |                                                                 |       |
| 52 |                   |                     | systematic review.                                              |       |
| 53 |                   |                     |                                                                 |       |
| 54 |                   |                     |                                                                 |       |
| 55 |                   |                     |                                                                 |       |

Notes:



- 1 • 8: Supplement 1
- 2
- 3
- 4 • 18: Supplement 3
- 5
- 6
- 7 • 19: Supplement 2 The PRISMA checklist is distributed under the terms of the Creative Commons
- 8 Attribution License CC-BY. This checklist was completed on 26. August 2019 using
- 9 <https://www.goodreports.org/>, a tool made by the [EQUATOR Network](#) in collaboration with
- 10
- 11 [Penelope.ai](#)
- 12
- 13
- 14
- 15
- 16
- 17
- 18
- 19
- 20
- 21
- 22
- 23
- 24
- 25
- 26
- 27
- 28
- 29
- 30
- 31
- 32
- 33
- 34
- 35
- 36
- 37
- 38
- 39
- 40
- 41
- 42
- 43
- 44
- 45
- 46
- 47
- 48
- 49
- 50
- 51
- 52
- 53
- 54
- 55
- 56
- 57
- 58
- 59
- 60

# BMJ Open

## A Systematic Review of Patient Reported Outcome Measures (PROMs) in Cystic Fibrosis

|                                 |                                                                                                                                                                                                                                                                               |
|---------------------------------|-------------------------------------------------------------------------------------------------------------------------------------------------------------------------------------------------------------------------------------------------------------------------------|
| Journal:                        | <i>BMJ Open</i>                                                                                                                                                                                                                                                               |
| Manuscript ID                   | bmjopen-2019-033867.R2                                                                                                                                                                                                                                                        |
| Article Type:                   | Original research                                                                                                                                                                                                                                                             |
| Date Submitted by the Author:   | 14-Jul-2020                                                                                                                                                                                                                                                                   |
| Complete List of Authors:       | Ratnayake, Irushi; Monash University, Department of Epidemiology and Preventive Medicine<br>Ahern, Susannah; Monash University Department of Epidemiology and Preventive Medicine,<br>Ruseckaite, Rasa; Monash University, Department of Epidemiology and Preventive Medicine |
| <b>Primary Subject Heading</b>: | Respiratory medicine                                                                                                                                                                                                                                                          |
| Secondary Subject Heading:      | Epidemiology                                                                                                                                                                                                                                                                  |
| Keywords:                       | PUBLIC HEALTH, Cystic fibrosis < THORACIC MEDICINE, MENTAL HEALTH                                                                                                                                                                                                             |
|                                 |                                                                                                                                                                                                                                                                               |

SCHOLARONE™  
Manuscripts



I, the Submitting Author has the right to grant and does grant on behalf of all authors of the Work (as defined in the below author licence), an exclusive licence and/or a non-exclusive licence for contributions from authors who are: i) UK Crown employees; ii) where BMJ has agreed a CC-BY licence shall apply, and/or iii) in accordance with the terms applicable for US Federal Government officers or employees acting as part of their official duties; on a worldwide, perpetual, irrevocable, royalty-free basis to BMJ Publishing Group Ltd ("BMJ") its licensees and where the relevant Journal is co-owned by BMJ to the co-owners of the Journal, to publish the Work in this journal and any other BMJ products and to exploit all rights, as set out in our [licence](#).

The Submitting Author accepts and understands that any supply made under these terms is made by BMJ to the Submitting Author unless you are acting as an employee on behalf of your employer or a postgraduate student of an affiliated institution which is paying any applicable article publishing charge ("APC") for Open Access articles. Where the Submitting Author wishes to make the Work available on an Open Access basis (and intends to pay the relevant APC), the terms of reuse of such Open Access shall be governed by a Creative Commons licence – details of these licences and which [Creative Commons](#) licence will apply to this Work are set out in our licence referred to above.

Other than as permitted in any relevant BMJ Author's Self Archiving Policies, I confirm this Work has not been accepted for publication elsewhere, is not being considered for publication elsewhere and does not duplicate material already published. I confirm all authors consent to publication of this Work and authorise the granting of this licence.

1  
2  
3 **Title:** A Systematic Review of Patient Reported Outcome Measures (PROMs) in Cystic  
4 Fibrosis

5  
6 **Authors:** Irushi Ratnayake<sup>1</sup>, Susannah Ahern<sup>1</sup> PhD, Rasa Ruseckaite<sup>1</sup> PhD  
7  
8

9 **Author Affiliations:**

10  
11 <sup>1</sup>Department of Epidemiology and Preventive Medicine, Monash University, Melbourne,  
12  
13 Australia  
14

15  
16  
17 Corresponding author:

18 Rasa Ruseckaite

19  
20 Department of Epidemiology and Preventive Medicine, Monash University

21  
22 Address: 553 St Kilda Rd, Melbourne, VIC 3004, Australia

23  
24 Email: rasa.ruseckaite@monash.edu

25  
26 Telephone: +61 3 9903 0437  
27  
28  
29

30  
31 Word Count: Text 4398; Abstract 276  
32

33  
34 Keywords: patient reported outcome measure, PROM, health-related quality of life, cystic  
35 fibrosis  
36  
37  
38  
39  
40  
41  
42  
43  
44  
45  
46  
47  
48  
49  
50  
51  
52  
53  
54  
55  
56  
57  
58  
59  
60

## ABSTRACT

**Background:** To determine Patient Reported Outcome Measures (PROMs) which may be suitable for incorporation into the Australian Cystic Fibrosis Data Registry by identifying PROMs administered in adult and paediatric cystic fibrosis populations in the last decade.

**Methods:** We searched MEDLINE, EMBASE, Scopus, CINAHL, PsycINFO and Cochrane Library databases for studies published between January 2009 and February 2019 describing the use of PROMs to measure HRQOL in adult and paediatric patients with CF. Validation studies, observational studies and qualitative studies were included. The search was conducted on 13 February 2019. The COnsensus-based Standards for the selection of health Measurement INstruments (COSMIN) risk of bias checklist was used to assess the methodological quality of included studies.

**Results:** Twenty-seven different PROMs were identified. The most commonly used PROMs were designed specifically for CF. Equal numbers of studies were conducted on adult (32%, n=31), paediatric (35%, n=34) and both (27%, n=26) populations. No PROMs were used within a clinical registry setting previously. The two most widely used PROMs, the Cystic Fibrosis Questionnaire-Revised (CFQ-R) and the Cystic Fibrosis Quality of Life Questionnaire (CFQoL) demonstrated good psychometric properties and acceptability in English-speaking populations.

**Discussion:** We found that although PROMs are widely used in CF, there is a lack of reporting on the efficacy of methods and timepoints of administration. We identified the CFQ-R and CFQoL as most suitable for incorporation in the ACFDR as they captured significant effects of CF on HRQOL and were reliable and valid in CF populations. These PROMs will be used in a further qualitative study assessing CF patients' and clinicians' perspectives toward the acceptability and feasibility of incorporating a PROM in the ACFDR.

**PROSPERO registration:** CRD42019126931

## STRENGTHS AND LIMITATIONS OF THE STUDY

- Per our knowledge this is the first systematic review evaluating PROMs in adult and paediatric CF populations.
- This review involves a rigorous and extensive search of medical databases using clearly defined inclusion criteria and distinctly outlines how items will be selected and abstracted.
- The study assesses the most relevant and acceptable PROM for the context of a CF clinical registry.
- A limitation of this study is that the search was not conducted outside of medical databases, therefore may not capture studies examining PROM use in CF that are not published in peer reviewed journals.

## INTRODUCTION

Cystic Fibrosis (CF) has undergone significant changes in the last few decades. In the mid-1900s, the majority of CF patients did not survive beyond infancy. Now, over half of patients are adults<sup>1</sup> and life expectancy exceeds 40 in most developed countries.<sup>1</sup> The changing demographics of CF has led to new challenges in both disease management and clinical research. Treatment burden has increased<sup>2</sup> such that treatments currently require two to four hours a day.<sup>3</sup> The growing adult population encounters more difficulties balancing symptom and treatment burden of the disease with work, education or family demands.<sup>4, 5</sup> Therefore, there is an increasing requirement to examine and manage psychosocial impacts of CF.<sup>3</sup> Another challenge is posed by the relative healthiness of the modern CF population resulting in traditional endpoints in clinical trials, such as forced expiratory volume in one second (FEV1) and frequency of pulmonary exacerbations, having reduced sensitivity.<sup>6</sup>

A possible solution to these challenges is to monitor and collect data on health-related quality of life (HRQOL).<sup>7</sup> HRQOL is “an individual’s perception of their position in life in the context of the culture and value systems in which they live and in relation to their goals, expectations, standards and concerns”.<sup>8</sup> It encompasses physical health, social networks and relationships, psychological health, and functional capacity.<sup>8</sup> As HRQOL is subjective, it can be described using Patient-Reported Outcome Measures (PROMs).<sup>9</sup> PROMs are standardised sets of questions completed by patients without clinician interpretation.<sup>9</sup> PROMs have been used in a range of settings, from enhancing clinician-patient interaction to supporting health policy creation and economic analysis.<sup>10</sup> They are widely used in research; in observational studies to describe the impact of a disease on daily functioning, as tools for cost analysis of medical interventions<sup>2</sup> and the FDA have recommended HRQOL measures be used as outcomes in clinical trials.<sup>5</sup>

### **Australian Cystic Fibrosis Data Registry**

The Australian Cystic Fibrosis Data Registry (ACFDR) has been collecting data on Australian adults and children diagnosed with CF since 1998. In 2017 the ACFDR held records of 3151 patients,<sup>11</sup> estimated to be over 90% of Australia’s CF population.<sup>4</sup> The registry collects information on patients’ demographics, social functioning, physical health, treatments and mortality. In addition to increasing awareness about Australia’s CF population, the ACFDR has supported interventional and observational research and economic analysis.<sup>12</sup> The ACFDR enables national and international benchmarking<sup>12</sup> which has transformed models of care worldwide.<sup>4</sup>

PROMs evaluating HRQOL have been incorporated in Australian and international clinical registries.<sup>13-15</sup> In the US, PROM information is used to support observational studies which assess the association between patient demographics, disease burden and HRQOL.<sup>16</sup> In

1  
2  
3 Sweden, the national rheumatology registry enters its PROM data into a database to which  
4 patients and clinicians have access, so that patients are empowered to monitor their HRQOL  
5 and shared decision making is enhanced.<sup>15</sup> In Australia, PROMs evaluating HRQOL are  
6 currently incorporated in a number of state and national registries.<sup>17</sup> Information is used to  
7 monitor long term quality of life outcomes of treatments and complications,<sup>17</sup> to enable  
8 clinicians and health services to benchmark outcomes and ensure patient safety,<sup>14</sup> and to  
9 influence changes in clinical practice.<sup>14</sup>  
10  
11  
12  
13

14  
15 Integration of a PROM evaluating HRQOL into the ACFDR will reinforce the patient voice in  
16 data collection. PROMs in the ACFDR have the potential to be used for periodic review of  
17 aggregate HRQOL over time; to inform quality improvement for health services and  
18 clinicians; and for outcome measurement in registry-related clinical trials.<sup>10</sup> In order to fulfil  
19 these functions, any PROM selected for integration must be comprehensive in capturing all  
20 effects of CF on HRQOL. It must also have demonstrated good psychometric properties, be  
21 feasible to incorporate in ACFDR data collection and be acceptable to patients.  
22  
23  
24  
25

## 26 **AIMS**

27  
28 The primary aim of this review was to identify PROMs used in adult and paediatric CF  
29 populations, to determine any that may be suitable for incorporation into the ACFDR.  
30

31 Secondary aims were to examine:  
32

- 33 • Contexts in which PROMs are currently being used in CF (e.g. study design, setting);
- 34 • Methods of administration of PROMs (e.g. paper survey, electronic, interview, use of  
35 proxy-respondents);
- 36 • Assessed or stated psychometric properties of PROMs (e.g. reliability, validity,  
37 responsiveness);
- 38 • Acceptability of PROMs in adult and paediatric patient population.  
39  
40  
41  
42  
43  
44  
45  
46  
47  
48  
49  
50  
51  
52  
53  
54  
55  
56  
57  
58  
59  
60



## METHODS

A protocol for this systematic review was created following the Preferred Reporting Items for Systematic review and Meta-Analysis (PRISMA) guidelines.<sup>18</sup> The protocol was registered with PROSPERO (Registration number is CRD42019126931).

Eligibility and inclusion criteria are described in Table 1.

Table 1: Population, Intervention, Comparison, Outcome Research Strategy for Systematic Review

| PICO                | Description                                                                                                                                                                                                                                                                                                                                                                                                        |
|---------------------|--------------------------------------------------------------------------------------------------------------------------------------------------------------------------------------------------------------------------------------------------------------------------------------------------------------------------------------------------------------------------------------------------------------------|
| <b>Population</b>   | Adults and children with diagnosed CF                                                                                                                                                                                                                                                                                                                                                                              |
| <b>Intervention</b> | Articles describing PROMs used to assess HRQOL in CF.<br><br>Articles describing both generic and disease-specific measures will be included.                                                                                                                                                                                                                                                                      |
| <b>Comparison</b>   | Studies without a comparator will be considered for inclusion                                                                                                                                                                                                                                                                                                                                                      |
| <b>Outcome</b>      | Primary outcome measure is: <ul style="list-style-type: none"> <li>Identifying PROMs in CF population</li> </ul> Secondary outcome measures are: <ul style="list-style-type: none"> <li>Contexts in which PROMs have previously been used</li> <li>Administration methods of PROMs</li> <li>Assessed or stated validity and reliability of PROMs</li> <li>Acceptability of PROMs for patient population</li> </ul> |

### Inclusion criteria

Articles were included according to the following criteria:

- Study participants of all ages with a prior diagnosis of CF;
- Inpatients and outpatients;
- Study designs including quantitative (e.g. cohort, longitudinal, prospective, retrospective and validation) and qualitative studies (e.g. ethnography and case report)

## Exclusion criteria

Articles were excluded according to the following criteria:

- Published before January 2009;
- No article available in the English language;
- Conference abstracts;
- Editorials and reviews;
- Randomised Control Trials, as the same PROM was used for all and they provided limited additional information on secondary outcomes.

Reviewers searched MEDLINE, EMBASE, Scopus, CINAHL, PsycINFO and Cochrane Library databases on 13 February 2019. The search strategy was adapted to each database and included keywords: “*patient reported outcome*” OR “*patient reported outcome measure*” OR “*self-report*” OR “*questionnaire*” OR “*scale*” OR “*perception*” OR “*quality of life*” OR “*QOL*” AND “*cystic fibrosis*.” The search was restricted to English language, humans and last 10 years. Supplementary File 1 describes the search strategy for each database.

Initial screening involved a reviewer reading titles and abstracts of all studies identified by the search. Any studies that clearly did not meet the inclusion criteria were removed. Full texts of remaining studies were then read one author. Another author reviewed each stage of study selection. The numbers of studies at each stage of the search were recorded using the PRISMA flow diagram.

A data extraction form was constructed to summarise selected studies in line with the outcomes of the systematic review. Information extracted included: type of study, mean age of participants, setting PROM(s) administered, method of administration, time points administered PROM(s) used, type of PROM(s), psychometric properties of PROM(s) and acceptability of PROM(s) to patients.

The COnsensus-based Standards for the selection of health Measurement INstruments (COSMIN) risk of bias checklist was used to assess methodological quality of included studies. This tool was chosen as it was specifically created for studies using PROMs.<sup>19</sup> One reviewer appraised studies using the tool. Items were rated on a four point scale denoted as very good, adequate, doubtful or inadequate. Results were summarised into a table presenting the lowest score for each property.<sup>19</sup>

A descriptive synthesis of results was undertaken, organised thematically by type of PROM and assessing context, administration, acceptability and reliability of each measure. A meta-analysis was not performed as included studies assess different outcomes.

## RESULTS

### Search results

The search yielded 5671 results. The numbers at each stage are summarised in Figure 1. A final number of 91 studies were included in the review. The data extraction table is presented in Supplementary File 2.

[Figure 1]

### Contexts in which PROMs were used

A large proportion (80%, n=73) of studies identified were of observational study design. Validation studies were the next most frequent, making up 15% (n=14) of all studies. The search also identified two non-randomised control trials, two qualitative studies and one study describing development of a PROM. Similar numbers of studies were conducted on adults (34%, n=31), children (37%, n=34) or both (29%, n=26) age groups.

Most studies recruited patients from a CF outpatient clinic (61%, n=56). Other studies used patient populations from: RCT data (8%, n=7), inpatients (7%, n=6), longitudinal cohort study data (5%, n=5) and national databases (4%, n=4). No study was conducted using clinical registry data. In 48% (n=44) of studies, PROM instruments were used in cross-sectional observational studies to evaluate whether there was an association between HRQOL and physical factors (e.g. sleep, physical fitness), psychological factors (e.g. self-esteem, illness perception), social factors (e.g. stigma, employment status) or demographic factors (e.g. age, gender). Other reasons for utilising PROMs were to assess HRQOL in a population (18%, n=16) or validate PROMs (18%, n=16).

### Mode and method of administration

PROMs were commonly self-reported on paper in clinic for 19% (n=17) of studies. Many studies (14%, n=13) used multiple methods of administration e.g. paper and interview. Less commonly, data were collected using electronic methods for 8% (n=7) of studies. Many studies (55%, n=50) did not state mode or method of PROM administration.

For 43 studies conducted on young children below 13 years of age, the most common method of administration for 33% (n=14) was self-report using instruments specially designed for use in young children. Interviews were used in 28% (n=12) of studies and parents were used as proxy respondents in 23% (n=10) of studies completed on paediatric populations. When studies assessed the degree of agreement between child self-report and parent-proxies, they found variable results. While some studies found a high level of agreement in parent-child reports,<sup>20, 21</sup> others found that parents were better able to report HRQOL in observable domains, such as physical symptoms.<sup>22-25</sup> Two studies<sup>26, 27</sup> noted that parent-child agreement was better for younger children than older.

PROMs were administered once at the beginning of the study for the majority of studies (55%, n=50), which reflects the large proportion of cross-sectional studies. Several PROMs were administered twice (12%, n=11) and 15 (16%) studies applied PROMs longitudinally, between five to twelve times. The frequency of longitudinal administration varied from fortnightly<sup>28</sup> to 2 yearly.<sup>29</sup> Studies did not discuss the benefits of administering PROMs at their chosen frequencies. Dill et al.<sup>30</sup> applied the Cystic Fibrosis Questionnaire Revised (CFQ-R) every 3 months and found individual variation in each domain. This was not seen in a study that administered the EQ-5D every 8 weeks.<sup>31</sup> Abbott et al.<sup>32</sup> applied the Cystic Fibrosis Quality of Life Questionnaire (CFQoL) to the same patients over 12 years and observed a steady decrease of overall CFQoL score at 1% per year, which correlated with the decrease in FEV1%.

### **Acceptability**

Two studies assessing patient views towards PROMs found that parent caregivers were satisfied with the questionnaires.<sup>33, 34</sup> Salek et al.<sup>3</sup> observed that 76% of CF patients in their study would be willing to complete the CFQoL at every clinic visit. Overall, as most studies did not report the patient burden of PROMs to their patient populations, this review has found limited information on acceptability of PROMs for patients.

### **PROMs identified**

This review identified 27 different PROMs evaluating HRQOL. These were CF-specific, respiratory-specific, mental health-specific or generic. Some studies (25%, n=23) used two or more different PROMs. CF-Specific PROMs were used more commonly than other types. The most common instrument used was CFQ-R, used in 54% (n=49) of studies.

#### *CF-specific instruments*

Table 2 summarises the characteristics of CF-specific PROMs identified in this review.

Table 2: CF-specific PROMs

| PROM                                                                      | Studies Included | Year developed | Target population                                                                                          | Languages*                                                                                               | Number of items and domains                                                                                                                                                                                                                                                                     | Psychometric properties                                                                                                                                                                                                                                                                               |
|---------------------------------------------------------------------------|------------------|----------------|------------------------------------------------------------------------------------------------------------|----------------------------------------------------------------------------------------------------------|-------------------------------------------------------------------------------------------------------------------------------------------------------------------------------------------------------------------------------------------------------------------------------------------------|-------------------------------------------------------------------------------------------------------------------------------------------------------------------------------------------------------------------------------------------------------------------------------------------------------|
| Cystic Fibrosis Questionnaire - Revised <sup>28, 35-41</sup>              | 49               | 2003           | Teen/ adult (14+ years)<br>Adolescent (12-13 years)<br>Child (6-11 years)<br>Parent (Proxy for 6-13 years) | English<br>Polish<br>German<br>Hungarian<br>Dutch<br>Hindi<br>Portugese<br>Spanish<br>Swedish<br>Turkish | Number of Items:<br>Adult: 50<br>Adolescent: 35<br>Child: 35<br>Parent: 44<br><br>Domains: Physical, vitality, emotion, social, role/ school, body image, treatment burden, health perceptions, weight, respiratory, digestion                                                                  | Reliability: $\alpha > 0.7$ except treatment burden and social functioning domains in some studies<br><br>Test retest reliability** $> 0.6$<br><br>Validity: Known groups validity with FEV1, age and BMI.<br><br>Ceiling effects: Eating disturbances (46.4%), Body Image (39.6%), Digestion (37.2%) |
| Cystic Fibrosis Quality of Life Questionnaire <sup>3, 29, 32, 42-49</sup> | 14               | 2000           | Adult (14+ years)                                                                                          | English<br>Polish<br>Greek<br>Portugese                                                                  | Adult: 52<br><br>Domains: Physical, social, treatment, emotional, relationships, career, future, chest symptoms, body image                                                                                                                                                                     | Reliability: $\alpha: 0.72 - 0.95$<br><br>Test retest reliability $> 0.7$<br><br>Validity: All domains correlated with FEV2, sensitive to change over time                                                                                                                                            |
| Cystic Fibrosis Questionnaire <sup>27, 50-55</sup>                        | 7                | 1997           | Teen/ adult (14+ years)<br>Child (6-13 years)<br>Parent (Proxy for 6-13 years)                             | English<br>German<br>Dutch<br>Portugese                                                                  | Number of Items:<br>Adult: 48<br>Adolescent:<br>Child: 35<br>Parent: 44<br><br>Domains: Physical functioning, vitality, emotional state, social limitations, role/ school, body image, treatment constraints, embarrassment, eating disturbances, health status, weight, respiratory, digestion | Reliability: $\alpha=0.62 - 0.93$ for most domains in adult and child questionnaires<br><br>Validity: Some domains correlated with FEV1                                                                                                                                                               |

| PROM                                                     | Studies Included | Year developed | Target population                                                                          | Languages* | Number of items and domains                                                | Psychometric properties                                                                                                                          |
|----------------------------------------------------------|------------------|----------------|--------------------------------------------------------------------------------------------|------------|----------------------------------------------------------------------------|--------------------------------------------------------------------------------------------------------------------------------------------------|
| DISABKIDS-CFM <sup>34, 56</sup>                          | 2                | 2013           | Child (8-17 years)<br>Parent (Proxy for 8-17 years)                                        | Portuguese | Number of items: 10<br>Domains: Impact, Treatment                          | Reliability: $\alpha$ : 0.71 - 0.76<br>Validity: Good convergent and divergent validity assessed by MTMM<br>Ceiling effects: 27.5% impact domain |
| CF Symptom Diary <sup>57</sup>                           | 1                | 2009           | All ages                                                                                   | English    | Number of items: 16<br>Domains: Symptom, emotional impact, activity impact | Not reported                                                                                                                                     |
| Cystic Fibrosis Respiratory Symptom Diary <sup>26</sup>  | 1                | 2018           | CFRSD <sub>0-6</sub> (Proxy for 0-6 years)<br>CFRSD <sub>7-11</sub> (Proxy for 7-11 years) | English    | Number of items: 17<br>Domains: Respiratory signs, CF-related impacts      | Validity: Discriminates between sick and well CF patients                                                                                        |
| Res-CF <sup>58</sup>                                     | 1                | 2017           | Adult (18+)                                                                                | English    | Number of items: 4 (VAS)                                                   | Test retest reliability** > 0.7 for 3/4 items<br>Validity: Correlates with CFQ-R and responsive to changes in health                             |
| Cystic Fibrosis Symptom Progression Survey <sup>33</sup> | 1                | 2015           | Child (0-15 years, self-report and proxy)                                                  | Arabic     | Number of items: 10                                                        | Reliability: $\alpha$ = 0.76<br>Validity: Content validity demonstrated using factor analysis                                                    |

\* Languages included in this review

\*\*Test-retest reliability measured by intraclass correlation coefficient

MTMM: Multitrait multimethod matrix

1  
2  
3 CFQ-R was the most commonly used PROM in this review. It is widely used as it includes  
4 scales for children (6-11 years), adolescents (12-13 years), teens/adults (14+ years) and  
5 parents. This PROM is a revised version of the original Cystic Fibrosis Questionnaire  
6 (CFQ).<sup>38</sup> The CFQ was developed in France in 1997<sup>59</sup> and minor revisions were performed  
7 by Wenniger et al.<sup>60</sup> in 2003 due to inadequate psychometric properties found during  
8 validation of the German translation. The CFQ-R has been translated into 36 different  
9 languages.<sup>2</sup> Gancz et al.<sup>61</sup> reported that the CFQ-R was generally completed in 10-30  
10 minutes.  
11  
12

13  
14  
15  
16 Studies demonstrated generally good psychometric properties of the CFQ-R. When  
17 considering only the scales in English, internal consistency evaluated by Cronbach alpha  
18 ranged from 0.62 – 0.93<sup>36-38, 40</sup> for adult and child questionnaires and 0.55 – 0.75 for parent  
19 questionnaires.<sup>62</sup> Studies reported that the treatment burden, body image and school  
20 functioning domains were exceptions.<sup>25, 36, 38, 40</sup> Validity was demonstrated by the association  
21 between several CFQ-R domains and clinical parameters, in particular FEV1<sup>30, 38, 63-67</sup> and  
22 BMI (Body Mass Index).<sup>66, 67</sup> Longitudinal studies have shown that CFQ-R is sensitive to  
23 changes to HRQOL with antibiotic treatment<sup>35</sup> or over the course of a year.<sup>68</sup> Authors  
24 suggested it could predict survival<sup>42</sup> and be a determinant for lung transplantation.<sup>69</sup> Content  
25 validity was acceptable.<sup>25, 70</sup>  
26  
27

28  
29  
30  
31  
32 The CFQoL was the second most commonly used PROM. It has only been developed for  
33 adult populations. Salek et al.<sup>3</sup> found an average nine minute completion time and that the  
34 majority of patients found the instrument acceptable for completion in every clinic  
35 appointment. Studies identified in our search described robust psychometric properties of  
36 the CFQoL. Reliability measured by Cronbach alpha ranged from 0.72 – 0.95<sup>32, 45</sup> for all  
37 domains. It was correlated with generic measures, Short Form Questionnaire (SF36) and UK  
38 Sickness Impact Profile (UKSIP),<sup>3, 32</sup> and Schwachman-Kulczycki score, a clinician reported  
39 outcome measure.<sup>43</sup> Discriminant validity has been demonstrated by significantly worse  
40 CFQoL scores in CF patients than in controls.<sup>47</sup> Studies demonstrated correlation between  
41 CFQoL domains and FEV1,<sup>3, 32, 46</sup> however one study did not find a significant correlation.<sup>71</sup>  
42  
43

44  
45  
46  
47  
48  
49 Other CF specific PROMs identified included the CFQ, which was the first CF-specific  
50 PROM developed and has child, teen/adult and parent versions.<sup>38</sup> Studies demonstrated  
51 good internal consistency of most domains,<sup>55,27</sup> with the exception of treatment burden  
52 domain in all versions, social functioning domain in child and adult, and eating and digestion  
53 domains in adult and parent versions.<sup>27</sup> The DISABKIDS- CF Module, which was developed  
54 for children was used in two studies conducted in Brazil. Good internal consistency was  
55 demonstrated<sup>34, 56</sup> but one study found a ceiling effect and low test-retest reliability.<sup>56</sup> Several  
56 CF-specific PROMs were developed or initially validated during the last decade. These  
57  
58  
59  
60

1  
2  
3 included the CF Respiratory Symptom Diary (CFRSD),<sup>26</sup> CF Symptom Progression Survey  
4 (CF-SPS),<sup>33</sup> CF Symptom Diary<sup>57</sup> and the Respiratory Symptoms in CF (ReS-CF).<sup>58</sup>  
5  
6

### 7 *Respiratory specific PROMs*

8 Several HRQOL PROMs developed for chronic respiratory conditions were used in CF.  
9 These included the Leicester Cough Questionnaire (LCQ),<sup>58, 72</sup> St George's Respiratory  
10 Questionnaire (SGRQ),<sup>73, 74</sup> the Sinus and Nasal Quality of Life Survey (SN-5),<sup>75, 76</sup>, the Sino-  
11 Nasal Outcome Test (SNOT-22)<sup>77</sup> and the Liverpool Respiratory Symptom Questionnaire  
12 (LRSQ).<sup>6</sup> The SN-5 and SNOT-22 exclusively assess sinus symptoms.<sup>75-77</sup> The other  
13 respiratory PROMs, LCQ, SGRQ and LRSQ were originally piloted in patients with asthma<sup>78</sup>  
14 or chronic cough.<sup>79</sup> The LCQ, SGRQ and LRSS demonstrated acceptable reliability<sup>6, 58, 74</sup> and  
15 were found to correlate with CFQ-R domains<sup>58, 72</sup> and lung function tests.<sup>6, 73</sup> However, two  
16 studies found ceiling effects with the LCQ.<sup>58, 72</sup> Reliability of the SN-5 and SNOT-22 were not  
17 assessed, but SNOT-22 demonstrated floor effects<sup>77</sup> and the validity of SN-5 has not been  
18 assessed in CF.<sup>76</sup>  
19  
20  
21  
22  
23  
24  
25

### 26 *Mental health specific PROMs*

27 The most common mental health specific PROM identified was the Hospital Anxiety  
28 Depression Scale (HADS), which was used in eight observational studies in Europe and US.  
29 The instrument was reported to take 15 – 20 minutes to complete.<sup>48</sup> Studies found good  
30 reliability assessed by Cronbach alpha.<sup>36, 80</sup> Yohannes et al.<sup>48</sup> found good test-retest  
31 reliability and correlation with CFQoL. The HADS was used to show increased anxiety and  
32 depression in CF patients compared to the non-CF population.<sup>81</sup> Other HRQOL surveys  
33 focused on mental health identified were the Patient Health Questionnaire (PHQ-9), General  
34 Health Questionnaire (GHQ) and General Anxiety Disorder (GAD-7). Each was used in one  
35 study and found to have acceptable reliability,<sup>74, 82</sup> however validity was not assessed.  
36  
37  
38  
39  
40  
41  
42

### 43 *Generic Instruments*

44 Table 3 describes characteristics of generic instruments included in this study.  
45  
46  
47  
48  
49  
50  
51  
52  
53  
54  
55  
56  
57  
58  
59  
60



Table 3: Generic PROMs

| PROM                                                               | Number of Studies included | Year developed | Target population                                                               | Languages*                                                                             | Number of items and domains                                                                                                                                                                                               | Psychometric properties                                                                                          |
|--------------------------------------------------------------------|----------------------------|----------------|---------------------------------------------------------------------------------|----------------------------------------------------------------------------------------|---------------------------------------------------------------------------------------------------------------------------------------------------------------------------------------------------------------------------|------------------------------------------------------------------------------------------------------------------|
| EQ-5D <sup>21, 31, 52, 63, 83-85</sup>                             | 7                          | 1990           | EQ-5D-3L (16+)<br>EQ-5D-5L (16+)<br>EQ-5D-Y (8-15 years, self report and proxy) | English<br>French<br>German<br>Hungarian<br>Italian<br>Spanish<br>Swedish<br>Bulgarian | Number of items: 5<br><br>Domains: mobility, self-care, usual activities, pain/ discomfort, anxiety/depression                                                                                                            | Validity: Discriminates between CF and non-CF population<br><br>Ceiling effects: 44 - 67%                        |
| Paediatric Quality of Life Inventory <sup>20, 22, 23, 35, 86</sup> | 5                          | 1998           | Child (8-12 years, self report and proxy)                                       | English<br>Hungarian<br>Persian                                                        | Number of items: 23<br><br>Domains: Physical, Emotional, School, Social                                                                                                                                                   | Reliability: $\alpha = 0.68 - 0.93$<br><br>Validity: Discriminates between CF and asthma or non-CF population    |
| Short Form-36 <sup>42, 73, 74, 87</sup>                            | 4                          | 1990           | Adult (14+)                                                                     | English<br>German<br>Italian<br>Polish                                                 | Number of items: 36<br><br>Domains: Physical functioning, role-physical, role - emotional, bodily pain, general health, vitality, social functioning, mental health                                                       | Known groups validity with age and time after lung transplant<br><br>Ceiling effects up to 67.7% in some domains |
| UK Sickness Impact Profile <sup>3</sup>                            | 1                          | 1975           | Adult (18+)                                                                     | English                                                                                | Number of items: 136<br><br>Domains: Sleep and rest, eating, work, home management, recreation and pastimes, ambulation, mobility, body care, social interaction, alertness behaviour, emotional behaviour, communication | Reliability: $\alpha = 0.87 - 0.9$<br>Test retest reliability 0.57 - 0.84<br><br>Convergent validity with CFQoL  |

| PROM                                                          | Number of Studies included | Year developed | Target population  | Languages* | Number of items and domains                                                                                                           | Psychometric properties        |
|---------------------------------------------------------------|----------------------------|----------------|--------------------|------------|---------------------------------------------------------------------------------------------------------------------------------------|--------------------------------|
| World Health Organisation Quality of Life scale <sup>43</sup> | 1                          | 1996           | Adult (16+)        | Portugese  | Number of items: 26<br>Domains: Physical health, psychological, social relationships, environment                                     | Not reported                   |
| Single Item Scale <sup>48</sup>                               | 1                          | 2011           | Adult (18+)        | English    | Number of items: 1                                                                                                                    | Test retest reliability 0.78   |
| Quality of Life Profile for the Chronically Ill <sup>73</sup> | 1                          | 2000           | Adult (18+)        | German     | Number of items: 40<br>Domains: Physical capacity, psychological capacity, social capacity, psychological wellbeing, social wellbeing | Not reported                   |
| Core Outcome Measures <sup>37</sup>                           | 1                          | 1993           | Adult (16+)        | English    | Number of items: 34<br>Domains: Wellbeing, symptoms, functioning, risk                                                                | Convergent validity with CFQ-R |
| KINDL <sup>70</sup>                                           | 1                          | 1994           | Child (3-17 years) | Turkish    | Number of items: 40<br>Domains: psychosocial wellbeing, physical state, social relationships, functional capacity(76)                 | Convergent validity with CFQ-R |

\*Languages included in this review \*\*Test-retest reliability measured by intraclass correlation coefficient

1  
2  
3 The most common generic instrument was the EQ-5D questionnaire, which was developed  
4 to enable economic evaluations based on HRQOL scores. It has five dimensions and includes  
5 EQ-5D-3L version which has three response options, EQ-5D-5L version which has five  
6 response options, and EQ-5D-Y which has been designed for children and adolescents. All  
7 three versions of the PROM were utilised in this review<sup>21, 31, 52, 63, 83-85</sup> This review found EQ-  
8 5D-3L was reliable<sup>63</sup> and correlated with CFQ-R.<sup>84</sup> EQ-5D-5L distinguished HRQoL  
9 differences in CF and non-CF populations<sup>83</sup> and was sensitive to change during pulmonary  
10 exacerbation.<sup>84</sup> However, studies found a large proportion of patients reporting no problems  
11 with EQ-5D-3L and EQ-5D-Y,<sup>31, 52</sup> demonstrating that the PROMs may not be sensitive in  
12 collecting HRQOL data from CF patients.  
13

14  
15 A similar finding was observed in the Short Form Survey (SF-36), which was used in four  
16 European studies on adult populations.<sup>42, 47, 73, 74</sup> The instrument demonstrated robust  
17 psychometric properties; Cronbach alpha of 0.95<sup>74</sup> and discriminated between CF and non-  
18 CF populations.<sup>47, 74</sup> However Abbott et al.<sup>42</sup> found a high proportion of participants reporting  
19 no problems and that the instrument was less sensitive to clinical deterioration than the  
20 CFQoL.  
21

22  
23 The Paediatric Quality of Life Inventory (PedsQL) is a generic HRQOL instrument developed  
24 for children with paediatric cancers.<sup>88</sup> The PedsQL demonstrated good internal  
25 consistency,<sup>20</sup> discriminant validity comparing asthma and CF and correlated with BMI.<sup>35</sup>  
26 Other generic HRQOL PROMs described in adult populations were the World Health  
27 Organisation Quality Of Life scale (WHOQOL-BREF),<sup>43</sup> Core Outcome Measures tool  
28 (CORE-OM),<sup>37</sup> United Kingdom Sickness Impact Profile (UKSIP),<sup>3</sup> KINDL and the Quality of  
29 Life Profile for the Chronically Ill (PLC).<sup>73</sup> These instruments were each used in one  
30 observational study. Psychometric properties were not evaluated in included studies.  
31

### 32 **Risk of Bias**

33  
34 The COSMIN Risk of Bias checklist is designed to critically appraise studies evaluating the  
35 reliability or validity of PROMs. A number of studies in this review did not validate  
36 instruments for their study population and relied on previous reliability and validity statistics  
37 for the PROM used. Therefore, these studies were not critically appraised. The results of  
38 critical appraisal are summarised in Supplementary File 3.  
39

40  
41 Critically appraising articles using the COSMIN checklist enables reviewers to discern  
42 whether psychometric properties have been evaluated using appropriate methodology. From  
43 this, reviewers can determine whether the information reported on psychometric properties  
44 of PROMs is trustworthy. For example, the second most commonly evaluated property  
45 'Internal Consistency' frequently received optimal scores, demonstrating that researchers  
46  
47  
48  
49  
50  
51  
52  
53  
54  
55  
56  
57  
58  
59  
60

1  
2  
3 were in line with COSMIN recommendations and that 'Internal Consistency' reported is  
4 generally reliable. However, the most commonly reported property 'Hypothesis Testing for  
5 Construct Validity' received variable scores, demonstrating a lack of reliability in interpreting  
6 this statistic.  
7  
8

## 9 10 **DISCUSSION**

### 11 **Contexts in which PROMs were used**

12 This review identified that PROMs are used in a variety of settings in CF. PROMs were most  
13 commonly used in observational studies, where they assessed the impact of physical,  
14 psychological, social or demographic variables on HRQOL. This review did not find studies  
15 describing implementation of a PROM in a clinical registry or which used clinical registry  
16 data.  
17  
18

19 Some studies were developing PROMs or undertaking validation of new PROMs. This may  
20 suggest that existing PROMs are not meeting researchers' requirements. Limitations of  
21 existing PROMs may include the length of commonly used CF-specific PROMs, which could  
22 reduce patient compliance and increase data entry burden. Newly developed CF-specific  
23 PROMs identified in this study were substantially shorter,<sup>33, 49, 58</sup> demonstrating that  
24 researchers require less burdensome CF-specific PROMs. Another limitation may be  
25 inadequacy of paediatric measures as currently, no validated PROMs exists to measure data  
26 in 0-6 year olds.<sup>26</sup> This review identified researchers validating or developing PROMs for  
27 younger patient populations.<sup>26, 33, 56</sup>  
28  
29

### 30 **Mode and methods of administration**

31 The mode of administration of the selected PROM will be a major determinant of patient  
32 adherence and completion rates<sup>9</sup>. Studies in this review used paper based methods most  
33 frequently. However, electronic or online administration is reported to have higher patient  
34 adherence,<sup>9</sup> avoid the need for manual data entry and be more cost effective in the long  
35 term than paper methods.<sup>8<sup>9</sup></sup>  
36  
37

38 For paediatric populations, the most common method of administration was self-reporting,  
39 using instruments specially designed for use in children. Proxy reporting was uncommon and  
40 studies investigating the consistency of parent and child results found that it was better for  
41 observable symptoms<sup>22-25</sup> and younger children.<sup>26, 27</sup> Edwards et al.<sup>26</sup> hypothesised this  
42 finding was because parents are more involved in care for younger children and therefore  
43 have a better understanding of their HRQOL.  
44  
45

46 This review demonstrated the advantages of longitudinal PROM collection, as associations  
47 between physical and sociodemographic characteristics and quality of life were seen in  
48 studies undertaken over a decade,<sup>29, 32</sup> which weren't seen over 12 or 18 month periods.<sup>30</sup>  
49  
50  
51  
52  
53  
54  
55  
56  
57  
58  
59  
60

1  
2  
3 However, where PROMs captured longitudinally, there was a range of frequencies of  
4 administration, demonstrating a lack of consensus on the most appropriate time required  
5 between PROM administration. Studies generally did not report information on the  
6 effectiveness of the frequency of administration in demonstrating changes in HRQOL.  
7  
8 Further evaluation of the most useful and acceptable time points of administration must be  
9 conducted prior to incorporation of a PROM into the ACFDR.  
10  
11  
12

### 13 **PROMs identified**

14 Our review identified that PROMs developed specifically for CF are more commonly used for  
15 CF patients than generic PROMs. Generic PROMs, which ask about health domains  
16 relevant to everyone, have the advantage of applicability across all populations.<sup>14</sup> Therefore,  
17 they were used to compare different diseases and in cost-analysis and resource allocation  
18 decisions.<sup>21, 83</sup> CF-specific PROMs include an assessment of CF symptoms that are not  
19 relevant in non-CF populations,<sup>14</sup> therefore have comparatively limited uses in health policy.  
20 However, this review found that CF-specific PROMs are more responsive to changes in  
21 health<sup>9</sup> and better correlated to clinical parameters<sup>22, 90</sup> compared to generic PROMs.  
22 Significant ceiling effects found using EQ-5D<sup>31</sup> or SF-36<sup>42</sup> suggest these generic instruments  
23 are not capturing problems faced by the CF population. Specific PROMs can therefore give  
24 more clinically relevant information than generic<sup>2, 9</sup> and better compare outcomes within CF  
25 populations.<sup>91</sup>  
26  
27  
28  
29  
30  
31  
32  
33

34 A number of symptom-specific PROMs were identified in our review that focused on  
35 respiratory symptoms or mental health. As CF affects all four domains of HRQOL, physical  
36 health, psychological health, social relationships and functional capacity, the use of these  
37 symptom-specific PROMs will not provide the comprehensive assessment of HRQOL  
38 required by the ACFDR. While it is important to assess depression and anxiety in CF,  
39 evaluating only these symptoms may give a limited understanding of the effect of CF on  
40 overall HRQOL.  
41  
42  
43  
44  
45

### 46 **Choosing a PROM for the ACFDR**

47 The ACFDR was established to facilitate varying research methodologies and impart  
48 accurate information on the current outcomes of Australia's CF population.<sup>4</sup> One of its key  
49 functions, providing feedback of outcomes for clinicians and health services, is critical for the  
50 ongoing improvement of care.<sup>92</sup> The inclusion of CF-specific domains in the chosen tool is  
51 therefore essential, as these domains will be most directly affected by changes in treatment  
52 and therefore will be the most useful information to feedback to clinicians. Similarly, CF  
53 symptom information will be relevant for pharmaceutical companies or researchers following  
54 up the long-term outcomes of treatment and complications. In addition, ensuring that PROM  
55  
56  
57  
58  
59  
60

1  
2  
3 data captures all aspects of HRQOL will enable it to be widely used in research. Therefore, it  
4 is most appropriate to include a CF-specific PROM.  
5

6  
7 After evaluating PROMs based on the predetermined criteria for incorporation into the  
8 ACFDR; comprehensiveness, robust psychometric properties, feasibility and acceptability,  
9 the CFQ-R and CFQoL come closest to achieving this criteria. They are comprehensive as  
10 they include both general and CF-specific domains. This review establishes satisfactory  
11 psychometric properties for these two instruments.  
12  
13

14  
15 A major limitation to incorporating either PROM into the ACFDR is the length of the  
16 instruments, which may dissuade patients from participating in data collection or completing  
17 the instrument. This poses a difficulty, as a large amount of missing data may cause  
18 collection of PROM data to become ineffectual. However, if patients believe that measuring  
19 HRQOL is useful to them, they may complete the instrument regardless of its length. At the  
20 Duke Cancer Institute in US, patients in solid tumour clinics have less than 5% missing data  
21 for a survey with median completion time of 11 minutes.<sup>90</sup> Communication of the beneficial  
22 outcomes to patients, clinicians and researchers of HRQOL data collection may influence  
23 patients to regard completing the instrument as important to them.  
24  
25

26  
27 Both selected CF PROM tools are also the oldest specific instruments developed in CF.<sup>93, 94</sup>  
28 There is a possibility of longevity bias if these PROMs are most commonly used in CF  
29 because they are well-known, rather than superior instruments. Another concern is that as  
30 the demographics and outcomes of CF have changed considerably since these instruments  
31 were first developed, their relevance to the current population may be limited. In addition, the  
32 PROM selected for the ACFDR must also be applicable to future populations, so that registry  
33 data collection remains consistent.<sup>90</sup> However, both the CFQ-R and CFQoL demonstrated  
34 the most robust psychometric properties of all the PROMs and recent studies that used  
35 these instruments reported no requirement for modification,<sup>28, 46, 86, 95</sup> so it can be concluded  
36 they are currently relevant to the CF population.  
37  
38

### 39 **Limitations of the review**

40  
41 This systematic review has several limitations. Researchers did not conduct a grey literature  
42 search, which may have limited information on the use of PROMs in registries. However, it  
43 may also occur because there is limited reporting on PROM incorporation in CF registries.  
44 Researchers excluded randomised controlled trials (RCTs) from this review, which limited  
45 our results on the extent of PROM use in CF research. Initial searches for this topic identified  
46 that RCTs only used the CFQ-R and did not report administration methods or psychometric  
47 properties of PROMs. Therefore, we felt that excluding RCTs enabled a focus on  
48  
49  
50  
51  
52  
53  
54  
55  
56  
57  
58  
59  
60

1  
2  
3 observational studies, which have data collection methods more closely resembling clinical  
4 registries and included more information on secondary outcomes of this study.  
5

6  
7 Another limitation is the lack of information identified on the views of CF patients and  
8 caregivers on the relevance of PROMs, their clarity and structure, ease of use and whether  
9 completing PROMs was emotionally burdensome. Researchers found very few studies  
10 reported data on acceptability, such as response rates, administration time or qualitative  
11 perspectives of patients or caregivers on PROMs. Therefore, limited information on that  
12 outcome is described in this review. This information is important because symptoms and  
13 treatments are already emotionally and physically demanding, therefore a time-consuming  
14 and difficult questionnaire should not be imposed on patients. In addition, giving a  
15 questionnaire that is meaningful to patients and clinicians is essential to ensure compliance  
16 and guarantee complete data collection.  
17  
18  
19  
20  
21  
22

23 In order to overcome these limitations, researchers will conduct a further feasibility and  
24 acceptability study to identify patient and clinician perspectives toward incorporation of either  
25 the CFQ-R or CFQoL into the ACFDR.  
26  
27  
28

## 29 **CONCLUSION**

30 This review aimed to identify whether existing HRQOL instruments are suitable for  
31 incorporation in the registry and to gain an understanding of the use of PROMs in CF. We  
32 found that PROMs are widely used in CF, but there is a lack of reporting on methods of  
33 administration and time points. We have identified two PROMs appropriate for ACFDR that  
34 will be used in a further qualitative study of CF patients and clinicians, to gain their  
35 perspectives on the instruments and the feasibility of incorporating a PROM into the ACFDR.  
36  
37  
38  
39

40 **Funding:** No funding received.  
41

42 **Competing interests:** None declared.  
43

44 **Patient and Public Involvement:** It was not possible to include patients or the public in this  
45 study.  
46

47 **Data Availability:** Additional data are available upon reasonable request.  
48

49 **Author contributions:** All authors (IR, SA and RR) developed the protocol for this  
50 systematic review. IR conducted the screening of studies, data extraction and critical  
51 appraisal. RR reviewed each stage of study selection. All authors assisted in the  
52 interpretation and write up of results. All authors approved the final version to be published.  
53  
54  
55  
56  
57  
58  
59  
60

## REFERENCES

1. Quittner AL, Saez-Flores E, Barton JD. The psychological burden of cystic fibrosis. *Curr Opin Pulm Med* 2016;22(2):187-91.
2. Ratjen F, Bell SC, Rowe SM et al. Cystic fibrosis. *Nat Rev Dis Primers* 2015;1:15010. doi:10.1038/nrdp.2015.10.
3. Salek MS, Jones S, Rezaie M, et al. Do patient-reported outcomes have a role in the management of patients with cystic fibrosis? *Front Pharmacol* 2012;3. <https://www.ncbi.nlm.nih.gov/pmc/articles/PMC3298894/> (accessed 20 Mar 2019) doi: 10.3389/fphar.2012.00038
4. Bell SC, Bye PTP, Cooper PJ, et al. Cystic fibrosis in Australia, 2009: results from a data registry. *Med J Aust* 2011;195(7):396-400.
5. Royce FH, Carl JC. Health-related quality of life in cystic fibrosis. *Curr Opin Pediatr* 2011;23(5):535-40. doi: 10.1097/MOP.0b013e32834a7829
6. Trinick R, Southern KW, McNamara PS. Assessing the Liverpool Respiratory Symptom Questionnaire in children with cystic fibrosis. *Eur Respir J*. 2012;39(4):899-905. doi: 10.1183/09031936.00070311
7. Elborn JS. Cystic fibrosis. *The Lancet* 2016;388(10059):2519-31. doi: [https://doi.org/10.1016/S0140-6736\(16\)00576-6](https://doi.org/10.1016/S0140-6736(16)00576-6)
8. World Health Organisation. WHOQOL-BREF : introduction, administration, scoring and generic version of the assessment: field trial version, December 1996. Geneva; World Health Organisation; 1996.
9. Blackwell LS, Marciel KK, Quittner AL. Utilization of patient-reported outcomes as a step towards collaborative medicine. *Paediatr Respir Rev* 2013;14(3):146-51.
10. Williams K, Sansoni J, Morris D. Patient-reported outcome measures: Literature review. Sydney; Australian Commission for Safety and Quality in Health Care; 2016
11. Ruseckaite R, Ahern S, Ranger T et al. Australian Cystic Fibrosis Data Registry Annual Report, 2017. Melbourne; Monash University Department of Epidemiology and Preventive Medicine; 2019
12. Ahern S, Sims G, Earnest A, S CB. Optimism, opportunities, outcomes: the Australian Cystic Fibrosis Data Registry. *Intern Med J* 2018;48(6):721-3.
13. Devlin N, Appleby J, Buxton M, et al. Getting the most out of PROMs. London; The King's Fund; 2010
14. Collecting Patient Reported Outcomes Measures in Victoria Consultation Paper. Melbourne; Department of Health and Human Services; 2016
15. Nelson EC, Eftimovska E, Lind C, et al. Patient Reported Outcome Measures in Practice. *BMJ* 2015;350. [www.jstor.org/stable/26518240](http://www.jstor.org/stable/26518240) (accessed 8 Apr 2019) doi: 10.1136/bmj.g7818
16. Weitzman ER, Wisk LE, Salimian PK, et al. Adding patient-reported outcomes to a multisite registry to quantify quality of life and experiences of disease and treatment for youth with juvenile idiopathic arthritis. *J Patient Rep Outcomes*. 2018;2(1). <https://link.gale.com/apps/doc/A554974377/AONE?u=monash&sid=AONE&xid=3b2bd1a0> (accessed 8 Apr 2019) doi: <http://dx.doi.org.ezproxy.lib.monash.edu.au/10.1186/s41687-017-0025-2>
17. Thompson C, Sansoni J, Morris D, et al. Patient-reported Outcome Measures: An environmental scan of the Australian healthcare sector. Sydney; Australian Commission on Safety and Quality in Health Care; 2016
18. Moher D, Shamseer L, Clarke M, et al. Preferred reporting items for systematic review and meta-analysis protocols (PRISMA-P) 2015 statement. *Syst Rev* 2015;4(1):1. doi: <http://dx.doi.org.ezproxy.lib.monash.edu.au/10.1186/2046-4053-4-1>
19. Morkink LB, Terwee CB, Patrick DL, et al. COSMIN checklist manual. *Qual Life Res* 2018;27(5):1171-1179. doi: 10.1007/s1136-017-1765-4 [Published Online First: 19 December 2017]
20. Bodnar R, Kadar L, Szabo L, et al. Health Related Quality of Life of Children with Chronic Respiratory Conditions. *Adv Clin Exp Med*. 2015;24(3):487-95. doi: 10.17219/acem/24991



21. Chevreul K, Berg Brigham K, Michel M, et al. Costs and health-related quality of life of patients with cystic fibrosis and their carers in France. *J Cyst Fibros* 2015;14(3):384-91. doi: <http://dx.doi.org/10.1016/j.jcf.2014.11.006>
22. Driscoll KA, Modi AC, Filigno SS, et al. Quality of life in children with CF: Psychometrics and relations with stress and mealtime behaviors. *Pediatr Pulmonol* 2015;50(6):560-7. doi: 10.1002/ppul.23149
23. Kianifar HR, Bakhshoodeh B, Hebrani P, et al. Quality of Life in Cystic Fibrosis Children. *Iran J Pediatr* 2013;23(2):149-53.
24. Kir D, Gupta S, Jolly G, et al. Health Related Quality of Life in Indian Children with Cystic Fibrosis. *Indian Pediatr* 2015;52(5):403-8.
25. Schmidt A, Wenninger K, Niemann N, et al. Health-related quality of life in children with cystic fibrosis: validation of the German CFQ-R. *Health Qual Life Outcomes* 2009;7:97. doi: 10.1186/1477-7525-7-97
26. Edwards TC, Emerson J, Genatossio A, et al. Initial development and pilot testing of observer-reported outcomes (ObsROs) for children with cystic fibrosis ages 0-11 years. *J Cyst Fibros* 2018;17(5):680-6. doi: <https://doi.org/10.1016/j.jcf.2017.12.008>
27. Tluczek A, Becker T, Grieve A, et al. Health-related quality of life in children and adolescents with cystic fibrosis: convergent validity with parent-reports and objective measures of pulmonary health. *J Dev Behav Pediatr* 2013;34(4):252-61.
28. Flume PA, Suthoff ED, Kosinski M, et al. Measuring recovery in health-related quality of life during and after pulmonary exacerbations in patients with cystic fibrosis. *J Cyst Fibros*. 2018. <https://www.sciencedirect-com.ezproxy.lib.monash.edu.au/science/article/pii/S1569199318309421> [accessed 25 Mar 2019] doi: <https://doi.org/10.1016/j.jcf.2018.12.004>
29. Abbott J, Morton AM, Hurley MA, et al. Longitudinal impact of demographic and clinical variables on health-related quality of life in cystic fibrosis. *BMJ Open* 2015;5(5):e007418. [https://bmjopen.bmj.com/content/5/5/e007418?utm\\_source=trendmd&utm\\_medium=cpc&utm\\_campaign=bmjopen&trendmd-shared=1&utm\\_content=Journalcontent&utm\\_term=TrendMDPhase4](https://bmjopen.bmj.com/content/5/5/e007418?utm_source=trendmd&utm_medium=cpc&utm_campaign=bmjopen&trendmd-shared=1&utm_content=Journalcontent&utm_term=TrendMDPhase4) [accessed 20 Mar 2019] doi:10.1136/bmjopen-2014-007418
30. Dill EJ, Dawson R, Sellers DE, et al. Longitudinal trends in health-related quality of life in adults with cystic fibrosis. *Chest* 2013;144(3):981-9. doi: 10.1378/chest.12-1404
31. Solem CT, Vera-Llonch M, Liu S, et al. Impact of pulmonary exacerbations and lung function on generic health-related quality of life in patients with cystic fibrosis. *Health Qual Life Outcomes* 2016;14:63. doi: 10.1186/s12955-016-0465-z
32. Abbott J, Hurley MA, Morton AM, et al. Longitudinal association between lung function and health-related quality of life in cystic fibrosis. *Thorax* 2013;68(2):149-54. doi:10.1136/thoraxjnl-2012-202552
33. Norrish C, Norrish M, Fass U, et al. The Cystic Fibrosis Symptom Progression Survey (CF-SPS) in Arabic: A Tool for Monitoring Patients' Symptoms. *Oman Med J* 2015;30(1):17-25.
34. de Souza Serio dos Santos DM, Deon KC, Fegadolli C, et al. Cultural adaptation and initial psychometric properties of the DISABKIDS®- Cystic Fibrosis Module - Brazilian version. *Rev Esc Enferm USP* 2013;47(6):1311-7 doi: 10.1590/S0080-623420130000600009
35. Modi AC, Lim CS, Driscoll KA, et al. Changes in pediatric health-related quality of life in cystic fibrosis after IV antibiotic treatment for pulmonary exacerbations. *J Clin Psychol Med Settings*. 2010;17(1):49-55.
36. Oliver KN. Longitudinal study of perceived stigma, disclosure, and optimism in adolescents and adults living with cystic fibrosis: Measuring the impact on psychological and physical health. Dissertation Abstracts International: Section B: The Sciences and Engineering. 2016;76(11-B(E)):No Pagination Specified.
37. Platten MJ, Newman E, Quayle E. Self-esteem and its relationship to mental health and quality of life in adults with cystic fibrosis. *J Clin Psychol Med Settings* 2013;20(3):392-9 doi: 10.1007/s10880-012-9346-8

- 1  
2  
3 38. Quittner AL, Sawicki GS, McMullen A, et al. Erratum to: Psychometric evaluation of the Cystic  
4 Fibrosis Questionnaire-Revised in a national, US sample. *Qual Life Res* 2012;21(7):1279-90. doi:  
5 10.1007/s11136-011-0091-5  
6  
7 39. Sole A, Oliveira C, Perez I, et al. Development and electronic validation of the revised Cystic  
8 Fibrosis Questionnaire (CFQ-R Teen/Adult): New tool for monitoring psychosocial health in CF. *J Cyst*  
9 *Fibros* 2018;17(5):672-9. doi: <https://doi.org/10.1016/j.jcf.2017.10.015>  
10  
11 40. Simon SL, Duncan CL, Horky SC, et al. Body satisfaction, nutritional adherence, and quality of  
12 life in youth with cystic fibrosis. *Pediatr Pulmonol* 2011;46(11):1085-92. [https://onlinelibrary-wiley-](https://onlinelibrary-wiley-com.ezproxy.lib.monash.edu.au/doi/full/10.1002/ppul.21477)  
13 [com.ezproxy.lib.monash.edu.au/doi/full/10.1002/ppul.21477](https://onlinelibrary-wiley-com.ezproxy.lib.monash.edu.au/doi/full/10.1002/ppul.21477) [accessed 25 Mar 2019] doi:  
14 10.1002/ppul.21477  
15  
16 41. Schmidt AM, Jacobsen U, Bregnballe V, et al. Exercise and quality of life in patients with  
17 cystic fibrosis: A 12-week intervention study. *Physiother* 2011;27(8):548-56. doi:  
18 10.3109/09593985.2010.545102  
19  
20 42. Abbott J, Hart A, Morton AM, et al. Can health-related quality of life predict survival in adults  
21 with cystic fibrosis? *Am J Respir Crit Care Med* 2009;179(1):54-8.  
22  
23 43. Forte GC, Barni GC, Perin C, et al. Relationship Between Clinical Variables and Health-Related  
24 Quality of Life in Young Adult Subjects With Cystic Fibrosis. *Respir Care* 2015;60(10):1459-68. doi:  
25 10.4187/respcare.03665  
26  
27 44. Kelemen L, Lee AL, Button BM, et al. Pain impacts on quality of life and interferes with  
28 treatment in adults with cystic fibrosis. *Physiother Res Int* 2012;17(3):132-41. doi: 10.1002/pri.524  
29  
30 45. Stofa M, Xanthos T, Ekmektzoglou K, et al. Quality of life in adults with cystic fibrosis: the  
31 Greek experience. *Pneumonol Alergol Pol* 2016;84(4):205-11 doi: 10.5603/PiAP.2016.0025  
32  
33 46. Tomaszek L, Debska G, Cepuch G, et al. Evaluation of quality of life predictors in adolescents  
34 and young adults with cystic fibrosis. *Heart and Lung* 2018;48(2):159-165 doi:  
35 <https://doi.org/10.1016/j.hrtlng.2018.08.003>  
36  
37 47. Uchmanowicz I, Jankowska-Polanska B, Rosinczuk J, et al. Health-related quality of life of  
38 patients suffering from cystic fibrosis. *Adv* 2015;24(1):147-52 doi: 10.17219/acem/38147  
39  
40 48. Yohannes AM, Dodd M, Morris J, et al. Reliability and validity of a single item measure of  
41 quality of life scale for adult patients with cystic fibrosis. *Health Qual Life Outcomes* 2011;9:105.  
42  
43 49. Yohannes AM, Willgoss TG, Fatoye FA, et al. Relationship between anxiety, depression, and  
44 quality of life in adult patients with cystic fibrosis. *Respir Care* 2012;57(4):550-6. doi:  
45 10.4187/respcare.01328  
46  
47 50. Aguiar KCA, Marson FAL, Gomez CCS, et al. Physical performance, quality of life and sexual  
48 satisfaction evaluation in adults with cystic fibrosis: An unexplored correlation. *Rev Port Pneumol*  
49 2017;23(4):179-92. doi: <http://dx.doi.org/10.1016/j.rppnen.2017.02.00>  
50  
51 51. Cohen MA, Ribeiro MA, Ribeiro AF, et al. Quality of life assessment in patients with cystic  
52 fibrosis by means of the Cystic Fibrosis Questionnaire. *J Bras Pneumol* 2011;37(2):184-92.  
53  
54 52. Eidt-Koch D, Mittendorf T, Greiner W. Cross-sectional validity of the EQ-5D-Y as a generic  
55 health outcome instrument in children and adolescents with cystic fibrosis in Germany. *BMC Pediatr*  
56 2009;9:55 doi: 10.1186/1471-2431-9-55  
57  
58 53. Shoff SM. Nutritional status and quality of life in children with CF aged 9 to 19 years. *Pediatr*  
59 *Pulmonol* 2014;38):174-6 doi: <http://dx.doi.org/10.1016/j.jcf.2013.01.00>  
60  
61 54. Tibosch MM, Sintnicolaas CJ, Peters JB, et al. How about your peers? Cystic fibrosis  
62 questionnaire data from healthy children and adolescents. *BMC Pediatr* 2011;11:86 doi:  
63  
64 55. Tluczek A, Becker T, Laxova A, et al. Relationships among health-related quality of life,  
65 pulmonary health, and newborn screening for cystic fibrosis. *Chest* 2011;140(1):170-7. doi:  
66 10.1378/chest.10-1504  
67  
68 56. de Souza Serio dos Santos DM, Deon KC, Bullinger M, et al. Validity of the DISABKIDS® -  
69 Cystic Fibrosis Module for Brazilian children and adolescents. *Rev Lat Am Enfermagem*  
70 2014;22(5):819-25 doi: 10.1590/0104-1169.3450.2485

- 1
- 2
- 3 57. Goss CH, Edwards TC, Ramsey BW, et al. Patient-reported respiratory symptoms in cystic
- 4 fibrosis. *J Cyst Fibros* 2009;8(4):245-52 doi: doi:10.1016/j.jcf.2009.04.003
- 5
- 6 58. Ward N, Stiller K, Rowe H, et al. The psychometric properties of the Leicester Cough
- 7 Questionnaire and Respiratory Symptoms in CF tool in cystic fibrosis: A preliminary study. *J Cyst*
- 8 *Fibros* 2017;16(3):425-32 doi: <http://dx.doi.org/10.1016/j.jcf.2016.11.011>
- 9
- 10 59. Henry B, Aussage P, Grosskopf C, et al. Measuring Quality of Life in Children with Cystic
- 11 Fibrosis: The Cystic Fibrosis Questionnaire (CFQ). *Qual Life Res* 1997;6(7/8):657.
- 12
- 13 60. Wenninger K, Aussage P, Wahn U, et al. The Revised German Cystic Fibrosis Questionnaire"
- 14 Validation of a Disease-specific Health-related Quality of Life Instrument. *Qual Life Res*
- 15 2003;12(1):77-85
- 16
- 17 61. Gancz DW, Cunha MT, Leone C, et al. Quality of life amongst adolescents and young adults
- 18 with cystic fibrosis: correlations with clinical outcomes. *Clinics* 2018;73:e427.
- 19
- 20 62. Alpern AN, Brumback LC, Ratjen F, et al. Initial evaluation of the Parent Cystic Fibrosis
- 21 Questionnaire--Revised (CFQ-R) in infants and young children. *J Cyst Fibros* 2015;14(3):403-11. doi:
- 22 <http://dx.doi.org/10.1016/j.jcf.2014.11.002>
- 23
- 24 63. Acaster S, Pinder B, Mukuria C, et al. Mapping the EQ-5D index from the cystic fibrosis
- 25 questionnaire-revised using multiple modelling approaches. *Health Qual Life Outcomes* 2015;13:33
- 26 doi: 10.1186/s12955-015-0224-6
- 27
- 28 64. Cronly J, Duff A, Riekert K, et al. Positive mental health and wellbeing in adults with cystic
- 29 fibrosis: A cross sectional study. *J Psychosom Res* 2019;116:125-30. doi:
- 30 <https://doi.org/10.1016/j.jpsychores.2018.11.016>
- 31
- 32 65. Hochwalder J, Bergsten Brucefors A, Hjelte L. Psychometric evaluation of the Swedish
- 33 translation of the revised Cystic Fibrosis Questionnaire in adults. *Ups J Med Sci* 2017;122(1):61-6.
- 34 doi: <http://dx.doi.org/10.1080/03009734.2016.1225871>
- 35
- 36 66. Sawicki GS, Sellers DE, Robinson WM. Associations between illness perceptions and health-
- 37 related quality of life in adults with cystic fibrosis. *J Psychosom Res* 2011;70(2):161-7
- 38 doi:10.1016/j.jpsychores.2010.06.005
- 39
- 40 67. Borawska-Kowalczyk U, Sands D. Determinants of health-related quality of life in polish
- 41 patients with CF - adolescents' and parents' perspectives. *Med Wieku Rozwoj* 2015;19(1):127-36.
- 42
- 43 68. Sawicki GS, Rasouliyan L, McMullen AH, et al. Longitudinal assessment of health-related
- 44 quality of life in an observational cohort of patients with cystic fibrosis. *Pediatr Pulmonol*
- 45 2011;46(1):36-44 doi: 10.1002/ppul.21325
- 46
- 47 69. Sole A, Perez I, Vazquez I, et al. Patient-reported symptoms and functioning as indicators of
- 48 mortality in advanced cystic fibrosis: A new tool for referral and selection for lung transplantation. *J*
- 49 *Heart Lung Transplant* 2016;35(6):789-94 doi: <http://dx.doi.org/10.1016/j.healun.2016.01.1233>
- 50
- 51 70. Yuksel H, Yilmaz O, Dogru D, et al. Reliability and validity of the Cystic Fibrosis Questionnaire-
- 52 Revised for children and parents in Turkey: cross-sectional study. *Qual Life Res* 2013;22(2):409-14.
- 53 doi: 10.1007/s11136-012-0152-4
- 54
- 55 71. Debska G, Cepuch G, Mazurek H. Quality of life in patients with cystic fibrosis depending on
- 56 the severity of the disease and method of its treatment. *Postepy Hig Med Dosw (Online)*
- 57 2014;68:498-502.
- 58
- 59 72. Del Corral T, Percegon J, Lopez N, et al. Validity of a Spanish Version of the Leicester Cough
- 60 Questionnaire in Children With Cystic Fibrosis. *Arch Bronconeumol* 2016;52(2):63-9.

- 1  
2  
3 76. Chan DK, McNamara S, Park JS, et al. Sinonasal Quality of Life in Children With Cystic  
4 Fibrosis. *JAMA Otolaryngol Head Neck Surg* 2016;142(8):743-9. doi: 10.1001/jamaoto.2016.0979
- 5 77. Kang SH, Meotti CD, Bombardelli K, et al. Sinonasal characteristics and quality of life by  
6 SNOT-22 in adult patients with cystic fibrosis. *Eur Arch Otorhinolaryngol* 2017;274(4):1873-82 doi:  
7 0.1007/s00405-016-4426-2
- 8 78. Powell CVE, McNamara P, Solis A, et al. A parent completed questionnaire to describe the  
9 patterns of wheezing and other respiratory symptoms in infants and preschool children. *Arch Dis*  
10 *Child*. 2002;87(5):376-9. doi: <http://dx.doi.org/10.1136/adc.87.5.376>
- 11 79. Birring SS, Prudon B, Carr AJ, et al. Development of a symptom specific health status  
12 measure for patients with chronic cough: Leicester Cough Questionnaire (LCQ). *Thorax*.  
13 2003;58(4):339-43. doi: <http://dx.doi.org/10.1136/thorax.58.4.339>
- 14 80. Goldbeck L, Besier T, Hinz A, et al. Prevalence of symptoms of anxiety and depression in  
15 German patients with cystic fibrosis. *Chest* 2010;138(4):929-36.
- 16 81. Olveira C, Sole A, Giron R, et al. Depression and anxiety symptoms in Spanish adult patients  
17 with cystic fibrosis: Associations with health-related quality of life. *Gen Hosp Psychiatry* 2016;40:39-  
18 46.
- 19 82. Quon BS, Bentham WD, Unutzer J, et al. Prevalence of symptoms of depression and anxiety  
20 in adults with cystic fibrosis based on the PHQ-9 and GAD-7 screening questionnaires.  
21 *Psychosomatics* 2015;56(4):345-53.
- 22 83. Angelis A, Kanavos P, Lopez-Bastida J, et al. Social and economic costs and health-related  
23 quality of life in non-institutionalised patients with cystic fibrosis in the United Kingdom. *BMC Health*  
24 *Serv Res* 2015;15:428 doi: 10.1186/s12913-015-1061-3
- 25 84. Bradley JM, Blume SW, Balp MM, et al. Quality of life and healthcare utilisation in cystic  
26 fibrosis: a multicentre study. *Eur Respir J* 2013;41(3):571-7 doi: 10.1183/09031936.00224911
- 27 85. Chevreur K, Michel M, Brigham K, et al. Social/economic costs and health-related quality of  
28 life in patients with cystic fibrosis in Europe. *Eur J Health Econ* 2016;17:7-18 doi: 10.1007/s10198-  
29 016-0781-6
- 30 86. Vandeleur M, Walter LM, Armstrong DS, et al. Quality of life and mood in children with cystic  
31 fibrosis: Associations with sleep quality. *J Cyst Fibros* 2018;17(6):811-20 doi:  
32 <https://doi.org/10.1016/j.jcf.2017.11.021>
- 33 87. Uchmanowicz I, Jankowska-Polańska B, Wleklík M, et al. Health-related quality of life of  
34 patients with cystic fibrosis assessed by the SF-36 questionnaire. *Pneumonol Alergol Pol*  
35 2014;82(1):10-7
- 36 88. Varni WJ, Seid AM, Rode AC. The PedsQL™: Measurement Model for the Pediatric Quality of  
37 Life Inventory. *Medical Care* 1999;37(2):126-39.
- 38 89. Use of Patient-Reported Outcomes in Registries. In: Glicklich RE, Dryer NA, Leavy MB, eds.  
39 Registries for Evaluating Patient Outcomes: A User's Guide 2. Rockville, MD: Agency for Healthcare  
40 Research and Quality 2014
- 41 90. Backstrom-Eriksson L, Bergsten-Brucefors A, Hjelte L, et al. Associations between genetics,  
42 medical status, physical exercise and psychological well-being in adults with cystic fibrosis. *BMJ Open*  
43 *Respir Res* 2016;3:e000141 <https://bmjopenrespres.bmj.com/content/bmjresp/3/1/e000141.full.pdf>  
44 [accessed 15 Mar 2019] doi:10.1136/bmjresp-2016-000141
- 45 91. Australian Institute of Health and Welfare. Australia's Health 2018. Canberra; Australian  
46 Institute of Health and Welfare; 2018
- 47 92. Wilcox N, McNeil JJ. Clinical quality registries have the potential to drive improvements in  
48 the appropriateness of care. *Med J Aust* 2016;205(S10):S21-S6 doi:  
49 <https://doi.org/10.5694/mja15.00921>
- 50 93. Gee L, Abbott J, Conway SP, et al. Development of a disease specific health related quality of  
51 life measure for adults and adolescents with cystic fibrosis. *Thorax* 2000;55(11):946-54.
- 52  
53  
54  
55  
56  
57  
58  
59  
60

- 1  
2  
3 94. Henry B, Aussage P, Grosskopf C, et al. Development of the Cystic Fibrosis Questionnaire  
4 (CFQ) for assessing quality of life in pediatric and adult patients. *Qual Life Res.* 2003;12(1):63-76. doi:  
5 <https://doi.org/10.1023/A:1022037320039>  
6  
7 95. Cavanaugh K, Read L, Dreyfus J, et al. Association of poor sleep with behavior and quality of  
8 life in children and adolescents with cystic fibrosis. *Sleep Biol Rhythms* 2016;14(2):199-204 doi:  
9 [10.1007/s41105-015-0044-4](https://doi.org/10.1007/s41105-015-0044-4)  
10  
11  
12  
13  
14  
15  
16  
17  
18  
19  
20  
21  
22  
23  
24  
25  
26  
27  
28  
29  
30  
31  
32  
33  
34  
35  
36  
37  
38  
39  
40  
41  
42  
43  
44  
45  
46  
47  
48  
49  
50  
51  
52  
53  
54  
55  
56  
57  
58  
59  
60

For peer review only

1  
2  
3  
4  
5  
6  
7  
8  
9  
10  
11  
12  
13  
14  
15  
16  
17  
18  
19  
20  
21  
22  
23  
24  
25  
26  
27  
28  
29  
30  
31  
32  
33  
34  
35  
36  
37  
38  
39  
40  
41  
42  
43  
44  
45  
46  
47  
48  
49  
50  
51  
52  
53  
54  
55  
56  
57  
58  
59  
60

Identification

Total records identified (n=5671)  
 Embase (n=3606)  
 Medline (n=1325)  
 Scopus (n=291)  
 CINAHL (n=251)  
 PsycINFO (n=111)  
 Cochrane (n=87)

Screening

Duplicates removed  
 (n=1141)

Records excluded  
 (n=4416)  
 No PROM or HRQOL  
 (n=3159)  
 No diagnosed CF (n=820)  
 Conference abstracts (n=248)  
 No patient focus (n=140)  
 No abstract or title (n=29)  
 RCTs (n=19)  
 Non-English (n=1)

Eligibility

Records screened  
 (n=4530)

Full-text articles assessed  
 (n=114)

Full-text articles excluded  
 (n=23)  
 Reviews (n=7)  
 Full text not found (n=5)  
 No HRQOL (n=5)  
 Not CF focused (n=3)  
 No specific PROM (n=1)  
 Not most updated (n=1)  
 Editorial (n=1)

Included

Total number of studies retained  
 (n=91)

## Supplementary File 1: Complete search strategy

|                 |                                                                                                                            |
|-----------------|----------------------------------------------------------------------------------------------------------------------------|
| <b>Database</b> | <b>OVID MEDLINE</b>                                                                                                        |
| <b>Strategy</b> | <b>#1 OR #2 AND #3</b><br>Limit English language and humans and last 10 years                                              |
| #1              | Patient Reported Outcome Measures/exp OR "Surveys and Questionnaires/exp OR Self Report/exp or Perception/exp OR scale.mp  |
| #2              | "Quality of Life"/exp OR QOL.mp OR "health related quality of life". mp                                                    |
| #3              | Cystic Fibrosis/exp                                                                                                        |
| <b>Database</b> | <b>PsycINFO</b>                                                                                                            |
| <b>Strategy</b> | <b>#1 OR #2 AND #3</b><br>Limit English language and humans and last 10 years                                              |
| #1              | Patient reported outcome.mp OR Self Report/exp OR Client Attitudes/exp OR Questionnaires/exp OR Perception/exp OR scale.mp |
| #2              | "Quality of Life"/exp OR QOL.mp                                                                                            |
| #3              | Cystic Fibrosis/ exp                                                                                                       |
| <b>Database</b> | <b>Scopus</b>                                                                                                              |
| <b>Strategy</b> | <b>#1 OR #2 AND #3</b><br>Limit English language and Publication Year 2009 – 2019 and Final Publication                    |
| #1              | patient AND reported AND outcome* OR self-report* OR questionnaire OR scale OR perception                                  |
| #2              | quality AND of AND life                                                                                                    |
| #3              | cystic AND fibrosis                                                                                                        |
| <b>Database</b> | <b>Embase</b>                                                                                                              |
| <b>Strategy</b> | <b>#1 OR #2 AND #3</b><br>Limit English language and humans and last 10 years                                              |
| #1              | Patient-reported outcome/exp OR questionnaire/exp OR self report/exp or perception/exp OR scale.mp                         |
| #2              | Quality of life/exp OR QOL.mp                                                                                              |
| #3              | Cystic Fibrosis/ exp                                                                                                       |
| <b>Database</b> | <b>Cochrane</b>                                                                                                            |
| <b>Strategy</b> | <b>#1 OR #2 AND #3</b><br>Limit English language and humans and last 10 years                                              |
| #1              | Patient Reported Outcome Measures/exp OR Self Report/exp OR Survey and Questionnaires/exp                                  |

|                 |                                                                                   |                                                                                                  |
|-----------------|-----------------------------------------------------------------------------------|--------------------------------------------------------------------------------------------------|
|                 | #2                                                                                | Quality of Life/exp                                                                              |
|                 | #3                                                                                | Cystic Fibrosis/ exp                                                                             |
| <b>Database</b> | <b>CINAHL</b>                                                                     |                                                                                                  |
| <b>Strategy</b> | <b>#1 OR #2 AND #3</b><br>Limit English language and Publication Year 2009 - 2019 |                                                                                                  |
|                 | #1                                                                                | "Patient-reported Outcome Measures" OR "Self Report+" OR "Patient Attitudes" OR "Questionnaires" |
|                 | #2                                                                                | "Quality of Life+"                                                                               |
|                 | #3                                                                                | "Cystic Fibrosis"                                                                                |



1  
2  
3  
4  
5  
6  
7  
8  
9  
10  
11  
12  
13  
14  
15  
16  
17  
18  
19  
20  
21  
22  
23  
24  
25  
26  
27  
28  
29  
30  
31  
32  
33  
34  
35  
36  
37  
38  
39  
40  
41  
42  
43  
44  
45  
46  
47  
48  
49  
50  
51  
52  
53  
54  
55  
56  
57  
58  
59  
60

For peer review only

## Supplementary File 2: Data Extraction Table

| Author                     | Type of study      | Setting           | Patient group | Age mean (SD) | Population size, n | Instruments     | Type of PROM        | Why PROM used?                                    | Method of administration | Timepoints                              |
|----------------------------|--------------------|-------------------|---------------|---------------|--------------------|-----------------|---------------------|---------------------------------------------------|--------------------------|-----------------------------------------|
| Abbott et al, 2009, UK     | Prospective cohort | Inpatient         | All Age       | 25.1 (7.1)    | 223                | CFQOL<br>SF-36  | Specific<br>Generic | HRQOL as a predictor                              | Not stated               | At entry                                |
| Abbott et al, 2013, UK     | Longitudinal       | Outpatient Clinic | All Age       | Not stated    | 234                | CFQOL           | Specific            | Association between physical factors and HRQOL    | Postal                   | 7 assessments<br>2 yearly over 12 years |
| Abbott et al, 2015, UK     | Longitudinal       | Outpatient Clinic | All Age       | 28.5 (8.2)    | 234                | CFQOL           | Specific            | Association between demographic factors and HRQOL | Postal                   | 7 assessments<br>2 yearly over 12 years |
| Acaster et al, 2015, UK    | Cross-sectional    | National database | Adult         | 28.7 (8.88)   | 401                | CFQ-R           | Specific            | Used to validate another PROM                     | Online                   | At entry                                |
|                            |                    |                   |               |               |                    | EQ-5D           | Generic             | Economic evaluation                               |                          |                                         |
| Aguiar et al, 2017, Brazil | Cross-sectional    | Outpatient Clinic | Adult         | Not stated    | 52                 | CFQ             | Specific            | Correlate to another PROM                         | Software program         | At entry                                |
| Alpern et al, 2015, US     | Validation         | RCT data          | Child         | 2.28 (1.45)   | 314                | CFQ-R<br>Parent | Specific            | Validate PROM in new age group                    | Not stated               | 5 assessments<br>12 weeks apart         |
| Angelis et al, 2015, UK    | Cross-sectional    | National database | All Age       | 18.3 (15.1)   | 74                 | EQ-5D           | Generic             | HRQOL in a population                             | Postal and online        | At entry                                |
| Ashish et al, 2012, UK     | Cross-sectional    | Outpatient Clinic | Adult         | Not stated    | 157                | CFQ-R           | Specific            | Association between physical factors and HRQOL    | Paper                    | At entry                                |

| Author                                             | Type of study   | Setting           | Patient group | Age mean (SD) | Population size, n | Instruments | Type of PROM | Why PROM used?                                 | Method of administration | Timepoints                      |
|----------------------------------------------------|-----------------|-------------------|---------------|---------------|--------------------|-------------|--------------|------------------------------------------------|--------------------------|---------------------------------|
| Backstrom-Eriksson et al, 2016, Sweden             | Cross-sectional | Outpatient Clinic | Adult         | 32.2          | 68                 | CFQ-R       | Specific     | Association between physical factors and HRQOL | Paper                    | At entry                        |
|                                                    |                 |                   |               |               |                    | HADS        | Generic      | Association between physical factors and HRQOL | Paper                    |                                 |
| Bhati et al, 2012, US                              | Longitudinal    | Inpatient         | Child         | 13.1 (3.8)    | 22                 | CFQ-R       | Specific     | Correlate to diagnostic test                   | Not stated               | 3 assessments<br>1 week apart   |
| Blackwell et al, 2013, US                          | Longitudinal    | RCT data          | Child         | 15.8 (2.9)    | 95                 | CFQ-R       | Specific     | Association between physical factors and HRQOL | Not stated               | 3 assessments<br>3 months apart |
| Bodnar et al, 2014, Hungary                        | Cross-sectional | Outpatient Clinic | All Age       | 14.3 (4.81)   | 59                 | CFQ-R       | Specific     | Association between physical factors and HRQOL | Not stated               | At entry                        |
| Bodnar et al, 2015, Hungary                        | Cross-sectional | Outpatient Clinic | Child         | 11.61 (2.56)  | 172                | PedsQL      | Generic      | Association between physical factors and HRQOL | Not stated               | At entry                        |
| Borawska-Kowalczyk et al, 2015, Poland             | Cross-sectional | Outpatient Clinic | Child         | 14.41 (2.61)  | 70                 | CFQ-R       | Specific     | Association between physical factors and HRQOL | Not stated               | At entry                        |
| Borawska-Kowalczyk et al, 2015, Poland and Hungary | Cross-sectional | Outpatient Clinic | Child         | 13.63 (2.93)  | 141                | CFQ-R       | Specific     | HRQOL in a population                          | Not stated               | At entry                        |

1  
2  
3  
4  
5  
6  
7  
8  
9  
10  
11  
12  
13  
14  
15  
16  
17  
18  
19  
20  
21  
22  
23  
24  
25  
26  
27  
28  
29  
30  
31  
32  
33  
34  
35  
36  
37  
38  
39  
40  
41  
42  
43  
44  
45  
46

| Author                              | Type of study                 | Setting                                            | Patient group | Age mean (SD) | Population size, n | Instruments | Type of PROM | Why PROM used?                                 | Method of administration | Timepoints                    |
|-------------------------------------|-------------------------------|----------------------------------------------------|---------------|---------------|--------------------|-------------|--------------|------------------------------------------------|--------------------------|-------------------------------|
| Bouka et al, 2012, Germany          | Cross-sectional               | Outpatient Clinic                                  | Adult         | 34.4 (7.5)    | 55                 | CFQ-R       | Specific     | Association between physical factors and HRQOL | Not stated               | At entry                      |
| Bradley et al, 2013, UK             | Longitudinal                  | Not stated                                         | All Age       | 28.5 (8.2)    | 94                 | EQ-5D       | Generic      | Economic evaluation                            | Not stated               | At entry and 8-12 weeks later |
|                                     |                               |                                                    |               |               |                    | CFQ-R       | Specific     | Correlate to another PROM                      | Not stated               |                               |
| Cavanaugh et al, 2016, US           | Cross-sectional               | Outpatient Clinic                                  | Child         | 11.6 (3.6)    | 50                 | CFQ-R       | Specific     | Association between physical factors and HRQOL | Not stated               | At entry                      |
| Chan et al, 2016, US                | Cross-sectional               | Outpatient Clinic                                  | Child         | 12.9 (5.6)    | 47                 | SN-5        | Respiratory  | Association between physical factors and HRQOL | Paper                    | At entry                      |
| Chevreur et al, 2015, France        | Retrospective cross-sectional | Outpatient Clinic, CF Society, patient association | All Age       | 15.4 (11.3)   | 240                | EQ-5D       | Generic      | HRQOL in a population                          | Online                   | At entry                      |
| Chevreur et al, 2016, Multinational | Cross-sectional               | Outpatient Clinic, national registries             | All Age       | 18.5 (14.1)   | 905                | EQ-5D       | Generic      | HRQOL in a population                          | Postal or Online         | At entry                      |
| Cohen et al, 2010, Brazil           | Cross-sectional               | Outpatient Clinic                                  | All Age       | 12.5 (5.1)    | 75                 | CFQ         | Specific     | HRQOL in a population                          | Paper and Interview      | Not stated                    |
| Cronly et al, 2019, Ireland         | Cross-sectional               | Outpatient Clinic                                  | Adult         | 30.5 (9.1)    | 147                | HADS        | Generic      | Association between psychological              | Paper and Online         | At entry                      |

| Author                                        | Type of study   | Setting           | Patient group | Age mean (SD) | Population size, n | Instruments   | Type of PROM | Why PROM used?                                      | Method of administration | Timepoints                  |
|-----------------------------------------------|-----------------|-------------------|---------------|---------------|--------------------|---------------|--------------|-----------------------------------------------------|--------------------------|-----------------------------|
|                                               |                 |                   |               |               |                    |               |              | factors and HRQOL                                   |                          |                             |
|                                               |                 |                   |               |               |                    | CFQ-R         | Specific     | Association between psychological factors and HRQOL | Paper and Online         | At entry                    |
| Debska et al, 2014, Poland                    | Cross-sectional | Outpatient Clinic | Adult         | Not stated    | 45                 | CFQOL         | Specific     | Association between physical factors and HRQOL      | Not stated               | At entry                    |
| Debska et al, 2015, Poland                    | Longitudinal    | Inpatient         | All Age       | 21.1 (5.1)    | 67                 | CFQOL         | Specific     | Association between physical factors and HRQOL      | Not stated               | At entry and one year later |
| del Corral et al, 2016, Spain                 | Validation      | Inpatient         | Child         | 11.7 (3.1)    | 58                 | LCQ           | Respiratory  | Validate PROM                                       | Not stated               | At entry and 2 weeks later  |
| de Souza Serio dos Santos et al, 2013, Brazil | Validation      | Not stated        | Child         | Not stated    | 51                 | DISABKIDS-CFM | Specific     | Validate PROM                                       | Not stated               | At entry                    |
| de Souza Serio dos Santos et al, 2014, Brazil | Validation      | Outpatient Clinic | Child         | 11.91 (2.79)  | 113                | DISABKIDS-CFM | Specific     | Validate PROM                                       | Not stated               | At entry and 3 months later |
| Dill et al, 2013, US                          | Longitudinal    | Outpatient Clinic | Adult         | 32.52 (10.65) | 333                | CFQ-R         | Specific     | Examine trends in HRQOL over time                   | Postal                   | 7 assessments 3 monthly     |

| Author                         | Type of study                 | Setting           | Patient group | Age mean (SD) | Population size, n | Instruments | Type of PROM | Why PROM used?                                 | Method of administration | Timepoints                                      |
|--------------------------------|-------------------------------|-------------------|---------------|---------------|--------------------|-------------|--------------|------------------------------------------------|--------------------------|-------------------------------------------------|
| Driscoll et al, 2015, US       | Cross-sectional               | RCT data          | Child         | 3.82 (1.27)   | 73                 | CFQ-R       | Specific     | Association between social factors and HRQOL   | Not stated               | At entry                                        |
|                                |                               |                   |               |               |                    | PedsQL      | Generic      | Validate PROM in new age group                 |                          |                                                 |
| Edwards et al, 2018, US        | Qualitative                   | Outpatient Clinic | Child         | Not stated    | 37                 | CFRSD       | Specific     | Develop PROM                                   | Online                   | At entry                                        |
| Eidt-Koch et al, 2009, Germany | Cross-sectional               | Outpatient Clinic | Child         | Not stated    | 96                 | EQ-5D       | Generic      | Validate PROM                                  | Not stated               | At entry                                        |
|                                |                               |                   |               |               |                    | CFQ         | Specific     | Used to validate another PROM                  |                          |                                                 |
| Flume et al, 2018, US          | Retrospective cross-sectional | RCT data          | All Age       | Not stated    | 80                 | CFQ-R       | Specific     | Association between physical factors and HRQOL | Paper                    | 6 assessments<br>Baseline, week 2, 4, 8, 16, 24 |
| Forte et al, 2015, Brazil      | Cross-sectional               | Outpatient Clinic | Adult         | 25.1 (8.8)    | 51                 | WHOQOL-BREF | Generic      | Association between physical factors and HRQOL | Not stated               | At entry                                        |
|                                |                               |                   |               |               |                    | CFQOL       | Specific     | Association between physical factors and HRQOL |                          |                                                 |
| Gancz et al, 2018, Brazil      | Cross-sectional               | Outpatient Clinic | Child         | 16.4 (2.3)    | 31                 | CFQ-R       | Specific     | Association between physical factors and HRQOL | Interview                | At entry                                        |
| Goldbeck et al, 2010, Germany  | Cross-sectional               | Outpatient Clinic | All Age       | 23.1 (9.1)    | 670                | HADS        | Generic      | HRQOL in a population                          | Not stated               | At entry                                        |

| Author                          | Type of study                | Setting                  | Patient group | Age mean (SD) | Population size, n | Instruments      | Type of PROM | Why PROM used?                                            | Method of administration | Timepoints                   |
|---------------------------------|------------------------------|--------------------------|---------------|---------------|--------------------|------------------|--------------|-----------------------------------------------------------|--------------------------|------------------------------|
| Goss et al, 2009, US            | Qualitative                  | Outpatient Clinic        | All Age       | 12.1 (4)      | 15                 | CF Symptom Diary | Specific     | Develop PROM                                              | Not administered         | Not administered             |
| Groeneveld et al, 2012, Spain   | Cross-sectional              | Outpatient Clinic        | Child         | 11.6 (3.1)    | 28                 | CFQ-R            | Specific     | Association between social and physical factors and HRQOL | Paper and Interview      | At entry                     |
| Habib et al, 2015, Canada       | Cross-sectional              | Outpatient Clinic        | Adult         | 34.9 (11.9)   | 103                | CFQ-R            | Specific     | Association between physical factors and HRQOL            | Paper                    | At entry                     |
| Havermans et al, 2009, Belgium  | Cross-sectional              | Outpatient Clinic        | Adult         | 26.79 (8.15)  | 57                 | CFQ-R            | Specific     | Association between social factors and HRQOL              | Not stated               | At entry                     |
| Hebestreit et al, 2014, Germany | Non-randomised control trial | Outpatient Clinic        | All Age       | 20.6 (5.8)    | 70                 | CFQ-R            | Specific     | Association between physical factors and HRQOL            | Paper                    | At entry and 6 months        |
| Hegarty et al, 2009, Australia  | Cross-sectional              | Outpatient and Inpatient | Child         | 12.06 (3.97)  | 33                 | CFQ-R            | Specific     | HRQOL in a population                                     | Not stated               | At entry                     |
| Hochwalder et al, 2017, Sweden  | Validation                   | Outpatient Clinic        | Adult         | 30.8 (11.98)  | 173                | CFQ-R            | Specific     | Validate PROM                                             | Not stated               | At entry                     |
| Horck et al, 2017, Netherlands  | Longitudinal                 | Outpatient Clinic        | Child         | 10.3 (3.6)    | 49                 | CFQ-R            | Specific     | Association between physical factors and HRQOL            | Paper and Interview      | 3 assessments 6 months apart |
| Ihle et al, 2015, Germany       | Cross-sectional              | Outpatient Clinic        | Adult         | 50 (11.9)     | 152                | SF-36            | Generic      | Association between physical and demographic              | Paper                    | At entry                     |

| Author                           | Type of study   | Setting                  | Patient group | Age mean (SD) | Population size, n | Instruments | Type of PROM | Why PROM used?                                                 | Method of administration | Timepoints |
|----------------------------------|-----------------|--------------------------|---------------|---------------|--------------------|-------------|--------------|----------------------------------------------------------------|--------------------------|------------|
|                                  |                 |                          |               |               |                    |             |              | factors and HRQOL                                              |                          |            |
|                                  |                 |                          |               |               |                    | SGRQ        | Respiratory  | Association between physical and demographic factors and HRQOL |                          |            |
|                                  |                 |                          |               |               |                    | PLC         | Generic      | Association between physical and demographic factors and HRQOL |                          |            |
| Iscar-Urrutia et al, 2018, Spain | Cross-sectional | Outpatient Clinic        | Adult         | 32            | 23                 | CFQ-R       | Specific     | Association between physical factors and HRQOL                 | Paper                    | At entry   |
| Kang et al, 2017, Brazil         | Cross-sectional | Outpatient Clinic        | All Age       | 25.71 (8.13)  | 91                 | SNOT-22     | Respiratory  | Association between physical factors and HRQOL                 | Not stated               | At entry   |
| Kelemen et al, 2011, Australia   | Cross-sectional | Outpatient Clinic        | Adult         | 29.4 (8.5)    | 73                 | CFQOL       | Specific     | Association between physical factors and HRQOL                 | Not stated               | At entry   |
| Kianifar et al, 2013, Iran       | Cross-sectional | Outpatient Clinic        | Child         | 5 (3.4)       | 36                 | PedsQL      | Generic      | HRQOL in a population                                          | Not stated               | Not stated |
| Kilcoyne et al, 2016             | Cross-sectional | Outpatient and Inpatient | Adult         | 27.8 (7.9)    | 101                | CFQ-R       | Specific     | Correlate to diagnostic test                                   | Paper                    | At entry   |



| Author                     | Type of study      | Setting              | Patient group | Age mean (SD) | Population size, n | Instruments | Type of PROM | Why PROM used?                                      | Method of administration | Timepoints                   |
|----------------------------|--------------------|----------------------|---------------|---------------|--------------------|-------------|--------------|-----------------------------------------------------|--------------------------|------------------------------|
| Kir et al, 2015, India     | Cross-sectional    | Inpatient            | Child         | 11.5 (4.5)    | 59                 | CFQ-R       | Specific     | HRQOL in a population                               | Paper and Interview      | At entry                     |
| Lectzin et al, 2016, US    | Cross-sectional    | Outpatient Clinic    | Child         | 15.6 (2.5)    | 73                 | CFQ-R       | Specific     | Association between physical factors and HRQOL      | Online                   | At entry                     |
| McHugh et al, 2016, UK     | Cross-sectional    | Online Support Group | Adult         | 29 (8.34)     | 122                | CFQ-R       | Specific     | Association between psychological factors and HRQOL | Not stated               | Not stated                   |
| Modi et al, 2009, US       | Prospective cohort | Inpatient            | Child         | 13.6 (3.7)    | 52                 | PedsQL      | Generic      | HRQOL as outcome of intervention                    | Paper                    | At entry and 2 weeks later   |
|                            |                    |                      |               |               |                    | CFQ-R       | Specific     | HRQOL as outcome of intervention                    |                          |                              |
| Norrish et al, 2015, Oman  | Development        | Outpatient Clinic    | Child         | 6             | 12                 | CF-SPS      | Specific     | Develop PROM                                        | Interview                | Not stated                   |
| Oliver et al, 2015, US     | Longitudinal       | Outpatient Clinic    | All Age       | 19 (3.2)      | 71                 | HADS        | Generic      | Association between social factors and HRQOL        | Paper and Online         | 3 assessments 6 months apart |
|                            |                    |                      |               |               |                    | CFQ-R       | Specific     | Association between social factors and HRQOL        |                          |                              |
| Olveira et al, 2016, Spain | Cross-sectional    | Outpatient Clinic    | Adult         | 28.1 (8.2)    | 336                | HADS        | Generic      | Association between psychological factors and HRQOL | Paper                    | At entry                     |

| Author                                 | Type of study   | Setting                        | Patient group | Age mean (SD) | Population size, n | Instruments | Type of PROM | Why PROM used?                                      | Method of administration                 | Timepoints                                                |
|----------------------------------------|-----------------|--------------------------------|---------------|---------------|--------------------|-------------|--------------|-----------------------------------------------------|------------------------------------------|-----------------------------------------------------------|
|                                        |                 |                                |               |               |                    | CFQ-R       | Specific     | Association between psychological factors and HRQOL |                                          |                                                           |
| Platten et al, 2013, UK                | Cross-sectional | National database              | Adult         | 27.8 (9.2)    | 74                 | CFQ-R       | Specific     | Association between psychological factors and HRQOL | Online                                   | At entry                                                  |
|                                        |                 |                                |               |               |                    | CORE-OM     | Generic      | HRQOL in a population                               |                                          |                                                           |
| Quittner et al, 2009, US and Australia | Validation      | RCT data                       | All Age       | Not stated    | 200                | CFQ-R       | Specific     | Determine MCID                                      | Not stated                               | Not stated                                                |
| Quittner et al, 2010, US               | Cross-sectional | Longitudinal cohort study data | All Age       | Not stated    | 4751               | CFQ-R       | Specific     | Association between demographic factors and HRQOL   | Paper and Interview                      | At entry                                                  |
| Quittner et al, 2012, US               | Validation      | Longitudinal cohort study data | All Age       | Not stated    | 7330               | CFQ-R       | Specific     | Validate PROM                                       | Interview for children, other not stated | At entry                                                  |
| Quon et al, 2015, US                   | Cross-sectional | Outpatient Clinic              | Adult         | 28.6 (8.8)    | 153                | PHQ-9       | Generic      | HRQOL in a population                               | Not stated                               | At entry                                                  |
|                                        |                 |                                |               |               |                    | GAD-7       | Generic      | HRQOL in a population                               |                                          |                                                           |
| Ricotti et al, 2017, Italy             | Longitudinal    | Outpatient Clinic              | Adult         | 49.87 (11.8)  | 57                 | SF-36       | Generic      | HRQOL in a population                               | Interview                                | Four assessments Before LTx and 6,12, 24 months after LTx |
|                                        |                 |                                |               |               |                    | SGRQ        | Respiratory  | HRQOL in a population                               |                                          |                                                           |
|                                        |                 |                                |               |               |                    | GHQ         | Generic      | HRQOL in a population                               |                                          |                                                           |

| Author                       | Type of study                | Setting                        | Patient group | Age mean (SD) | Population size, n | Instruments | Type of PROM | Why PROM used?                                      | Method of administration | Timepoints                  |
|------------------------------|------------------------------|--------------------------------|---------------|---------------|--------------------|-------------|--------------|-----------------------------------------------------|--------------------------|-----------------------------|
| Salek et al, 2012, UK        | Cross-sectional              | Outpatient and Inpatient       | Adult         | 26.1 (7.3)    | 70                 | UKSIP       | Generic      | Used to validate another PROM                       | Postal and interview     | At entry                    |
|                              |                              |                                |               |               |                    | CFQOL       | Specific     | Validate PROM                                       |                          |                             |
| Sawicki et al, 2009, US      | Cross-sectional              | Longitudinal cohort study data | Adult         | 35.4 (10)     | 204                | CFQ-R       | Specific     | HRQOL in a population                               | Not stated               | At entry                    |
| Sawicki, 2011, US            | Cross-sectional              | Outpatient Clinic              | Adult         | 35.8 (10.3)   | 199                | CFQ-R       | Specific     | Association between psychological factors and HRQOL | Not stated               | Not stated                  |
| Sawicki et al, 2011, US      | Longitudinal                 | National database              | All Age       | Not stated    | 1366               | CFQ-R       | Specific     | Association between physical factors and HRQOL      | Not stated               | At entry and one year later |
| Schmidt et al, 2009, Germany | Validation                   | Outpatient Clinic              | Child         | 10.2 (1.9)    | 136                | CFQ-R       | Specific     | Validate PROM                                       | Paper and Interview      | At entry                    |
| Schmidt et al, 2011, Denmark | Non-randomised control trial | Outpatient Clinic              | All Age       | Not stated    | 38                 | CFQ-R       | Specific     | Association between physical factors and HRQOL      | Not stated               | At entry and 3 months later |
| Shoff et al, 2013, US        | Longitudinal                 | RCT data                       | Child         | 13.5          | 95                 | CFQ         | Specific     | Association between social factors and HRQOL        | Paper and Interview      | 3 assessments Yearly        |
| Simon et al, 2011, US        | Cross-sectional              | Outpatient Clinic              | Child         | 13.6 (2.3)    | 54                 | CFQ-R       | Specific     | Association between psychological factors and HRQOL | Paper                    | At entry                    |

| Author                           | Type of study                 | Setting                        | Patient group | Age mean (SD) | Population size, n | Instruments | Type of PROM | Why PROM used?                                    | Method of administration | Timepoints                                                                      |
|----------------------------------|-------------------------------|--------------------------------|---------------|---------------|--------------------|-------------|--------------|---------------------------------------------------|--------------------------|---------------------------------------------------------------------------------|
| Sole et al, 2016, Spain          | Longitudinal                  | Outpatient Clinic              | Adult         | 25.4 (8.5)    | 152                | CFQ-R       | Specific     | HRQOL as a predictor                              | Not stated               | 12 assessments<br>3 monthly                                                     |
| Sole et al, 2018, Spain          | Validation                    | Outpatient Clinic              | All Age       | Not stated    | 50                 | e-CFQ-R     | Specific     | Validate PROM                                     | Software program         | At entry and 15 days later                                                      |
| Solem et al, 2016, US            | Longitudinal                  | RCT data                       | All Age       | 25.5 (9.5)    | 161                | EQ-5D       | Generic      | Association between physical factors and HRQOL    | Not stated               | 8 assessments<br>Baseline, day 15, week 8, every 8 weeks after through 48 weeks |
| Stofa et al, 2016, Greece        | Cross-sectional               | Not stated                     | Adult         | Not stated    | 77                 | CFQOL       | Specific     | HRQOL in a population                             | Not stated               | At entry                                                                        |
| Tepper et al, 2013, Netherlands  | Retrospective cross-sectional | Outpatient Clinic              | Child         | 13.4          | 72                 | CFQ-R RSS   | Specific     | Correlate to diagnostic test                      | Paper                    | 3 assessments<br>Yearly                                                         |
| Tibosch et al, 2011, Netherlands | Cross-sectional               | Healthy school children        | Child         | 14.52 (3.16)  | 478                | CFQ         | Specific     | HRQOL in a population                             | Paper and Interview      | At entry                                                                        |
| Tluczek et al, 2011, US          | Longitudinal                  | Longitudinal cohort study data | Child         | 13.5 (2.8)    | 95                 | CFQ         | Specific     | Association between demographic factors and HRQOL | Paper and Interview      | Not stated                                                                      |
| Tluczek et al, 2013, US          | Longitudinal                  | Longitudinal cohort study data | Child         | 13.3 (2.7)    | 92                 | CFQ         | Specific     | Assess parent-proxy reporting                     | Paper and Interview      | Not stated                                                                      |
| Tomaszek et al, 2018, Poland     | Cross-sectional               | Outpatient Clinic              | All Age       | 19            | 95                 | CFQOL       | Specific     | Association between physical factors and HRQOL    | Not stated               | Not stated                                                                      |

| Author                           | Type of study   | Setting                  | Patient group | Age mean (SD) | Population size, n | Instruments | Type of PROM | Why PROM used?                                      | Method of administration | Timepoints                                                  |
|----------------------------------|-----------------|--------------------------|---------------|---------------|--------------------|-------------|--------------|-----------------------------------------------------|--------------------------|-------------------------------------------------------------|
|                                  |                 |                          |               |               |                    | HADS        | Generic      | Association between psychological factors and HRQOL |                          |                                                             |
| Toth et al, 2016, Hungary        | Cross-sectional | Not stated               | Adult         | 28.25 (8.95)  | 57                 | CFQ-R       | Specific     | HRQOL in a population                               | Paper                    | At entry                                                    |
| Trinick et al,                   | Cross-sectional | Outpatient Clinic        | Child         | Not stated    | 63                 | LRSQ        | Respiratory  | Validate PROM in new age group                      | Not stated               | At entry                                                    |
| Uchmanowicz et al, 2014, Poland  | Cross-sectional | Outpatient Clinic        | Adult         | 24.83 (6.98)  | 30                 | SF-36       | Generic      | HRQOL in a population                               | Not stated               | Not stated                                                  |
| Uchmanowicz et al, 2015, Poland  | Cross-sectional | Outpatient Clinic        | Adult         | 24.83 (6.98)  | 30                 | CFQOL       | Specific     | Association between demographic factors and HRQOL   | Not stated               | Not stated                                                  |
| Vandeleur et al, 2018, Australia | Cross-sectional | Outpatient Clinic        | Child         | Not stated    | 87                 | CFQ-R       | Specific     | Association between physical factors and HRQOL      | Not stated               | Not stated                                                  |
|                                  |                 |                          |               |               |                    | PedsQL      | Generic      | Association between physical factors and HRQOL      |                          |                                                             |
| Ward et al, 2017, Australia      | Validation      | Outpatient and Inpatient | Adult         | 29 (9.3)      | 59                 | LCQ         | Respiratory  | Validate PROM                                       | Paper                    | 3 assessments At entry, one week later and four weeks later |
|                                  |                 |                          |               |               |                    | ReS-CF      | Specific     | Develop PROM                                        |                          |                                                             |
|                                  |                 |                          |               |               |                    | CFQ-R       | Specific     | Used to validate another PROM                       |                          |                                                             |

| Author                       | Type of study   | Setting           | Patient group | Age mean (SD) | Population size, n | Instruments           | Type of PROM | Why PROM used?                                      | Method of administration | Timepoints                         |
|------------------------------|-----------------|-------------------|---------------|---------------|--------------------|-----------------------|--------------|-----------------------------------------------------|--------------------------|------------------------------------|
| Xie et al, 2017, US          | Validation      | Not stated        | Child         | 8.7 (5.28)    | 165                | SN-5                  | Respiratory  | Validate PROM in new age group                      | Not stated               | At entry and median 7 months later |
| Yohannes et al, 2011, UK     | Validation      | Outpatient Clinic | Adult         | 29.6 (8.9)    | 121                | Single item QOL scale | Generic      | Develop PROM                                        | Paper                    | At entry and 10 days later         |
|                              |                 |                   |               |               |                    | CFQOL                 | Specific     | Used to validate another PROM                       |                          |                                    |
|                              |                 |                   |               |               |                    | HADS                  | Generic      | Used to validate another PROM                       |                          |                                    |
| Yohannes et al, 2012, UK     | Cross-sectional | Outpatient Clinic | Adult         | 30 (8.8)      | 121                | CFQOL                 | Specific     | Association between psychological factors and HRQOL | Paper                    | At entry                           |
|                              |                 |                   |               |               |                    | HADS                  | Generic      | HRQOL in a population                               |                          |                                    |
| Young et al, 2011, Australia | Cross-sectional | Outpatient Clinic | Adult         | 31 (8)        | 60                 | CFQOL                 | Specific     | Association between physical factors and HRQOL      | Not stated               | Not stated                         |
| Yuksel et al, 2013, Turkey   | Validation      | Outpatient Clinic | Child         | 9.8 (2.6)     | 51                 | CFQ-R                 | Specific     | Validate PROM                                       | Not stated               | Not stated                         |
|                              |                 |                   |               |               |                    | KINDL                 | Generic      | Used to validate another PROM                       |                          |                                    |

## Supplementary File 3: Results of critical appraisal using COSMIN Risk of Bias Checklist

|                      | 1. PROM development | 2. Content validity | 3. Structural validity | 4. Internal consistency | 5. Cross cultural validity | 6. Reliability | 7. Measurement Error | 8. Criterion validity | 9. Hypothesis testing for construct validity | 10. Responsiveness |
|----------------------|---------------------|---------------------|------------------------|-------------------------|----------------------------|----------------|----------------------|-----------------------|----------------------------------------------|--------------------|
| <b>CFQOL</b>         |                     |                     |                        |                         |                            |                |                      |                       |                                              |                    |
| <b>CFQOL English</b> |                     |                     |                        |                         |                            |                |                      |                       |                                              |                    |
| Abbott 2009          |                     |                     |                        | Very good               |                            | Adequate       |                      |                       | Adequate                                     |                    |
| Abbott 2013          | -                   | -                   | -                      | Very good               | -                          | Adequate       | -                    | -                     | Adequate                                     | Doubtful           |
| Abbott 2015          | -                   | -                   | -                      | Very good               | -                          | Adequate       | -                    | -                     | Adequate                                     | Doubtful           |
| Salek 2012           | -                   | Doubtful            | -                      | Doubtful                | -                          | Adequate       | -                    | -                     | Adequate                                     | -                  |
| Yohannes 2011        | -                   | -                   | -                      | -                       | -                          | Very good      | -                    | -                     | -                                            | -                  |
| Yohannes 2012        | -                   | -                   | -                      | -                       | -                          | -              | -                    | -                     | Very good                                    | -                  |
| Young 2011           | -                   | -                   | -                      | -                       | -                          | -              | -                    | -                     | Adequate                                     | -                  |
| <b>CFQoL Greek</b>   |                     |                     |                        |                         |                            |                |                      |                       |                                              |                    |
| Stofa 2016           | -                   | -                   | -                      | Doubtful                | -                          | -              | -                    | -                     | -                                            | -                  |
| <b>CFQ-R</b>         |                     |                     |                        |                         |                            |                |                      |                       |                                              |                    |
| <b>CFQ-R English</b> |                     |                     |                        |                         |                            |                |                      |                       |                                              |                    |
| Alpern 2015          | -                   | -                   | -                      | Very good               | -                          | -              | -                    | -                     | Doubtful                                     | -                  |
| Driscoll 2015        | -                   | -                   | -                      | Very good               | -                          | -              | -                    | -                     | Adequate                                     | -                  |
| Hegarty 2009         | -                   | -                   | -                      | -                       | -                          | -              | -                    | -                     | Very good                                    | -                  |
| Kilcoyne 2016        | -                   | -                   | -                      | -                       | -                          | -              | -                    | -                     | Doubtful                                     | -                  |
| Mc Hugh 2016         | -                   | -                   | -                      | Very good               | -                          | -              | -                    | -                     | Very good                                    | -                  |
| Modi 2010            | -                   | -                   | -                      | -                       | -                          | -              | -                    | -                     | -                                            | Adequate           |
| Oliver 2014          | -                   | -                   | -                      | Very good               | -                          | -              | -                    | -                     | Very good                                    | -                  |

|                         | 1. PROM development | 2. Content validity | 3. Structural validity | 4. Internal consistency | 5. Cross cultural validity | 6. Reliability | 7. Measurement Error | 8. Criterion validity | 9. Hypothesis testing for construct validity | 10. Responsiveness |
|-------------------------|---------------------|---------------------|------------------------|-------------------------|----------------------------|----------------|----------------------|-----------------------|----------------------------------------------|--------------------|
| Quittner 2012           | -                   | -                   | -                      | Very good               | -                          | -              | -                    | -                     | Doubtful                                     | -                  |
| Sawicki 2011            | -                   | -                   | -                      | -                       | -                          | -              | -                    | -                     | Adequate                                     | -                  |
| Simon 2011              | -                   | -                   | -                      | Very good               | -                          | -              | -                    | -                     | Adequate                                     | -                  |
| Sole 2016               | -                   | -                   | -                      | -                       | -                          | Very good      | -                    | -                     | -                                            | -                  |
| <b>CFQ-R German</b>     |                     |                     |                        |                         |                            |                |                      |                       |                                              |                    |
| Herbestreit 2014        | -                   | -                   | -                      | -                       | -                          | -              | -                    | -                     | Adequate                                     | Adequate           |
| Schmidt 2009            | -                   | -                   | Adequate               | Very good               | -                          | Adequate       | -                    | -                     | Doubtful                                     | -                  |
| Sole 2018               | -                   | -                   | -                      | -                       | -                          | Very good      | -                    | -                     | -                                            | -                  |
| <b>CFQ-R Polish</b>     |                     |                     |                        |                         |                            |                |                      |                       |                                              |                    |
| Borawska Kowalczyk 2015 | -                   | -                   | -                      | Very good               | -                          | -              | -                    | -                     | Adequate                                     | -                  |
| Borawska Kowalczyk 2016 | -                   | -                   | -                      | Very good               | Inadequate                 | -              | -                    | -                     | -                                            | -                  |
| <b>CFQ-R Dutch</b>      |                     |                     |                        |                         |                            |                |                      |                       |                                              |                    |
| Havermans 2009          | -                   | -                   | -                      | Very good               | -                          | -              | -                    | -                     | Adequate                                     | -                  |
| Horck 2017              | -                   | -                   | -                      | -                       | -                          | -              | -                    | -                     | Adequate                                     | -                  |
| Tepper 2012             | -                   | -                   | -                      | -                       | -                          | -              | -                    | -                     | Adequate                                     | -                  |
| <b>CFQ-R Persian</b>    |                     |                     |                        |                         |                            |                |                      |                       |                                              |                    |
| Kianifar 2013           | -                   | -                   | -                      | -                       | -                          | Doubtful       | -                    | -                     | Adequate                                     | -                  |
| <b>CFQ-R Hindi</b>      |                     |                     |                        |                         |                            |                |                      |                       |                                              |                    |
| Kir 2015                | -                   | -                   | Inadequate             | Very good               | -                          | -              | -                    | -                     | Doubtful                                     | -                  |
| <b>CFQ-R Dutch</b>      |                     |                     |                        |                         |                            |                |                      |                       |                                              |                    |



1  
2  
3  
4  
5  
6  
7  
8  
9  
10  
11  
12  
13  
14  
15  
16  
17  
18  
19  
20  
21  
22  
23  
24  
25  
26  
27  
28  
29  
30  
31  
32  
33  
34  
35  
36  
37  
38  
39  
40  
41  
42  
43  
44  
45  
46

|                          | 1. PROM development | 2. Content validity | 3. Structural validity | 4. Internal consistency | 5. Cross cultural validity | 6. Reliability | 7. Measurement Error | 8. Criterion validity | 9. Hypothesis testing for construct validity | 10. Responsiveness |
|--------------------------|---------------------|---------------------|------------------------|-------------------------|----------------------------|----------------|----------------------|-----------------------|----------------------------------------------|--------------------|
| Schmidt 2011             | -                   | -                   | -                      | Very good               | -                          | -              | -                    | -                     | -                                            | Adequate           |
| <b>CFQ-R Hungarian</b>   |                     |                     |                        |                         |                            |                |                      |                       |                                              |                    |
| Toth 2016                | -                   | -                   | -                      | -                       | -                          | -              | -                    | -                     | Doubtful                                     | -                  |
| <b>CFQ-R Swedish</b>     |                     |                     |                        |                         |                            |                |                      |                       |                                              |                    |
| Backstrom-Eriksson 2016  | -                   | -                   | -                      | -                       | -                          | -              | -                    | -                     | Doubtful                                     | -                  |
| Hochwalder 2017          | -                   | -                   | -                      | Very good               | -                          | Adequate       | -                    | -                     | Doubtful                                     | -                  |
| <b>CFQ-R Turkish</b>     |                     |                     |                        |                         |                            |                |                      |                       |                                              |                    |
| Yuksel 2013              | -                   | -                   | -                      | Very good               | -                          | -              | -                    | -                     | Doubtful                                     | -                  |
| <b>CFQ</b>               |                     |                     |                        |                         |                            |                |                      |                       |                                              |                    |
| <b>CFQ English</b>       |                     |                     |                        |                         |                            |                |                      |                       |                                              |                    |
| Shoff 2014               | -                   | -                   | -                      | -                       | -                          | -              | -                    | -                     | -                                            | Adequate           |
| Tluczek 2011             | -                   | -                   | -                      | Very good               | -                          | -              | -                    | -                     | -                                            | Doubtful           |
| Tluczek 2013             | -                   | -                   | -                      | Very good               | -                          | -              | -                    | -                     | Doubtful                                     | -                  |
| <b>DISABKIDS-CFM</b>     |                     |                     |                        |                         |                            |                |                      |                       |                                              |                    |
| De souza dos Santos 2013 | -                   | Doubtful            | -                      | Very good               | -                          | -              | -                    | -                     | Very good                                    | -                  |
| De souza dos Santos 2014 | -                   | -                   | -                      | Very good               | -                          | Very good      | -                    | -                     | Adequate                                     | -                  |
| <b>CF Symptom Diary</b>  |                     |                     |                        |                         |                            |                |                      |                       |                                              |                    |
| Goss 2009                | Doubtful            | -                   | -                      | -                       | -                          | -              | -                    | -                     | -                                            | -                  |
| <b>CFRSD</b>             |                     |                     |                        |                         |                            |                |                      |                       |                                              |                    |
| Edwards 2018             | Adequate            | Adequate            | -                      | -                       | -                          | Very good      | -                    | -                     | Adequate                                     | -                  |

|                      | 1. PROM development | 2. Content validity | 3. Structural validity | 4. Internal consistency | 5. Cross cultural validity | 6. Reliability | 7. Measurement Error | 8. Criterion validity | 9. Hypothesis testing for construct validity | 10. Responsiveness |
|----------------------|---------------------|---------------------|------------------------|-------------------------|----------------------------|----------------|----------------------|-----------------------|----------------------------------------------|--------------------|
| <b>CFSPS</b>         |                     |                     |                        |                         |                            |                |                      |                       |                                              |                    |
| Norrish 2015         | Inadequate          | -                   | Adequate               | Doubtful                | -                          | -              | -                    | -                     | Doubtful                                     | -                  |
| <b>Res-CF</b>        |                     |                     |                        |                         |                            |                |                      |                       |                                              |                    |
| Ward 2016            | -                   | -                   | -                      | Very good               | -                          | Very good      | -                    | -                     | -                                            | Adequate           |
| <b>LCQ</b>           |                     |                     |                        |                         |                            |                |                      |                       |                                              |                    |
| <b>LCQ English</b>   |                     |                     |                        |                         |                            |                |                      |                       |                                              |                    |
| Ward 2016            | -                   | -                   | -                      | Very good               | -                          | Very good      | -                    | -                     | -                                            | Adequate           |
| <b>LCQ Spanish</b>   |                     |                     |                        |                         |                            |                |                      |                       |                                              |                    |
| Del Corral           | -                   | -                   | -                      | Very good               | -                          | Very good      | Adequate             | -                     | Adequate                                     | -                  |
| <b>LRSS</b>          |                     |                     |                        |                         |                            |                |                      |                       |                                              |                    |
| Trinick 2012         | -                   | -                   | -                      | Very good               | -                          | -              | -                    | -                     | Doubtful                                     | -                  |
| <b>SN-5</b>          |                     |                     |                        |                         |                            |                |                      |                       |                                              |                    |
| Chan 2016            | -                   | -                   | -                      | -                       | -                          | -              | -                    | -                     | Doubtful                                     | -                  |
| <b>HADS</b>          |                     |                     |                        |                         |                            |                |                      |                       |                                              |                    |
| Goldbeck 2010        | -                   | -                   | -                      | Very good               | -                          | -              | -                    | -                     | -                                            | Very good          |
| Yohannes 2012        | -                   | -                   | -                      | -                       | -                          | -              | -                    | -                     | Adequate                                     | -                  |
| <b>EQ-5D</b>         |                     |                     |                        |                         |                            |                |                      |                       |                                              |                    |
| <b>EQ-5D English</b> |                     |                     |                        |                         |                            |                |                      |                       |                                              |                    |
| Bradley 2013         | -                   | -                   | -                      | -                       | -                          | -              | -                    | -                     | Very good                                    | -                  |
| Solem 2016           | -                   | -                   | -                      | -                       | -                          | -              | -                    | -                     | -                                            | Adequate           |
| <b>EQ-5D German</b>  |                     |                     |                        |                         |                            |                |                      |                       |                                              |                    |
| Eidt Koch 2009       | -                   | -                   | -                      | -                       | -                          | -              | -                    | -                     | Adequate                                     | -                  |

1  
2  
3  
4  
5  
6  
7  
8  
9  
10  
11  
12  
13  
14  
15  
16  
17  
18  
19  
20  
21  
22  
23  
24  
25  
26  
27  
28  
29  
30  
31  
32  
33  
34  
35  
36  
37  
38  
39  
40  
41  
42  
43  
44  
45  
46

|                  | 1. PROM development | 2. Content validity | 3. Structural validity | 4. Internal consistency | 5. Cross cultural validity | 6. Reliability | 7. Measurement Error | 8. Criterion validity | 9. Hypothesis testing for construct validity | 10. Responsiveness |
|------------------|---------------------|---------------------|------------------------|-------------------------|----------------------------|----------------|----------------------|-----------------------|----------------------------------------------|--------------------|
| PedsQL           |                     |                     |                        |                         |                            |                |                      |                       |                                              |                    |
| Modi 2009        | -                   | -                   | -                      | -                       | -                          | -              | -                    | -                     | -                                            | Adequate           |
| SF-36            |                     |                     |                        |                         |                            |                |                      |                       |                                              |                    |
| Abbott 2009      | -                   | -                   | -                      | Very good               | -                          | -              | -                    | -                     | Doubtful                                     | -                  |
| Ricotti 2017     | -                   | -                   | -                      | Doubtful                | -                          | -              | -                    | -                     | -                                            | -                  |
| Uchmanowicz 2014 | -                   | -                   | -                      | -                       | -                          | -              | -                    | -                     | Adequate                                     | -                  |
| CORE-OM          |                     |                     |                        |                         |                            |                |                      |                       |                                              |                    |
| Platten 2013     | -                   | -                   | -                      | Very good               | -                          | -              | -                    | -                     | Very good                                    | -                  |
| UKSIP            |                     |                     |                        |                         |                            |                |                      |                       |                                              |                    |
| Salek 2012       | -                   | Doubtful            | -                      | Doubtful                | -                          | Adequate       | -                    | -                     | Adequate                                     | -                  |

# Reporting checklist for systematic review and meta-analysis.

Based on the PRISMA guidelines.

## Instructions to authors

Complete this checklist by entering the page numbers from your manuscript where readers will find each of the items listed below.

Your article may not currently address all the items on the checklist. Please modify your text to include the missing information. If you are certain that an item does not apply, please write "n/a" and provide a short explanation.

Upload your completed checklist as an extra file when you submit to a journal.

In your methods section, say that you used the PRISMA reporting guidelines, and cite them as:

Moher D, Liberati A, Tetzlaff J, Altman DG, The PRISMA Group. Preferred Reporting Items for Systematic Reviews and Meta-Analyses: The PRISMA Statement

|              | Reporting Item                                                                         | Page Number |
|--------------|----------------------------------------------------------------------------------------|-------------|
| <b>Title</b> |                                                                                        |             |
|              | <a href="#">#1</a> Identify the report as a systematic review, meta-analysis, or both. | 1           |

## Abstract

|    |                      |                    |                                                                 |     |
|----|----------------------|--------------------|-----------------------------------------------------------------|-----|
| 1  | Structured           | <a href="#">#2</a> | Provide a structured summary including, as applicable:          | 2   |
| 2  |                      |                    |                                                                 |     |
| 3  | summary              |                    | background; objectives; data sources; study eligibility         |     |
| 4  |                      |                    | criteria, participants, and interventions; study appraisal and  |     |
| 5  |                      |                    | synthesis methods; results; limitations; conclusions and        |     |
| 6  |                      |                    | implications of key findings; systematic review registration    |     |
| 7  |                      |                    | number                                                          |     |
| 8  |                      |                    |                                                                 |     |
| 9  |                      |                    |                                                                 |     |
| 10 |                      |                    |                                                                 |     |
| 11 |                      |                    |                                                                 |     |
| 12 |                      |                    |                                                                 |     |
| 13 |                      |                    |                                                                 |     |
| 14 |                      |                    |                                                                 |     |
| 15 | <b>Introduction</b>  |                    |                                                                 |     |
| 16 |                      |                    |                                                                 |     |
| 17 |                      |                    |                                                                 |     |
| 18 |                      |                    |                                                                 |     |
| 19 | Rationale            | <a href="#">#3</a> | Describe the rationale for the review in the context of what    | 5   |
| 20 |                      |                    | is already known.                                               |     |
| 21 |                      |                    |                                                                 |     |
| 22 |                      |                    |                                                                 |     |
| 23 |                      |                    |                                                                 |     |
| 24 | Objectives           | <a href="#">#4</a> | Provide an explicit statement of questions being addressed      | 6   |
| 25 |                      |                    | with reference to participants, interventions, comparisons,     |     |
| 26 |                      |                    | outcomes, and study design (PICOS).                             |     |
| 27 |                      |                    |                                                                 |     |
| 28 |                      |                    |                                                                 |     |
| 29 |                      |                    |                                                                 |     |
| 30 |                      |                    |                                                                 |     |
| 31 |                      |                    |                                                                 |     |
| 32 | <b>Methods</b>       |                    |                                                                 |     |
| 33 |                      |                    |                                                                 |     |
| 34 |                      |                    |                                                                 |     |
| 35 | Protocol and         | <a href="#">#5</a> | Indicate if a review protocol exists, if and where it can be    | 6   |
| 36 | registration         |                    | accessed (e.g., Web address) and, if available, provide         |     |
| 37 |                      |                    | registration information including the registration number.     |     |
| 38 |                      |                    |                                                                 |     |
| 39 |                      |                    |                                                                 |     |
| 40 |                      |                    |                                                                 |     |
| 41 |                      |                    |                                                                 |     |
| 42 | Eligibility criteria | <a href="#">#6</a> | Specify study characteristics (e.g., PICOS, length of follow-   | 6-7 |
| 43 |                      |                    | up) and report characteristics (e.g., years considered,         |     |
| 44 |                      |                    | language, publication status) used as criteria for eligibility, |     |
| 45 |                      |                    | giving rational                                                 |     |
| 46 |                      |                    |                                                                 |     |
| 47 |                      |                    |                                                                 |     |
| 48 |                      |                    |                                                                 |     |
| 49 |                      |                    |                                                                 |     |
| 50 |                      |                    |                                                                 |     |
| 51 |                      |                    |                                                                 |     |
| 52 | Information          | <a href="#">#7</a> | Describe all information sources in the search (e.g.,           | 7   |
| 53 | sources              |                    | databases with dates of coverage, contact with study            |     |
| 54 |                      |                    |                                                                 |     |
| 55 |                      |                    |                                                                 |     |
| 56 |                      |                    |                                                                 |     |
| 57 |                      |                    |                                                                 |     |
| 58 |                      |                    |                                                                 |     |
| 59 |                      |                    |                                                                 |     |
| 60 |                      |                    |                                                                 |     |

|    |                    |                                                                                  |            |
|----|--------------------|----------------------------------------------------------------------------------|------------|
| 1  |                    | authors to identify additional studies) and date last                            |            |
| 2  |                    | searched.                                                                        |            |
| 3  |                    |                                                                                  |            |
| 4  |                    |                                                                                  |            |
| 5  |                    |                                                                                  |            |
| 6  | Search             | <a href="#">#8</a> Present full electronic search strategy for at least one      | Supplement |
| 7  |                    |                                                                                  |            |
| 8  |                    | database, including any limits used, such that it could be                       | 1          |
| 9  |                    |                                                                                  |            |
| 10 |                    | repeated.                                                                        |            |
| 11 |                    |                                                                                  |            |
| 12 |                    |                                                                                  |            |
| 13 | Study selection    | <a href="#">#9</a> State the process for selecting studies (i.e., for screening, | 7          |
| 14 |                    |                                                                                  |            |
| 15 |                    | for determining eligibility, for inclusion in the systematic                     |            |
| 16 |                    | review, and, if applicable, for inclusion in the meta-                           |            |
| 17 |                    | analysis).                                                                       |            |
| 18 |                    |                                                                                  |            |
| 19 |                    |                                                                                  |            |
| 20 |                    |                                                                                  |            |
| 21 |                    |                                                                                  |            |
| 22 |                    |                                                                                  |            |
| 23 | Data collection    | <a href="#">#10</a> Describe the method of data extraction from reports (e.g.,   | 7          |
| 24 |                    |                                                                                  |            |
| 25 | process            | piloted forms, independently by two reviewers) and any                           |            |
| 26 |                    |                                                                                  |            |
| 27 |                    | processes for obtaining and confirming data from                                 |            |
| 28 |                    |                                                                                  |            |
| 29 |                    | investigators.                                                                   |            |
| 30 |                    |                                                                                  |            |
| 31 |                    |                                                                                  |            |
| 32 |                    |                                                                                  |            |
| 33 | Data items         | <a href="#">#11</a> List and define all variables for which data were sought     | 7          |
| 34 |                    |                                                                                  |            |
| 35 |                    | (e.g., PICOS, funding sources), and any assumptions and                          |            |
| 36 |                    |                                                                                  |            |
| 37 |                    | simplifications made.                                                            |            |
| 38 |                    |                                                                                  |            |
| 39 |                    |                                                                                  |            |
| 40 |                    |                                                                                  |            |
| 41 | Risk of bias in    | <a href="#">#12</a> Describe methods used for assessing risk of bias in          | 7          |
| 42 |                    |                                                                                  |            |
| 43 | individual studies | individual studies (including specification of whether this                      |            |
| 44 |                    |                                                                                  |            |
| 45 |                    | was done at the study or outcome level, or both), and how                        |            |
| 46 |                    |                                                                                  |            |
| 47 |                    | this information is to be used in any data synthesis.                            |            |
| 48 |                    |                                                                                  |            |
| 49 |                    |                                                                                  |            |
| 50 |                    |                                                                                  |            |
| 51 | Summary            | <a href="#">#13</a> State the principal summary measures (e.g., risk ratio,      | NA         |
| 52 |                    |                                                                                  |            |
| 53 | measures           | difference in means).                                                            |            |
| 54 |                    |                                                                                  |            |
| 55 |                    |                                                                                  |            |
| 56 |                    |                                                                                  |            |
| 57 |                    |                                                                                  |            |
| 58 |                    |                                                                                  |            |
| 59 |                    |                                                                                  |            |
| 60 |                    |                                                                                  |            |

|    |                    |                     |                                                               |            |
|----|--------------------|---------------------|---------------------------------------------------------------|------------|
| 1  | Planned            | <a href="#">#14</a> | Describe the methods of handling data and combining           | 7          |
| 2  |                    |                     |                                                               |            |
| 3  | methods of         |                     | results of studies, if done, including measures of            |            |
| 4  |                    |                     |                                                               |            |
| 5  | analysis           |                     | consistency (e.g., I <sup>2</sup> ) for each meta-analysis.   |            |
| 6  |                    |                     |                                                               |            |
| 7  |                    |                     |                                                               |            |
| 8  |                    |                     |                                                               |            |
| 9  | Risk of bias       | <a href="#">#15</a> | Specify any assessment of risk of bias that may affect the    | NA         |
| 10 |                    |                     |                                                               |            |
| 11 | across studies     |                     | cumulative evidence (e.g., publication bias, selective        |            |
| 12 |                    |                     | reporting within studies).                                    |            |
| 13 |                    |                     |                                                               |            |
| 14 |                    |                     |                                                               |            |
| 15 |                    |                     |                                                               |            |
| 16 | Additional         | <a href="#">#16</a> | Describe methods of additional analyses (e.g., sensitivity or | NA         |
| 17 |                    |                     |                                                               |            |
| 18 | analyses           |                     | subgroup analyses, meta-regression), if done, indicating      |            |
| 19 |                    |                     | which were pre-specified.                                     |            |
| 20 |                    |                     |                                                               |            |
| 21 |                    |                     |                                                               |            |
| 22 |                    |                     |                                                               |            |
| 23 |                    |                     |                                                               |            |
| 24 | <b>Results</b>     |                     |                                                               |            |
| 25 |                    |                     |                                                               |            |
| 26 |                    |                     |                                                               |            |
| 27 | Study selection    | <a href="#">#17</a> | Give numbers of studies screened, assessed for eligibility,   | 8          |
| 28 |                    |                     |                                                               |            |
| 29 |                    |                     | and included in the review, with reasons for exclusions at    |            |
| 30 |                    |                     | each stage, ideally with a <a href="#">flow diagram</a> .     |            |
| 31 |                    |                     |                                                               |            |
| 32 |                    |                     |                                                               |            |
| 33 |                    |                     |                                                               |            |
| 34 |                    |                     |                                                               |            |
| 35 | Study              | <a href="#">#18</a> | For each study, present characteristics for which data were   | Supplement |
| 36 |                    |                     |                                                               |            |
| 37 | characteristics    |                     | extracted (e.g., study size, PICOS, follow-up period) and     | 3          |
| 38 |                    |                     | provide the citation.                                         |            |
| 39 |                    |                     |                                                               |            |
| 40 |                    |                     |                                                               |            |
| 41 |                    |                     |                                                               |            |
| 42 | Risk of bias       | <a href="#">#19</a> | Present data on risk of bias of each study and, if available, | Supplement |
| 43 |                    |                     |                                                               |            |
| 44 | within studies     |                     | any outcome-level assessment (see Item 12).                   | 2          |
| 45 |                    |                     |                                                               |            |
| 46 |                    |                     |                                                               |            |
| 47 |                    |                     |                                                               |            |
| 48 | Results of         | <a href="#">#20</a> | For all outcomes considered (benefits and harms), present,    | NA         |
| 49 |                    |                     |                                                               |            |
| 50 | individual studies |                     | for each study: (a) simple summary data for each              |            |
| 51 |                    |                     |                                                               |            |
| 52 |                    |                     | intervention group and (b) effect estimates and confidence    |            |
| 53 |                    |                     | intervals, ideally with a forest plot.                        |            |
| 54 |                    |                     |                                                               |            |
| 55 |                    |                     |                                                               |            |
| 56 |                    |                     |                                                               |            |
| 57 |                    |                     |                                                               |            |
| 58 |                    |                     |                                                               |            |
| 59 |                    |                     |                                                               |            |
| 60 |                    |                     |                                                               |            |

|    |                   |                     |                                                                 |       |
|----|-------------------|---------------------|-----------------------------------------------------------------|-------|
| 1  | Synthesis of      | <a href="#">#21</a> | Present the main results of the review. If meta-analyses are    | 9-16  |
| 2  |                   |                     |                                                                 |       |
| 3  | results           |                     | done, include for each, confidence intervals and measures       |       |
| 4  |                   |                     |                                                                 |       |
| 5  |                   |                     | of consistency.                                                 |       |
| 6  |                   |                     |                                                                 |       |
| 7  |                   |                     |                                                                 |       |
| 8  |                   |                     |                                                                 |       |
| 9  | Risk of bias      | <a href="#">#22</a> | Present results of any assessment of risk of bias across        | 16    |
| 10 |                   |                     |                                                                 |       |
| 11 | across studies    |                     | studies (see Item 15).                                          |       |
| 12 |                   |                     |                                                                 |       |
| 13 |                   |                     |                                                                 |       |
| 14 | Additional        | <a href="#">#23</a> | Give results of additional analyses, if done (e.g., sensitivity | NA    |
| 15 |                   |                     |                                                                 |       |
| 16 | analysis          |                     | or subgroup analyses, meta-regression [see Item 16]).           |       |
| 17 |                   |                     |                                                                 |       |
| 18 |                   |                     |                                                                 |       |
| 19 | <b>Discussion</b> |                     |                                                                 |       |
| 20 |                   |                     |                                                                 |       |
| 21 |                   |                     |                                                                 |       |
| 22 | Summary of        | <a href="#">#24</a> | Summarize the main findings, including the strength of          | 17-18 |
| 23 |                   |                     |                                                                 |       |
| 24 | Evidence          |                     | evidence for each main outcome; consider their relevance        |       |
| 25 |                   |                     |                                                                 |       |
| 26 |                   |                     | to key groups (e.g., health care providers, users, and policy   |       |
| 27 |                   |                     |                                                                 |       |
| 28 |                   |                     | makers                                                          |       |
| 29 |                   |                     |                                                                 |       |
| 30 |                   |                     |                                                                 |       |
| 31 |                   |                     |                                                                 |       |
| 32 | Limitations       | <a href="#">#25</a> | Discuss limitations at study and outcome level (e.g., risk of   | 19    |
| 33 |                   |                     |                                                                 |       |
| 34 |                   |                     | bias), and at review level (e.g., incomplete retrieval of       |       |
| 35 |                   |                     |                                                                 |       |
| 36 |                   |                     | identified research, reporting bias).                           |       |
| 37 |                   |                     |                                                                 |       |
| 38 |                   |                     |                                                                 |       |
| 39 |                   |                     |                                                                 |       |
| 40 | Conclusions       | <a href="#">#26</a> | Provide a general interpretation of the results in the context  | 20    |
| 41 |                   |                     |                                                                 |       |
| 42 |                   |                     | of other evidence, and implications for future research.        |       |
| 43 |                   |                     |                                                                 |       |
| 44 |                   |                     |                                                                 |       |
| 45 | <b>Funding</b>    |                     |                                                                 |       |
| 46 |                   |                     |                                                                 |       |
| 47 |                   |                     |                                                                 |       |
| 48 | Funding           | <a href="#">#27</a> | Describe sources of funding or other support (e.g., supply of   | 20    |
| 49 |                   |                     |                                                                 |       |
| 50 |                   |                     | data) for the systematic review; role of funders for the        |       |
| 51 |                   |                     |                                                                 |       |
| 52 |                   |                     | systematic review.                                              |       |
| 53 |                   |                     |                                                                 |       |
| 54 |                   |                     |                                                                 |       |
| 55 |                   |                     |                                                                 |       |
| 56 | Notes:            |                     |                                                                 |       |
| 57 |                   |                     |                                                                 |       |
| 58 |                   |                     |                                                                 |       |
| 59 |                   |                     |                                                                 |       |
| 60 |                   |                     |                                                                 |       |



- 1 • 8: Supplement 1
- 2
- 3
- 4 • 18: Supplement 3
- 5
- 6
- 7 • 19: Supplement 2 The PRISMA checklist is distributed under the terms of the Creative Commons
- 8 Attribution License CC-BY. This checklist was completed on 26. August 2019 using
- 9 <https://www.goodreports.org/>, a tool made by the [EQUATOR Network](#) in collaboration with
- 10
- 11 [Penelope.ai](#)
- 12
- 13
- 14
- 15
- 16
- 17
- 18
- 19
- 20
- 21
- 22
- 23
- 24
- 25
- 26
- 27
- 28
- 29
- 30
- 31
- 32
- 33
- 34
- 35
- 36
- 37
- 38
- 39
- 40
- 41
- 42
- 43
- 44
- 45
- 46
- 47
- 48
- 49
- 50
- 51
- 52
- 53
- 54
- 55
- 56
- 57
- 58
- 59
- 60
