# Supplementary material for: A systematic review of patient-reported outcome measures (PROMs) in cystic fibrosis
Source: PubMed Central journal article supplement — BMJ Open. 2020 Oct 1;10(10):e033867. doi: 10.1136/bmjopen-2019-033867 (PMC7534676; doi:10.1136/bmjopen-2019-033867), 2020-10-01
Supplement: bmjopen-2019-033867supp001.pdf [file bmjopen-2019-033867supp001.pdf]

## Supplementary File 1: Complete search strategy

|                 |                                                                                                                            |
|-----------------|----------------------------------------------------------------------------------------------------------------------------|
| <b>Database</b> | <b>OVID MEDLINE</b>                                                                                                        |
| <b>Strategy</b> | <b>#1 OR #2 AND #3</b><br>Limit English language and humans and last 10 years                                              |
| #1              | Patient Reported Outcome Measures/exp OR "Surveys and Questionnaires/exp OR Self Report/exp or Perception/exp OR scale.mp  |
| #2              | "Quality of Life"/exp OR QOL.mp OR "health related quality of life". mp                                                    |
| #3              | Cystic Fibrosis/exp                                                                                                        |
| <b>Database</b> | <b>PsycINFO</b>                                                                                                            |
| <b>Strategy</b> | <b>#1 OR #2 AND #3</b><br>Limit English language and humans and last 10 years                                              |
| #1              | Patient reported outcome.mp OR Self Report/exp OR Client Attitudes/exp OR Questionnaires/exp OR Perception/exp OR scale.mp |
| #2              | "Quality of Life"/exp OR QOL.mp                                                                                            |
| #3              | Cystic Fibrosis/ exp                                                                                                       |
| <b>Database</b> | <b>Scopus</b>                                                                                                              |
| <b>Strategy</b> | <b>#1 OR #2 AND #3</b><br>Limit English language and Publication Year 2009 – 2019 and Final Publication                    |
| #1              | patient AND reported AND outcome* OR self-report* OR questionnaire OR scale OR perception                                  |
| #2              | quality AND of AND life                                                                                                    |
| #3              | cystic AND fibrosis                                                                                                        |
| <b>Database</b> | <b>Embase</b>                                                                                                              |
| <b>Strategy</b> | <b>#1 OR #2 AND #3</b><br>Limit English language and humans and last 10 years                                              |
| #1              | Patient-reported outcome/exp OR questionnaire/exp OR self report/exp or perception/exp OR scale.mp                         |
| #2              | Quality of life/exp OR QOL.mp                                                                                              |
| #3              | Cystic Fibrosis/ exp                                                                                                       |
| <b>Database</b> | <b>Cochrane</b>                                                                                                            |
| <b>Strategy</b> | <b>#1 OR #2 AND #3</b><br>Limit English language and humans and last 10 years                                              |
| #1              | Patient Reported Outcome Measures/exp OR Self Report/exp OR Survey and Questionnaires/exp                                  |

|                 |    |                                                                                                  |
|-----------------|----|--------------------------------------------------------------------------------------------------|
|                 | #2 | Quality of Life/exp                                                                              |
|                 | #3 | Cystic Fibrosis/ exp                                                                             |
| <b>Database</b> |    | <b>CINAHL</b>                                                                                    |
| <b>Strategy</b> |    | <b>#1 OR #2 AND #3</b><br>Limit English language and Publication Year 2009 - 2019                |
|                 | #1 | "Patient-reported Outcome Measures" OR "Self Report+" OR "Patient Attitudes" OR "Questionnaires" |
|                 | #2 | "Quality of Life+"                                                                               |
|                 | #3 | "Cystic Fibrosis"                                                                                |
