# Supplementary material for: A systematic review of patient-reported outcome measures (PROMs) in cystic fibrosis
Source: PubMed Central journal article supplement — BMJ Open. 2020 Oct 1;10(10):e033867. doi: 10.1136/bmjopen-2019-033867 (PMC7534676; doi:10.1136/bmjopen-2019-033867), 2020-10-01
Supplement: bmjopen-2019-033867supp002.pdf [file bmjopen-2019-033867supp002.pdf]

## Supplementary File 2: Data Extraction Table

| Author                     | Type of study      | Setting           | Patient group | Age mean (SD) | Population size, n | Instruments    | Type of PROM        | Why PROM used?                                    | Method of administration | Timepoints                              |
|----------------------------|--------------------|-------------------|---------------|---------------|--------------------|----------------|---------------------|---------------------------------------------------|--------------------------|-----------------------------------------|
| Abbott et al, 2009, UK     | Prospective cohort | Inpatient         | All Age       | 25.1 (7.1)    | 223                | CFQOL<br>SF-36 | Specific<br>Generic | HRQOL as a predictor                              | Not stated               | At entry                                |
| Abbott et al, 2013, UK     | Longitudinal       | Outpatient Clinic | All Age       | Not stated    | 234                | CFQOL          | Specific            | Association between physical factors and HRQOL    | Postal                   | 7 assessments<br>2 yearly over 12 years |
| Abbott et al, 2015, UK     | Longitudinal       | Outpatient Clinic | All Age       | 28.5 (8.2)    | 234                | CFQOL          | Specific            | Association between demographic factors and HRQOL | Postal                   | 7 assessments<br>2 yearly over 12 years |
| Acaster et al, 2015, UK    | Cross-sectional    | National database | Adult         | 28.7 (8.88)   | 401                | CFQ-R          | Specific            | Used to validate another PROM                     | Online                   | At entry                                |
|                            |                    |                   |               |               |                    | EQ-5D          | Generic             | Economic evaluation                               |                          |                                         |
| Aguiar et al, 2017, Brazil | Cross-sectional    | Outpatient Clinic | Adult         | Not stated    | 52                 | CFQ            | Specific            | Correlate to another PROM                         | Software program         | At entry                                |
| Alpern et al, 2015, US     | Validation         | RCT data          | Child         | 2.28 (1.45)   | 314                | CFQ-R Parent   | Specific            | Validate PROM in new age group                    | Not stated               | 5 assessments<br>12 weeks apart         |
| Angelis et al, 2015, UK    | Cross-sectional    | National database | All Age       | 18.3 (15.1)   | 74                 | EQ-5D          | Generic             | HRQOL in a population                             | Postal and online        | At entry                                |
| Ashish et al, 2012, UK     | Cross-sectional    | Outpatient Clinic | Adult         | Not stated    | 157                | CFQ-R          | Specific            | Association between physical factors and HRQOL    | Paper                    | At entry                                |

| Author                                             | Type of study   | Setting           | Patient group | Age mean (SD) | Population size, n | Instruments | Type of PROM | Why PROM used?                                 | Method of administration | Timepoints                      |
|----------------------------------------------------|-----------------|-------------------|---------------|---------------|--------------------|-------------|--------------|------------------------------------------------|--------------------------|---------------------------------|
| Backstrom-Eriksson et al, 2016, Sweden             | Cross-sectional | Outpatient Clinic | Adult         | 32.2          | 68                 | CFQ-R       | Specific     | Association between physical factors and HRQOL | Paper                    | At entry                        |
|                                                    |                 |                   |               |               |                    | HADS        | Generic      | Association between physical factors and HRQOL | Paper                    |                                 |
| Bhati et al, 2012, US                              | Longitudinal    | Inpatient         | Child         | 13.1 (3.8)    | 22                 | CFQ-R       | Specific     | Correlate to diagnostic test                   | Not stated               | 3 assessments<br>1 week apart   |
| Blackwell et al, 2013, US                          | Longitudinal    | RCT data          | Child         | 15.8 (2.9)    | 95                 | CFQ-R       | Specific     | Association between physical factors and HRQOL | Not stated               | 3 assessments<br>3 months apart |
| Bodnar et al, 2014, Hungary                        | Cross-sectional | Outpatient Clinic | All Age       | 14.3 (4.81)   | 59                 | CFQ-R       | Specific     | Association between physical factors and HRQOL | Not stated               | At entry                        |
| Bodnar et al, 2015, Hungary                        | Cross-sectional | Outpatient Clinic | Child         | 11.61 (2.56)  | 172                | PedsQL      | Generic      | Association between physical factors and HRQOL | Not stated               | At entry                        |
| Borawska-Kowalczyk et al, 2015, Poland             | Cross-sectional | Outpatient Clinic | Child         | 14.41 (2.61)  | 70                 | CFQ-R       | Specific     | Association between physical factors and HRQOL | Not stated               | At entry                        |
| Borawska-Kowalczyk et al, 2015, Poland and Hungary | Cross-sectional | Outpatient Clinic | Child         | 13.63 (2.93)  | 141                | CFQ-R       | Specific     | HRQOL in a population                          | Not stated               | At entry                        |

| Author                              | Type of study                 | Setting                                            | Patient group | Age mean (SD) | Population size, n | Instruments | Type of PROM | Why PROM used?                                 | Method of administration | Timepoints                    |
|-------------------------------------|-------------------------------|----------------------------------------------------|---------------|---------------|--------------------|-------------|--------------|------------------------------------------------|--------------------------|-------------------------------|
| Bouka et al, 2012, Germany          | Cross-sectional               | Outpatient Clinic                                  | Adult         | 34.4 (7.5)    | 55                 | CFQ-R       | Specific     | Association between physical factors and HRQOL | Not stated               | At entry                      |
| Bradley et al, 2013, UK             | Longitudinal                  | Not stated                                         | All Age       | 28.5 (8.2)    | 94                 | EQ-5D       | Generic      | Economic evaluation                            | Not stated               | At entry and 8-12 weeks later |
|                                     |                               |                                                    |               |               |                    | CFQ-R       | Specific     | Correlate to another PROM                      | Not stated               |                               |
| Cavanaugh et al, 2016, US           | Cross-sectional               | Outpatient Clinic                                  | Child         | 11.6 (3.6)    | 50                 | CFQ-R       | Specific     | Association between physical factors and HRQOL | Not stated               | At entry                      |
| Chan et al, 2016, US                | Cross-sectional               | Outpatient Clinic                                  | Child         | 12.9 (5.6)    | 47                 | SN-5        | Respiratory  | Association between physical factors and HRQOL | Paper                    | At entry                      |
| Chevreur et al, 2015, France        | Retrospective cross-sectional | Outpatient Clinic, CF Society, patient association | All Age       | 15.4 (11.3)   | 240                | EQ-5D       | Generic      | HRQOL in a population                          | Online                   | At entry                      |
| Chevreur et al, 2016, Multinational | Cross-sectional               | Outpatient Clinic, national registries             | All Age       | 18.5 (14.1)   | 905                | EQ-5D       | Generic      | HRQOL in a population                          | Postal or Online         | At entry                      |
| Cohen et al, 2010, Brazil           | Cross-sectional               | Outpatient Clinic                                  | All Age       | 12.5 (5.1)    | 75                 | CFQ         | Specific     | HRQOL in a population                          | Paper and Interview      | Not stated                    |
| Cronly et al, 2019, Ireland         | Cross-sectional               | Outpatient Clinic                                  | Adult         | 30.5 (9.1)    | 147                | HADS        | Generic      | Association between psychological              | Paper and Online         | At entry                      |

| Author                                        | Type of study   | Setting           | Patient group | Age mean (SD) | Population size, n | Instruments   | Type of PROM | Why PROM used?                                      | Method of administration | Timepoints                  |
|-----------------------------------------------|-----------------|-------------------|---------------|---------------|--------------------|---------------|--------------|-----------------------------------------------------|--------------------------|-----------------------------|
|                                               |                 |                   |               |               |                    |               |              | factors and HRQOL                                   |                          |                             |
|                                               |                 |                   |               |               |                    | CFQ-R         | Specific     | Association between psychological factors and HRQOL | Paper and Online         | At entry                    |
| Debska et al, 2014, Poland                    | Cross-sectional | Outpatient Clinic | Adult         | Not stated    | 45                 | CFQOL         | Specific     | Association between physical factors and HRQOL      | Not stated               | At entry                    |
| Debska et al, 2015, Poland                    | Longitudinal    | Inpatient         | All Age       | 21.1 (5.1)    | 67                 | CFQOL         | Specific     | Association between physical factors and HRQOL      | Not stated               | At entry and one year later |
| del Corral et al, 2016, Spain                 | Validation      | Inpatient         | Child         | 11.7 (3.1)    | 58                 | LCQ           | Respiratory  | Validate PROM                                       | Not stated               | At entry and 2 weeks later  |
| de Souza Serio dos Santos et al, 2013, Brazil | Validation      | Not stated        | Child         | Not stated    | 51                 | DISABKIDS-CFM | Specific     | Validate PROM                                       | Not stated               | At entry                    |
| de Souza Serio dos Santos et al, 2014, Brazil | Validation      | Outpatient Clinic | Child         | 11.91 (2.79)  | 113                | DISABKIDS-CFM | Specific     | Validate PROM                                       | Not stated               | At entry and 3 months later |
| Dill et al, 2013, US                          | Longitudinal    | Outpatient Clinic | Adult         | 32.52 (10.65) | 333                | CFQ-R         | Specific     | Examine trends in HRQOL over time                   | Postal                   | 7 assessments 3 monthly     |

| Author                         | Type of study                 | Setting           | Patient group | Age mean (SD) | Population size, n | Instruments | Type of PROM | Why PROM used?                                 | Method of administration | Timepoints                                      |
|--------------------------------|-------------------------------|-------------------|---------------|---------------|--------------------|-------------|--------------|------------------------------------------------|--------------------------|-------------------------------------------------|
| Driscoll et al, 2015, US       | Cross-sectional               | RCT data          | Child         | 3.82 (1.27)   | 73                 | CFQ-R       | Specific     | Association between social factors and HRQOL   | Not stated               | At entry                                        |
|                                |                               |                   |               |               |                    | PedsQL      | Generic      | Validate PROM in new age group                 |                          |                                                 |
| Edwards et al, 2018, US        | Qualitative                   | Outpatient Clinic | Child         | Not stated    | 37                 | CFRSD       | Specific     | Develop PROM                                   | Online                   | At entry                                        |
| Eidt-Koch et al, 2009, Germany | Cross-sectional               | Outpatient Clinic | Child         | Not stated    | 96                 | EQ-5D       | Generic      | Validate PROM                                  | Not stated               | At entry                                        |
|                                |                               |                   |               |               |                    | CFQ         | Specific     | Used to validate another PROM                  |                          |                                                 |
| Flume et al, 2018, US          | Retrospective cross-sectional | RCT data          | All Age       | Not stated    | 80                 | CFQ-R       | Specific     | Association between physical factors and HRQOL | Paper                    | 6 assessments<br>Baseline, week 2, 4, 8, 16, 24 |
| Forte et al, 2015, Brazil      | Cross-sectional               | Outpatient Clinic | Adult         | 25.1 (8.8)    | 51                 | WHOQOL-BREF | Generic      | Association between physical factors and HRQOL | Not stated               | At entry                                        |
|                                |                               |                   |               |               |                    | CFQOL       | Specific     | Association between physical factors and HRQOL |                          |                                                 |
| Gancz et al, 2018, Brazil      | Cross-sectional               | Outpatient Clinic | Child         | 16.4 (2.3)    | 31                 | CFQ-R       | Specific     | Association between physical factors and HRQOL | Interview                | At entry                                        |
| Goldbeck et al, 2010, Germany  | Cross-sectional               | Outpatient Clinic | All Age       | 23.1 (9.1)    | 670                | HADS        | Generic      | HRQOL in a population                          | Not stated               | At entry                                        |

| Author                          | Type of study                | Setting                  | Patient group | Age mean (SD) | Population size, n | Instruments      | Type of PROM | Why PROM used?                                            | Method of administration | Timepoints                   |
|---------------------------------|------------------------------|--------------------------|---------------|---------------|--------------------|------------------|--------------|-----------------------------------------------------------|--------------------------|------------------------------|
| Goss et al, 2009, US            | Qualitative                  | Outpatient Clinic        | All Age       | 12.1 (4)      | 15                 | CF Symptom Diary | Specific     | Develop PROM                                              | Not administered         | Not administered             |
| Groeneveld et al, 2012, Spain   | Cross-sectional              | Outpatient Clinic        | Child         | 11.6 (3.1)    | 28                 | CFQ-R            | Specific     | Association between social and physical factors and HRQOL | Paper and Interview      | At entry                     |
| Habib et al, 2015, Canada       | Cross-sectional              | Outpatient Clinic        | Adult         | 34.9 (11.9)   | 103                | CFQ-R            | Specific     | Association between physical factors and HRQOL            | Paper                    | At entry                     |
| Havermans et al, 2009, Belgium  | Cross-sectional              | Outpatient Clinic        | Adult         | 26.79 (8.15)  | 57                 | CFQ-R            | Specific     | Association between social factors and HRQOL              | Not stated               | At entry                     |
| Hebestreit et al, 2014, Germany | Non-randomised control trial | Outpatient Clinic        | All Age       | 20.6 (5.8)    | 70                 | CFQ-R            | Specific     | Association between physical factors and HRQOL            | Paper                    | At entry and 6 months        |
| Hegarty et al, 2009, Australia  | Cross-sectional              | Outpatient and Inpatient | Child         | 12.06 (3.97)  | 33                 | CFQ-R            | Specific     | HRQOL in a population                                     | Not stated               | At entry                     |
| Hochwalder et al, 2017, Sweden  | Validation                   | Outpatient Clinic        | Adult         | 30.8 (11.98)  | 173                | CFQ-R            | Specific     | Validate PROM                                             | Not stated               | At entry                     |
| Horck et al, 2017, Netherlands  | Longitudinal                 | Outpatient Clinic        | Child         | 10.3 (3.6)    | 49                 | CFQ-R            | Specific     | Association between physical factors and HRQOL            | Paper and Interview      | 3 assessments 6 months apart |
| Ihle et al, 2015, Germany       | Cross-sectional              | Outpatient Clinic        | Adult         | 50 (11.9)     | 152                | SF-36            | Generic      | Association between physical and demographic              | Paper                    | At entry                     |

| Author                           | Type of study   | Setting                  | Patient group | Age mean (SD) | Population size, n | Instruments | Type of PROM | Why PROM used?                                                 | Method of administration | Timepoints |
|----------------------------------|-----------------|--------------------------|---------------|---------------|--------------------|-------------|--------------|----------------------------------------------------------------|--------------------------|------------|
|                                  |                 |                          |               |               |                    |             |              | factors and HRQOL                                              |                          |            |
|                                  |                 |                          |               |               |                    | SGRQ        | Respiratory  | Association between physical and demographic factors and HRQOL |                          |            |
|                                  |                 |                          |               |               |                    | PLC         | Generic      | Association between physical and demographic factors and HRQOL |                          |            |
| Iscar-Urrutia et al, 2018, Spain | Cross-sectional | Outpatient Clinic        | Adult         | 32            | 23                 | CFQ-R       | Specific     | Association between physical factors and HRQOL                 | Paper                    | At entry   |
| Kang et al, 2017, Brazil         | Cross-sectional | Outpatient Clinic        | All Age       | 25.71 (8.13)  | 91                 | SNOT-22     | Respiratory  | Association between physical factors and HRQOL                 | Not stated               | At entry   |
| Kelemen et al, 2011, Australia   | Cross-sectional | Outpatient Clinic        | Adult         | 29.4 (8.5)    | 73                 | CFQOL       | Specific     | Association between physical factors and HRQOL                 | Not stated               | At entry   |
| Kianifar et al, 2013, Iran       | Cross-sectional | Outpatient Clinic        | Child         | 5 (3.4)       | 36                 | PedsQL      | Generic      | HRQOL in a population                                          | Not stated               | Not stated |
| Kilcoyne et al, 2016             | Cross-sectional | Outpatient and Inpatient | Adult         | 27.8 (7.9)    | 101                | CFQ-R       | Specific     | Correlate to diagnostic test                                   | Paper                    | At entry   |

| Author                     | Type of study      | Setting              | Patient group | Age mean (SD) | Population size, n | Instruments | Type of PROM | Why PROM used?                                      | Method of administration | Timepoints                   |
|----------------------------|--------------------|----------------------|---------------|---------------|--------------------|-------------|--------------|-----------------------------------------------------|--------------------------|------------------------------|
| Kir et al, 2015, India     | Cross-sectional    | Inpatient            | Child         | 11.5 (4.5)    | 59                 | CFQ-R       | Specific     | HRQOL in a population                               | Paper and Interview      | At entry                     |
| Lectzin et al, 2016, US    | Cross-sectional    | Outpatient Clinic    | Child         | 15.6 (2.5)    | 73                 | CFQ-R       | Specific     | Association between physical factors and HRQOL      | Online                   | At entry                     |
| McHugh et al, 2016, UK     | Cross-sectional    | Online Support Group | Adult         | 29 (8.34)     | 122                | CFQ-R       | Specific     | Association between psychological factors and HRQOL | Not stated               | Not stated                   |
| Modi et al, 2009, US       | Prospective cohort | Inpatient            | Child         | 13.6 (3.7)    | 52                 | PedsQL      | Generic      | HRQOL as outcome of intervention                    | Paper                    | At entry and 2 weeks later   |
|                            |                    |                      |               |               |                    | CFQ-R       | Specific     | HRQOL as outcome of intervention                    |                          |                              |
| Norrish et al, 2015, Oman  | Development        | Outpatient Clinic    | Child         | 6             | 12                 | CF-SPS      | Specific     | Develop PROM                                        | Interview                | Not stated                   |
| Oliver et al, 2015, US     | Longitudinal       | Outpatient Clinic    | All Age       | 19 (3.2)      | 71                 | HADS        | Generic      | Association between social factors and HRQOL        | Paper and Online         | 3 assessments 6 months apart |
|                            |                    |                      |               |               |                    | CFQ-R       | Specific     | Association between social factors and HRQOL        |                          |                              |
| Olveira et al, 2016, Spain | Cross-sectional    | Outpatient Clinic    | Adult         | 28.1 (8.2)    | 336                | HADS        | Generic      | Association between psychological factors and HRQOL | Paper                    | At entry                     |

| Author                                 | Type of study   | Setting                        | Patient group | Age mean (SD) | Population size, n | Instruments | Type of PROM | Why PROM used?                                      | Method of administration                 | Timepoints                                                |
|----------------------------------------|-----------------|--------------------------------|---------------|---------------|--------------------|-------------|--------------|-----------------------------------------------------|------------------------------------------|-----------------------------------------------------------|
|                                        |                 |                                |               |               |                    | CFQ-R       | Specific     | Association between psychological factors and HRQOL |                                          |                                                           |
| Platten et al, 2013, UK                | Cross-sectional | National database              | Adult         | 27.8 (9.2)    | 74                 | CFQ-R       | Specific     | Association between psychological factors and HRQOL | Online                                   | At entry                                                  |
|                                        |                 |                                |               |               |                    | CORE-OM     | Generic      | HRQOL in a population                               |                                          |                                                           |
| Quittner et al, 2009, US and Australia | Validation      | RCT data                       | All Age       | Not stated    | 200                | CFQ-R       | Specific     | Determine MCID                                      | Not stated                               | Not stated                                                |
| Quittner et al, 2010, US               | Cross-sectional | Longitudinal cohort study data | All Age       | Not stated    | 4751               | CFQ-R       | Specific     | Association between demographic factors and HRQOL   | Paper and Interview                      | At entry                                                  |
| Quittner et al, 2012, US               | Validation      | Longitudinal cohort study data | All Age       | Not stated    | 7330               | CFQ-R       | Specific     | Validate PROM                                       | Interview for children, other not stated | At entry                                                  |
| Quon et al, 2015, US                   | Cross-sectional | Outpatient Clinic              | Adult         | 28.6 (8.8)    | 153                | PHQ-9       | Generic      | HRQOL in a population                               | Not stated                               | At entry                                                  |
|                                        |                 |                                |               |               |                    | GAD-7       | Generic      | HRQOL in a population                               |                                          |                                                           |
| Ricotti et al, 2017, Italy             | Longitudinal    | Outpatient Clinic              | Adult         | 49.87 (11.8)  | 57                 | SF-36       | Generic      | HRQOL in a population                               | Interview                                | Four assessments Before LTx and 6,12, 24 months after LTx |
|                                        |                 |                                |               |               |                    | SGRQ        | Respiratory  | HRQOL in a population                               |                                          |                                                           |
|                                        |                 |                                |               |               |                    | GHQ         | Generic      | HRQOL in a population                               |                                          |                                                           |

| Author                       | Type of study                | Setting                        | Patient group | Age mean (SD) | Population size, n | Instruments | Type of PROM | Why PROM used?                                      | Method of administration | Timepoints                  |
|------------------------------|------------------------------|--------------------------------|---------------|---------------|--------------------|-------------|--------------|-----------------------------------------------------|--------------------------|-----------------------------|
| Salek et al, 2012, UK        | Cross-sectional              | Outpatient and Inpatient       | Adult         | 26.1 (7.3)    | 70                 | UKSIP       | Generic      | Used to validate another PROM                       | Postal and interview     | At entry                    |
|                              |                              |                                |               |               |                    | CFQOL       | Specific     | Validate PROM                                       |                          |                             |
| Sawicki et al, 2009, US      | Cross-sectional              | Longitudinal cohort study data | Adult         | 35.4 (10)     | 204                | CFQ-R       | Specific     | HRQOL in a population                               | Not stated               | At entry                    |
| Sawicki, 2011, US            | Cross-sectional              | Outpatient Clinic              | Adult         | 35.8 (10.3)   | 199                | CFQ-R       | Specific     | Association between psychological factors and HRQOL | Not stated               | Not stated                  |
| Sawicki et al, 2011, US      | Longitudinal                 | National database              | All Age       | Not stated    | 1366               | CFQ-R       | Specific     | Association between physical factors and HRQOL      | Not stated               | At entry and one year later |
| Schmidt et al, 2009, Germany | Validation                   | Outpatient Clinic              | Child         | 10.2 (1.9)    | 136                | CFQ-R       | Specific     | Validate PROM                                       | Paper and Interview      | At entry                    |
| Schmidt et al, 2011, Denmark | Non-randomised control trial | Outpatient Clinic              | All Age       | Not stated    | 38                 | CFQ-R       | Specific     | Association between physical factors and HRQOL      | Not stated               | At entry and 3 months later |
| Shoff et al, 2013, US        | Longitudinal                 | RCT data                       | Child         | 13.5          | 95                 | CFQ         | Specific     | Association between social factors and HRQOL        | Paper and Interview      | 3 assessments Yearly        |
| Simon et al, 2011, US        | Cross-sectional              | Outpatient Clinic              | Child         | 13.6 (2.3)    | 54                 | CFQ-R       | Specific     | Association between psychological factors and HRQOL | Paper                    | At entry                    |

| Author                           | Type of study                 | Setting                        | Patient group | Age mean (SD) | Population size, n | Instruments | Type of PROM | Why PROM used?                                    | Method of administration | Timepoints                                                                      |
|----------------------------------|-------------------------------|--------------------------------|---------------|---------------|--------------------|-------------|--------------|---------------------------------------------------|--------------------------|---------------------------------------------------------------------------------|
| Sole et al, 2016, Spain          | Longitudinal                  | Outpatient Clinic              | Adult         | 25.4 (8.5)    | 152                | CFQ-R       | Specific     | HRQOL as a predictor                              | Not stated               | 12 assessments<br>3 monthly                                                     |
| Sole et al, 2018, Spain          | Validation                    | Outpatient Clinic              | All Age       | Not stated    | 50                 | e-CFQ-R     | Specific     | Validate PROM                                     | Software program         | At entry and 15 days later                                                      |
| Solem et al, 2016, US            | Longitudinal                  | RCT data                       | All Age       | 25.5 (9.5)    | 161                | EQ-5D       | Generic      | Association between physical factors and HRQOL    | Not stated               | 8 assessments<br>Baseline, day 15, week 8, every 8 weeks after through 48 weeks |
| Stofa et al, 2016, Greece        | Cross-sectional               | Not stated                     | Adult         | Not stated    | 77                 | CFQOL       | Specific     | HRQOL in a population                             | Not stated               | At entry                                                                        |
| Tepper et al, 2013, Netherlands  | Retrospective cross-sectional | Outpatient Clinic              | Child         | 13.4          | 72                 | CFQ-R RSS   | Specific     | Correlate to diagnostic test                      | Paper                    | 3 assessments<br>Yearly                                                         |
| Tibosch et al, 2011, Netherlands | Cross-sectional               | Healthy school children        | Child         | 14.52 (3.16)  | 478                | CFQ         | Specific     | HRQOL in a population                             | Paper and Interview      | At entry                                                                        |
| Tluczek et al, 2011, US          | Longitudinal                  | Longitudinal cohort study data | Child         | 13.5 (2.8)    | 95                 | CFQ         | Specific     | Association between demographic factors and HRQOL | Paper and Interview      | Not stated                                                                      |
| Tluczek et al, 2013, US          | Longitudinal                  | Longitudinal cohort study data | Child         | 13.3 (2.7)    | 92                 | CFQ         | Specific     | Assess parent-proxy reporting                     | Paper and Interview      | Not stated                                                                      |
| Tomaszek et al, 2018, Poland     | Cross-sectional               | Outpatient Clinic              | All Age       | 19            | 95                 | CFQOL       | Specific     | Association between physical factors and HRQOL    | Not stated               | Not stated                                                                      |

| Author                           | Type of study   | Setting                  | Patient group | Age mean (SD) | Population size, n | Instruments | Type of PROM | Why PROM used?                                      | Method of administration | Timepoints                                                     |
|----------------------------------|-----------------|--------------------------|---------------|---------------|--------------------|-------------|--------------|-----------------------------------------------------|--------------------------|----------------------------------------------------------------|
|                                  |                 |                          |               |               |                    | HADS        | Generic      | Association between psychological factors and HRQOL |                          |                                                                |
| Toth et al, 2016, Hungary        | Cross-sectional | Not stated               | Adult         | 28.25 (8.95)  | 57                 | CFQ-R       | Specific     | HRQOL in a population                               | Paper                    | At entry                                                       |
| Trinick et al,                   | Cross-sectional | Outpatient Clinic        | Child         | Not stated    | 63                 | LRSQ        | Respiratory  | Validate PROM in new age group                      | Not stated               | At entry                                                       |
| Uchmanowicz et al, 2014, Poland  | Cross-sectional | Outpatient Clinic        | Adult         | 24.83 (6.98)  | 30                 | SF-36       | Generic      | HRQOL in a population                               | Not stated               | Not stated                                                     |
| Uchmanowicz et al, 2015, Poland  | Cross-sectional | Outpatient Clinic        | Adult         | 24.83 (6.98)  | 30                 | CFQOL       | Specific     | Association between demographic factors and HRQOL   | Not stated               | Not stated                                                     |
| Vandeleur et al, 2018, Australia | Cross-sectional | Outpatient Clinic        | Child         | Not stated    | 87                 | CFQ-R       | Specific     | Association between physical factors and HRQOL      | Not stated               | Not stated                                                     |
|                                  |                 |                          |               |               |                    | PedsQL      | Generic      | Association between physical factors and HRQOL      |                          |                                                                |
| Ward et al, 2017, Australia      | Validation      | Outpatient and Inpatient | Adult         | 29 (9.3)      | 59                 | LCQ         | Respiratory  | Validate PROM                                       | Paper                    | 3 assessments<br>At entry, one week later and four weeks later |
|                                  |                 |                          |               |               |                    | ReS-CF      | Specific     | Develop PROM                                        |                          |                                                                |
|                                  |                 |                          |               |               |                    | CFQ-R       | Specific     | Used to validate another PROM                       |                          |                                                                |

| Author                       | Type of study   | Setting           | Patient group | Age mean (SD) | Population size, n | Instruments           | Type of PROM | Why PROM used?                                      | Method of administration | Timepoints                         |
|------------------------------|-----------------|-------------------|---------------|---------------|--------------------|-----------------------|--------------|-----------------------------------------------------|--------------------------|------------------------------------|
| Xie et al, 2017, US          | Validation      | Not stated        | Child         | 8.7 (5.28)    | 165                | SN-5                  | Respiratory  | Validate PROM in new age group                      | Not stated               | At entry and median 7 months later |
| Yohannes et al, 2011, UK     | Validation      | Outpatient Clinic | Adult         | 29.6 (8.9)    | 121                | Single item QOL scale | Generic      | Develop PROM                                        | Paper                    | At entry and 10 days later         |
|                              |                 |                   |               |               |                    | CFQOL                 | Specific     | Used to validate another PROM                       |                          |                                    |
|                              |                 |                   |               |               |                    | HADS                  | Generic      | Used to validate another PROM                       |                          |                                    |
| Yohannes et al, 2012, UK     | Cross-sectional | Outpatient Clinic | Adult         | 30 (8.8)      | 121                | CFQOL                 | Specific     | Association between psychological factors and HRQOL | Paper                    | At entry                           |
|                              |                 |                   |               |               |                    | HADS                  | Generic      | HRQOL in a population                               |                          |                                    |
| Young et al, 2011, Australia | Cross-sectional | Outpatient Clinic | Adult         | 31 (8)        | 60                 | CFQOL                 | Specific     | Association between physical factors and HRQOL      | Not stated               | Not stated                         |
| Yuksel et al, 2013, Turkey   | Validation      | Outpatient Clinic | Child         | 9.8 (2.6)     | 51                 | CFQ-R                 | Specific     | Validate PROM                                       | Not stated               | Not stated                         |
|                              |                 |                   |               |               |                    | KINDL                 | Generic      | Used to validate another PROM                       |                          |                                    |
